# Supplementary material for: Essential childhood immunization in 43 low- and middle-income countries: Analysis of spatial trends and socioeconomic inequalities in vaccine coverage
Source: PubMed Central journal article supplement (PMC9888726; doi:10.1371/journal.pmed.1004166), 2023-01-17

**Fig S6.** Intersecting sets of missed vaccinations for children aged 15 to 35 months for 43 countries. The black dots represent vaccine combinations and the bars represent the number of missed vaccinations for each vaccine combination. Note that multiple doses of DTP and OPV are needed to reach full immunization, therefore, the presented estimates do not refer to the number of missed doses but complete vaccinations. If a child is missing two or more doses of a specific vaccine, the child will be counted only once.

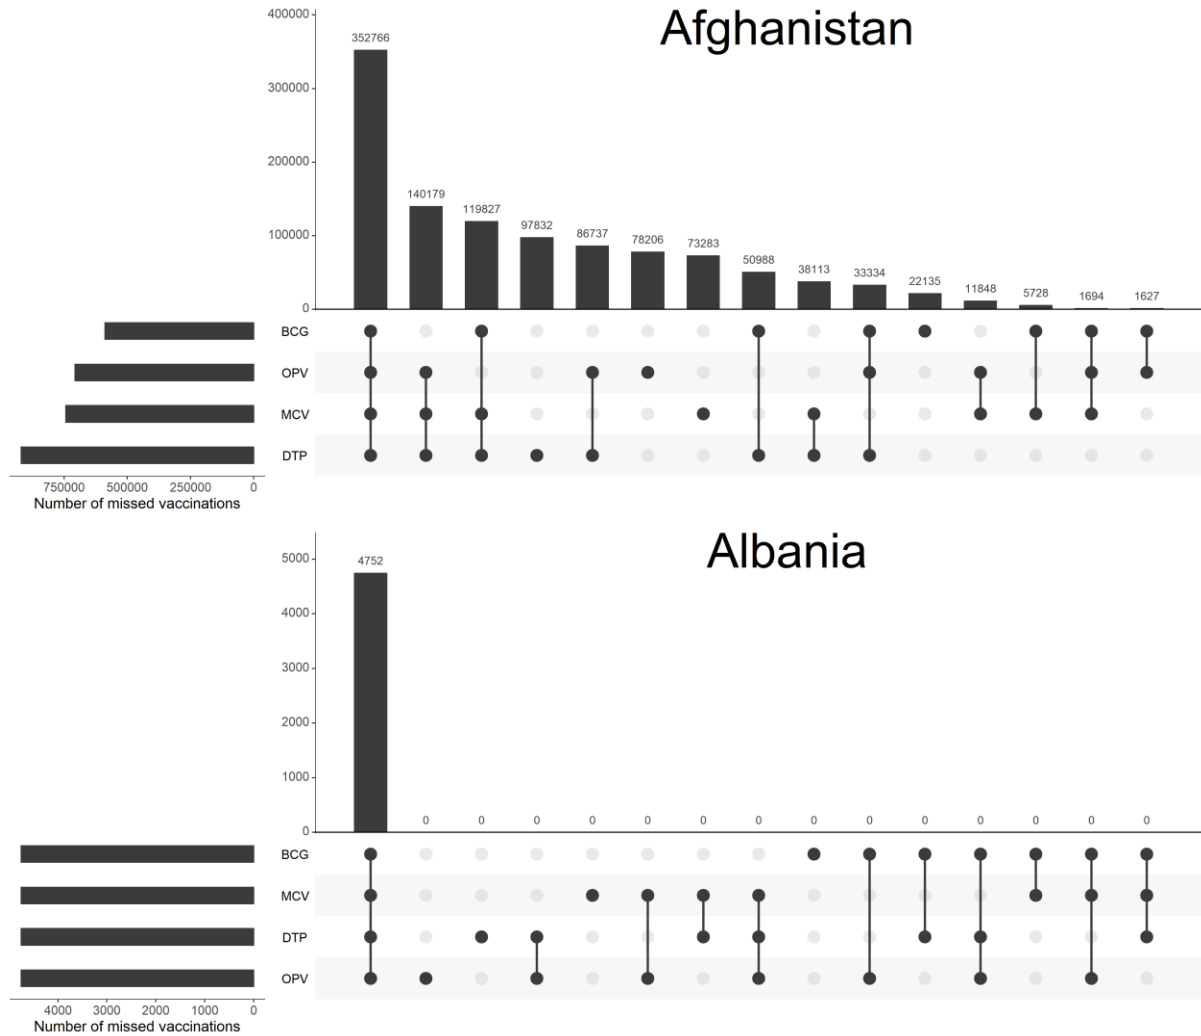

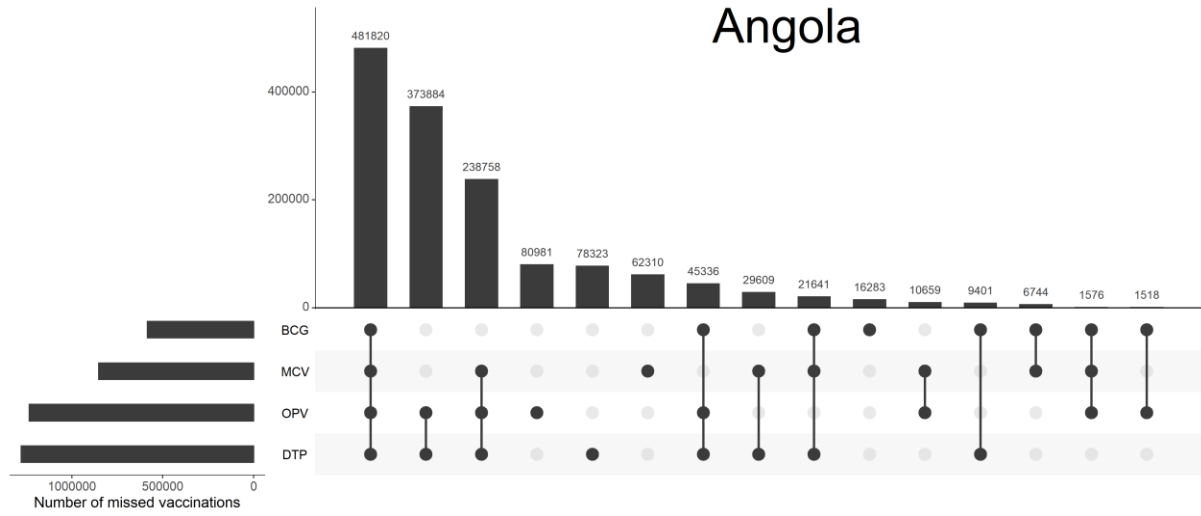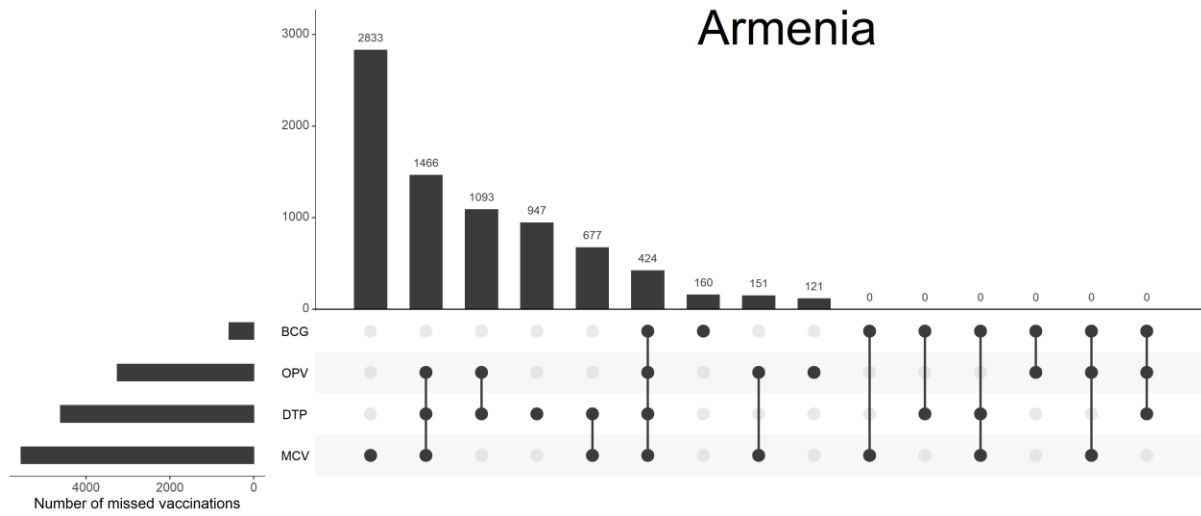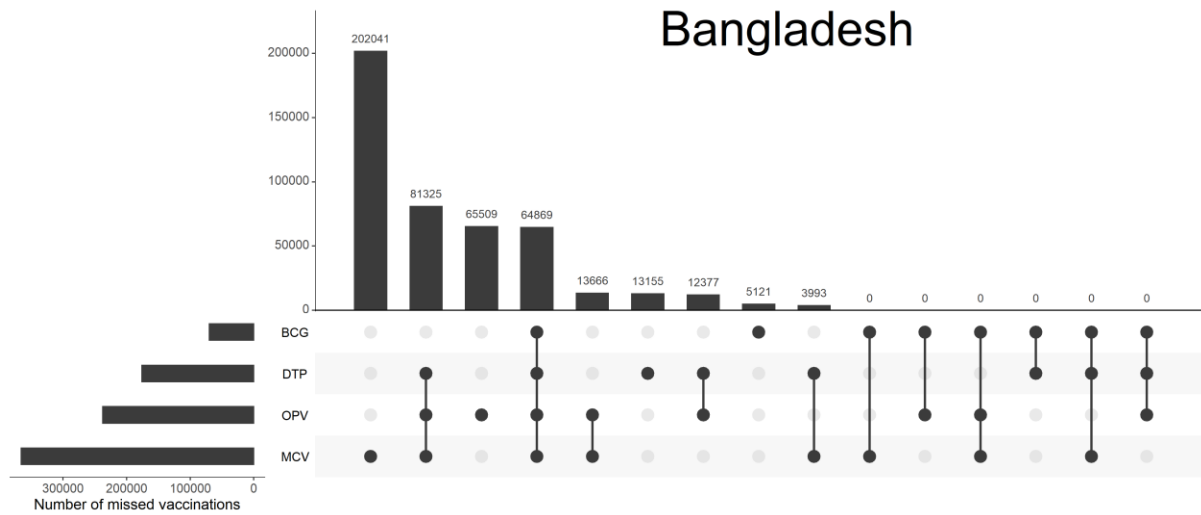

## Benin

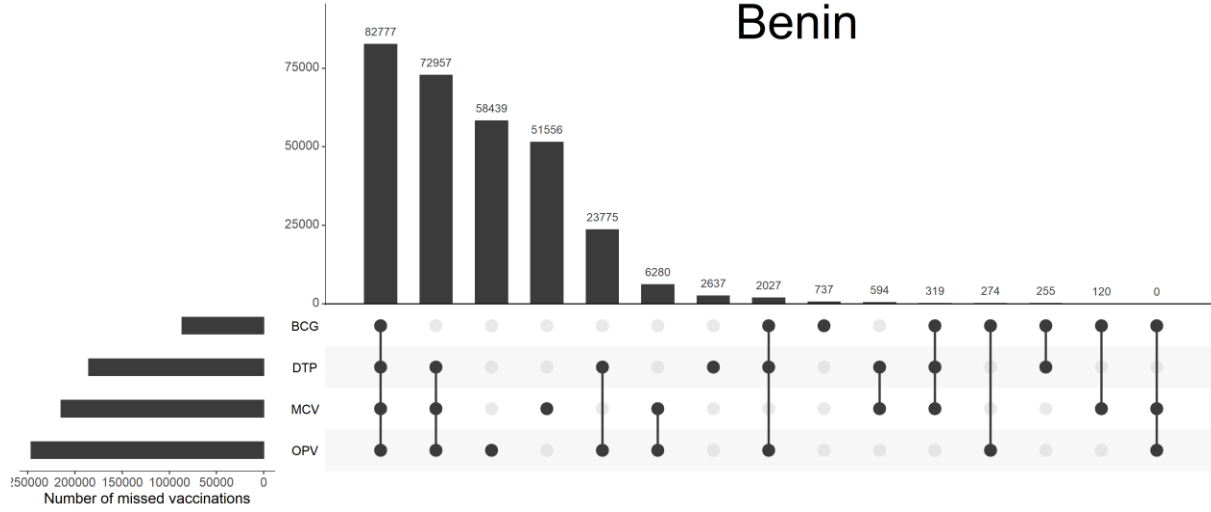

## Burundi

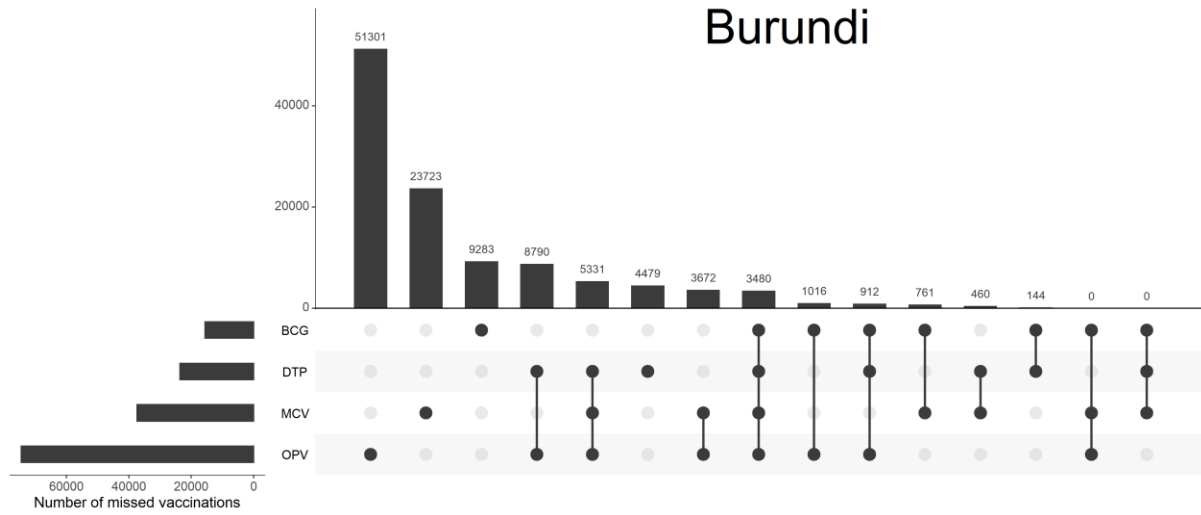

## Cambodia

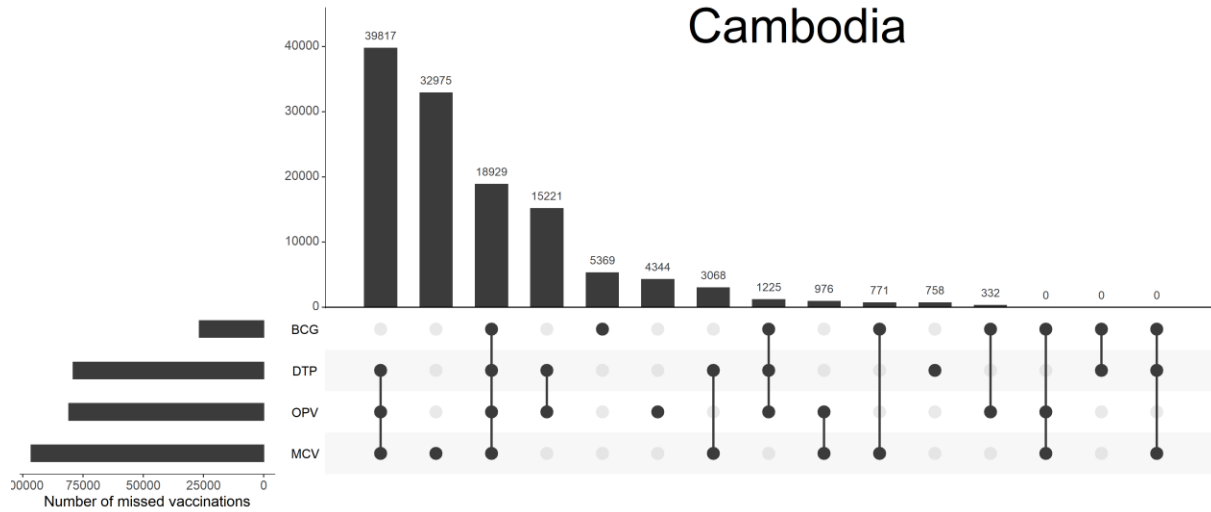

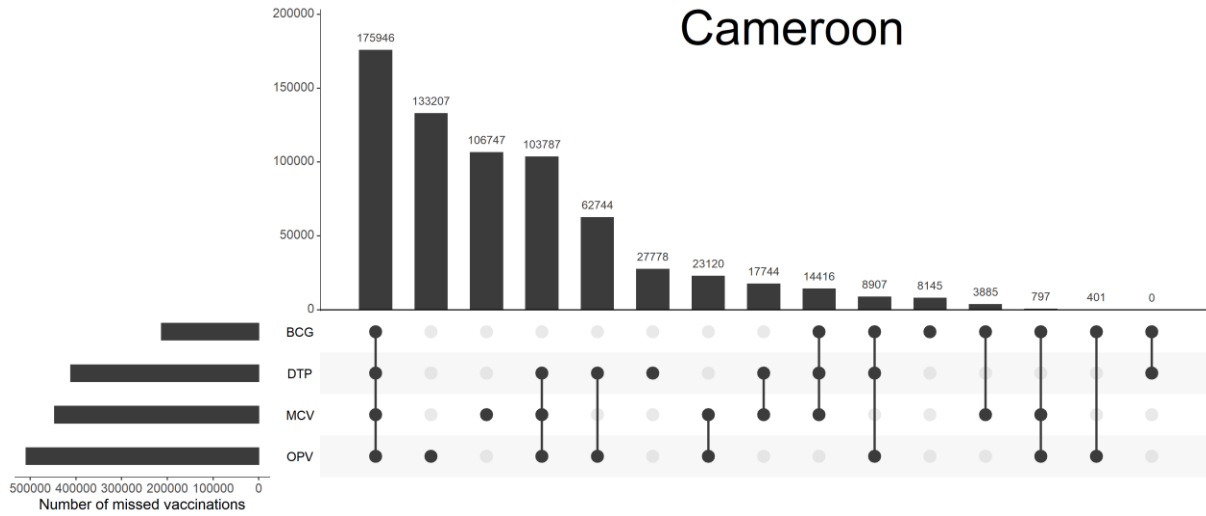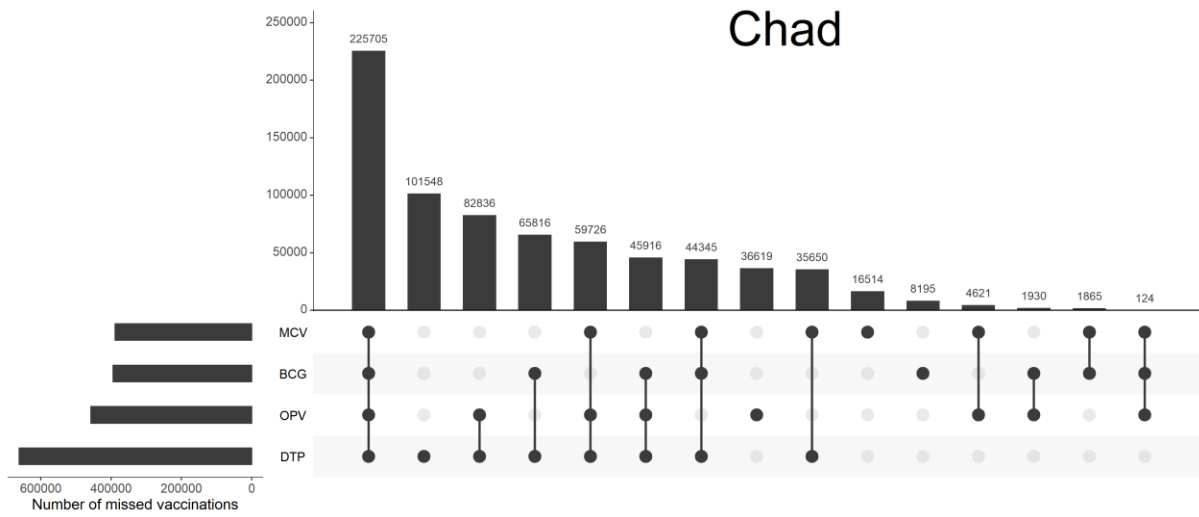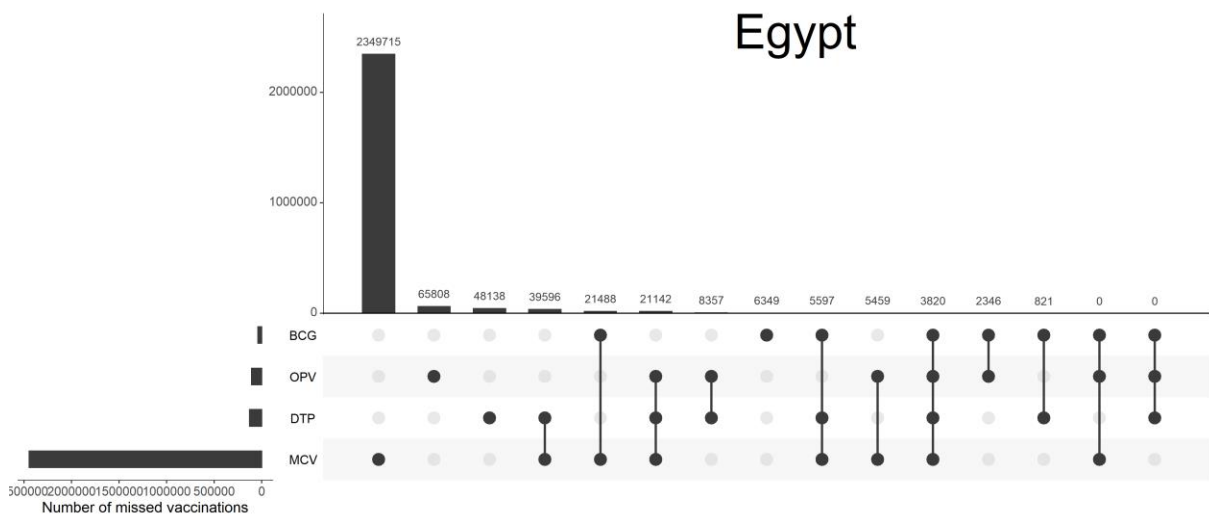

# Ethiopia

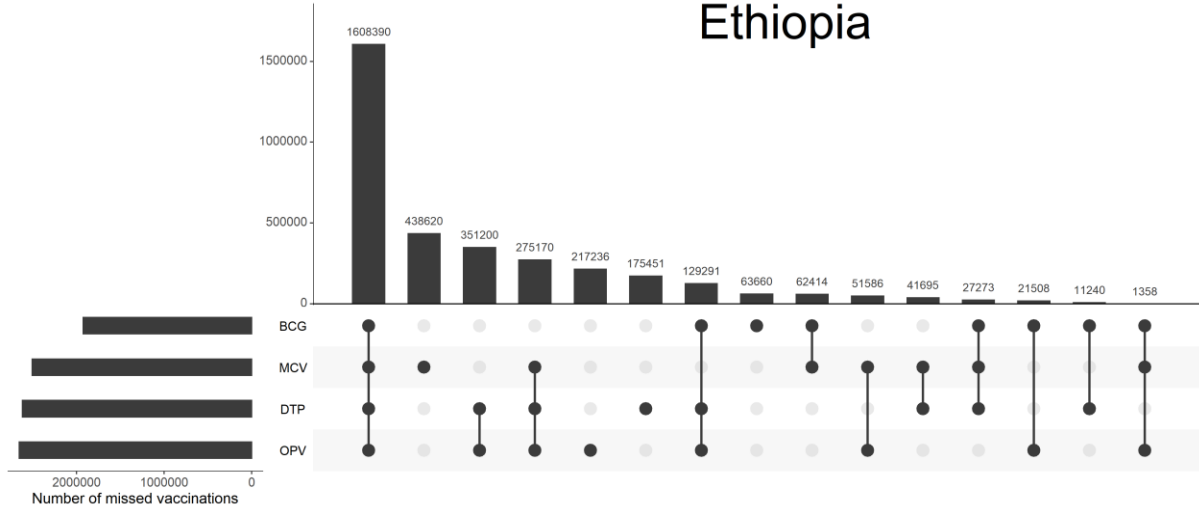

# Ghana

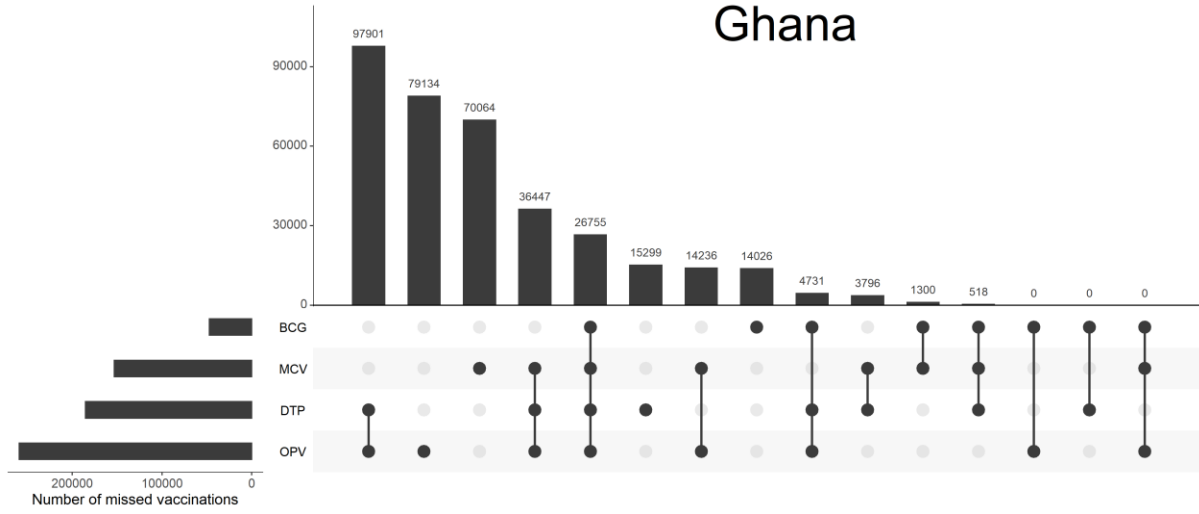

# Guatemala

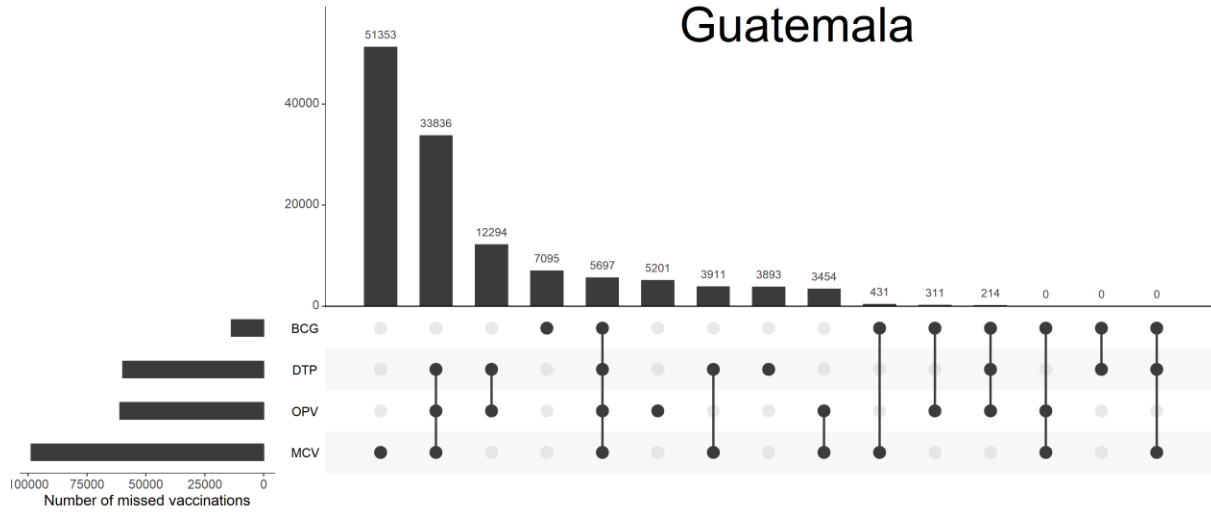

## Guinea

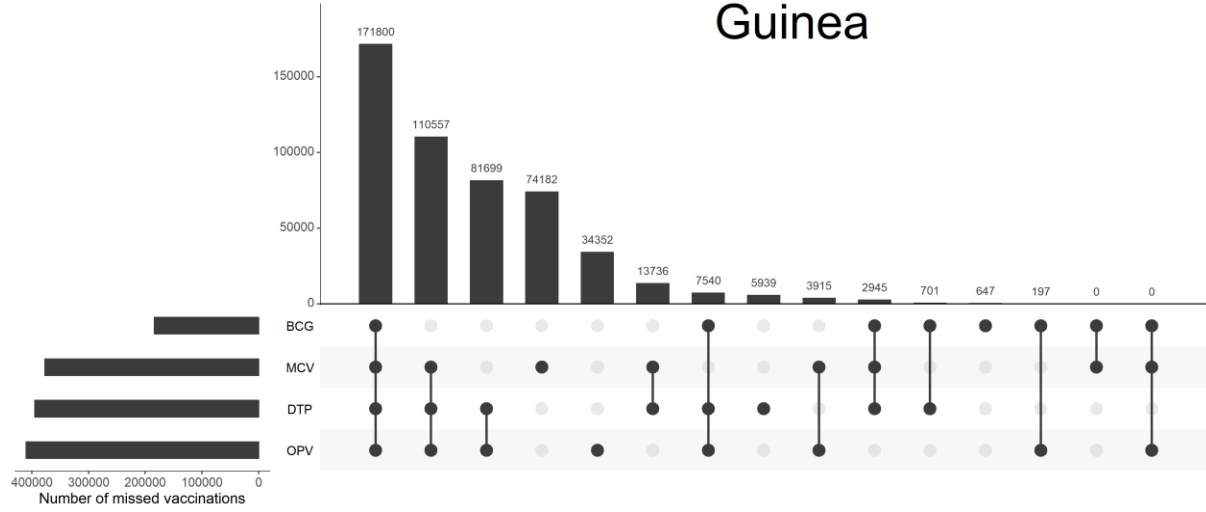

## Haiti

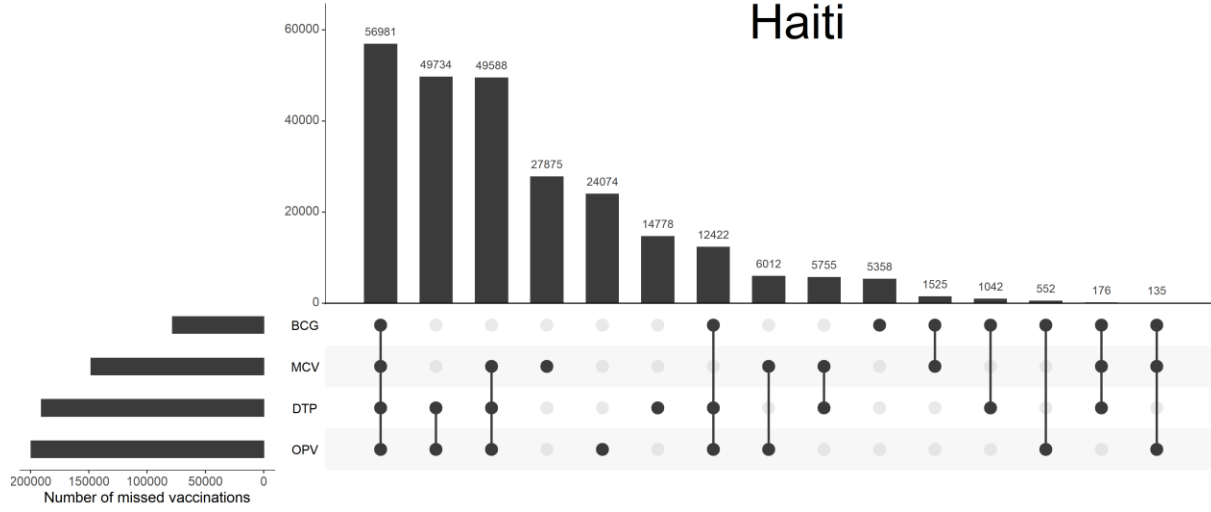

## India

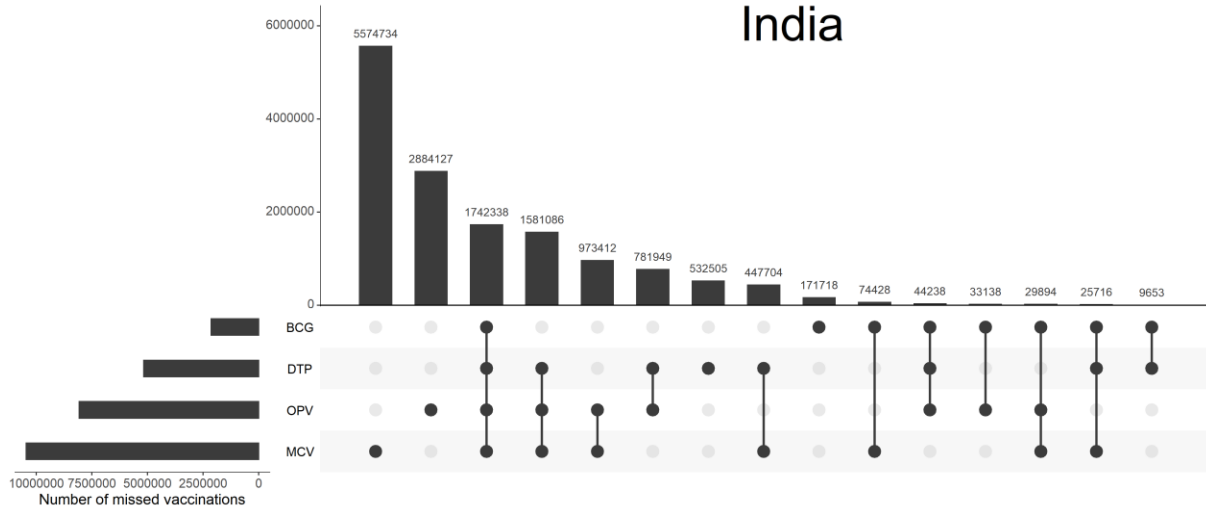

## Indonesia

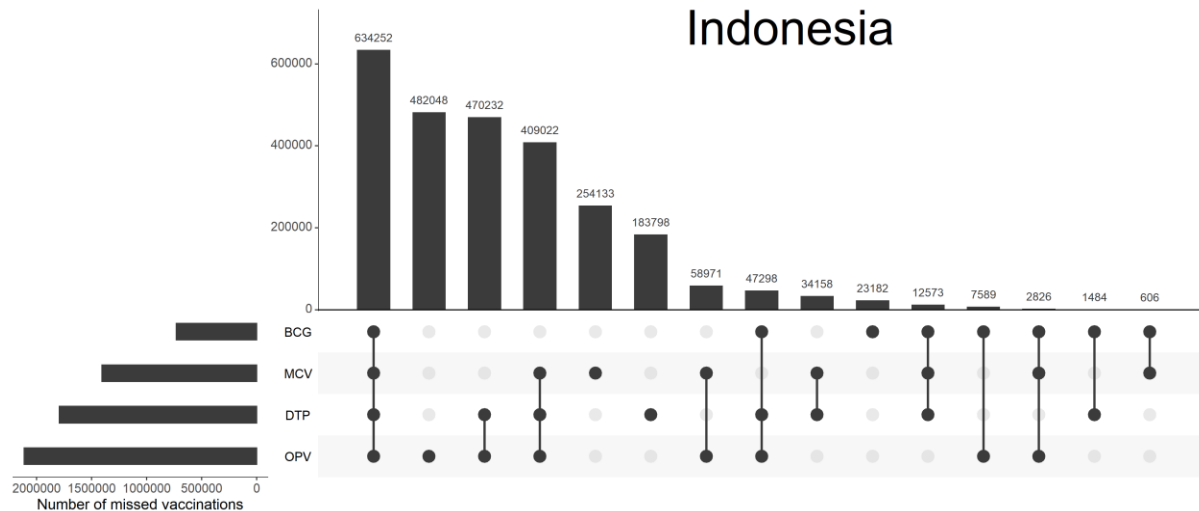

## Jordan

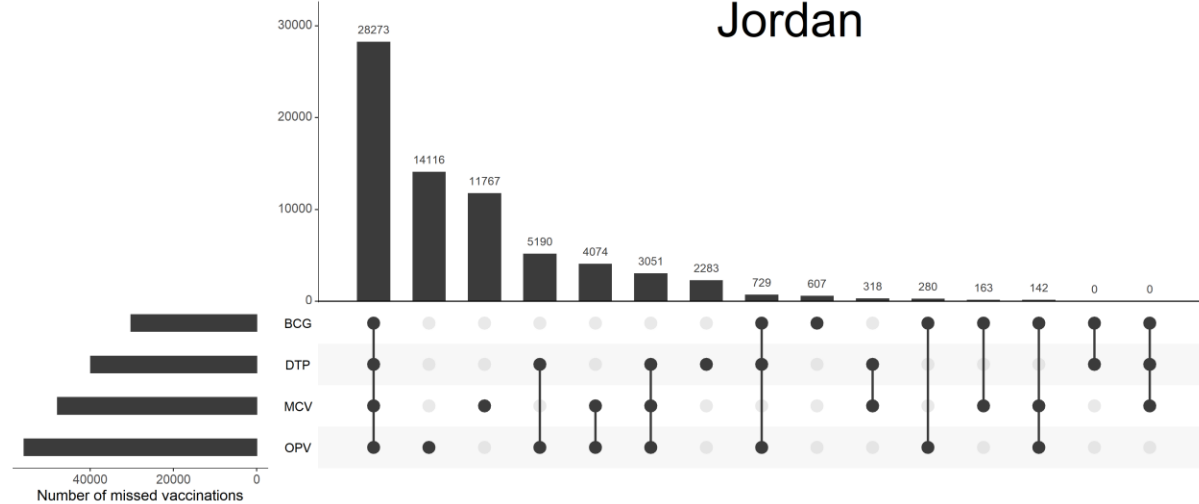

## Kenya

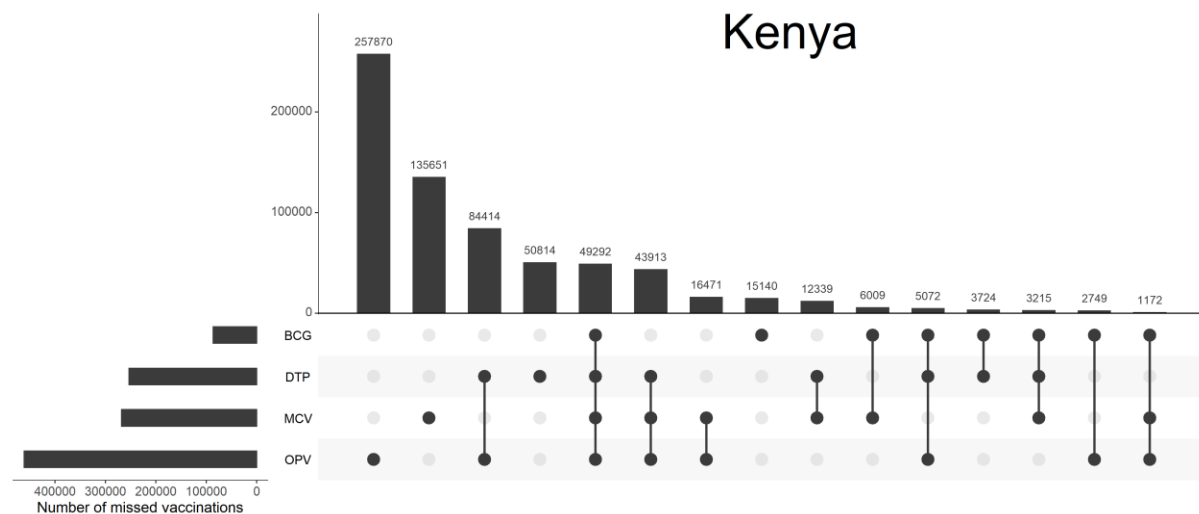

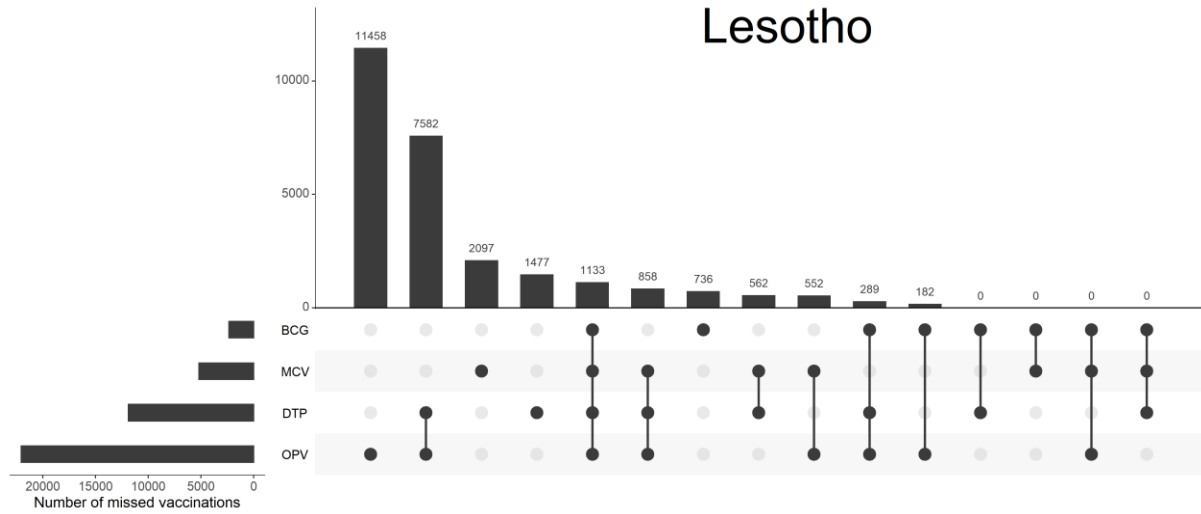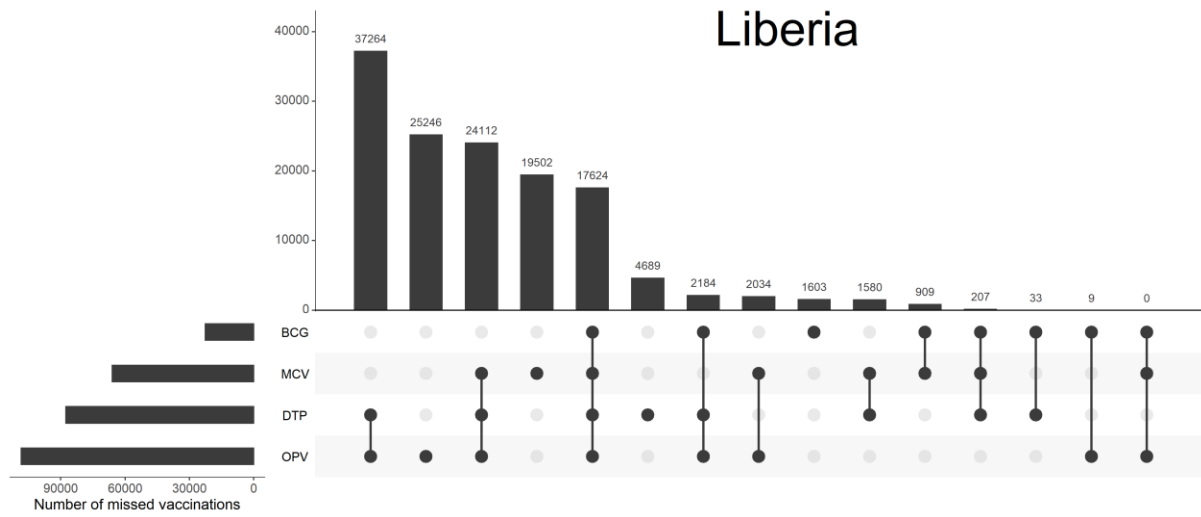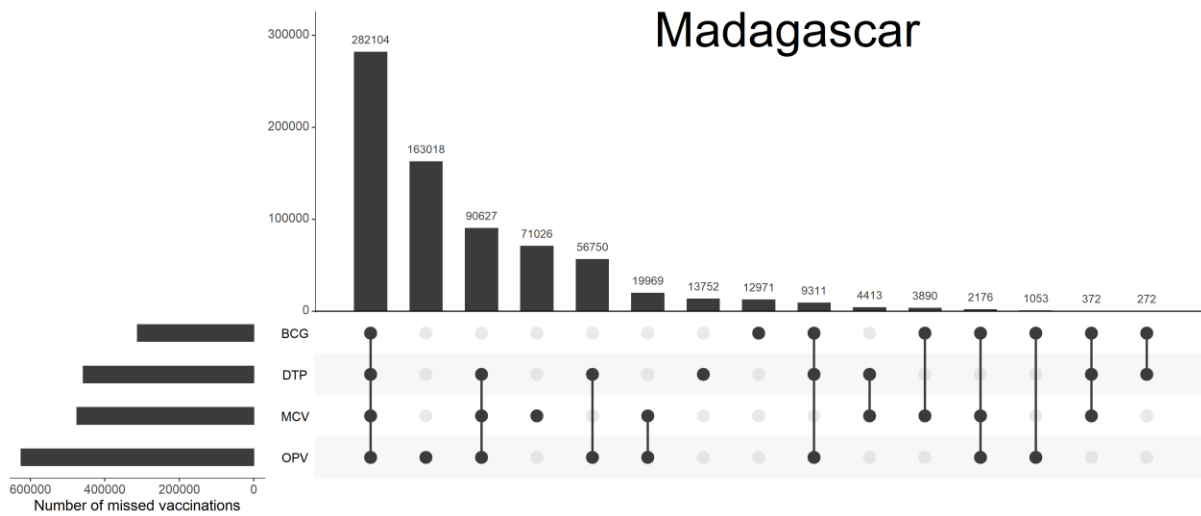



# Malawi

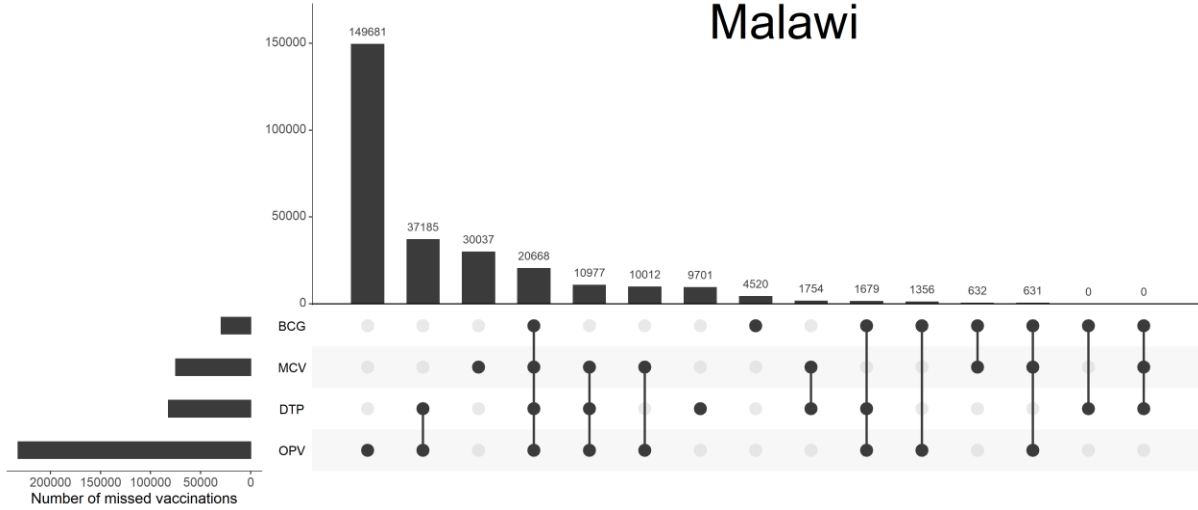

# Maldives

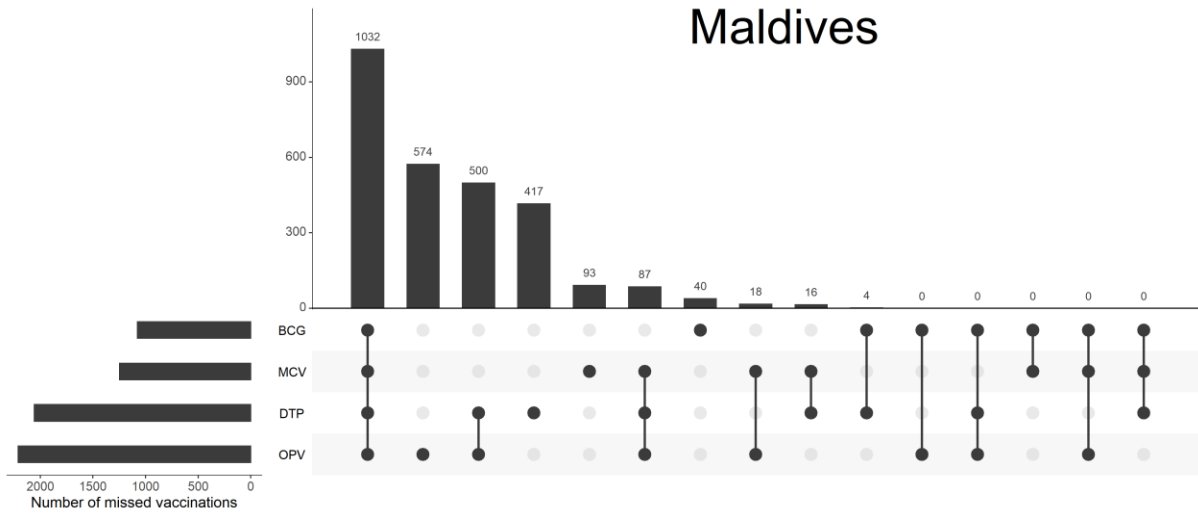

# Mali

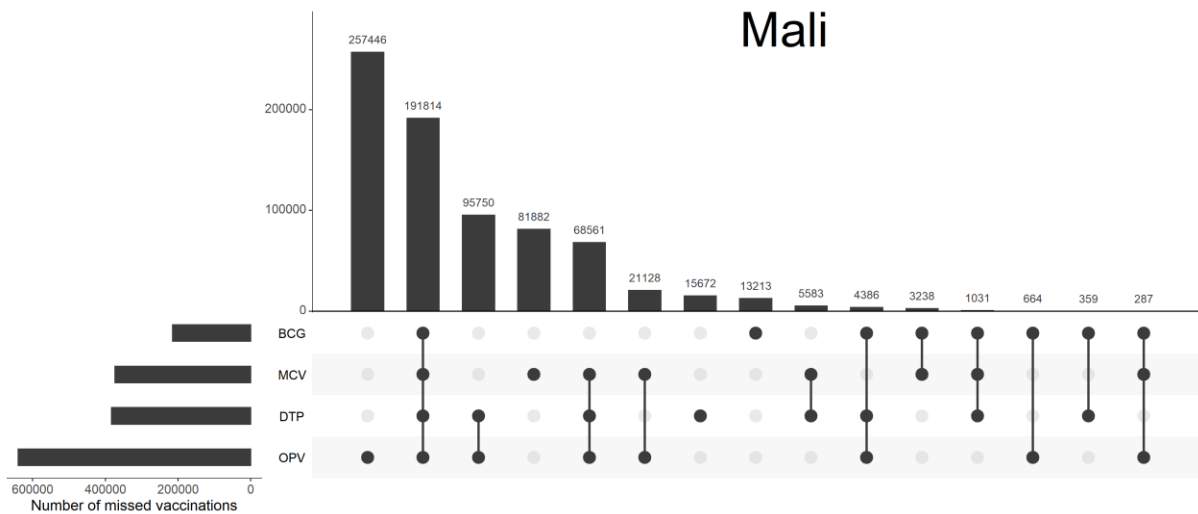

## Mauritania

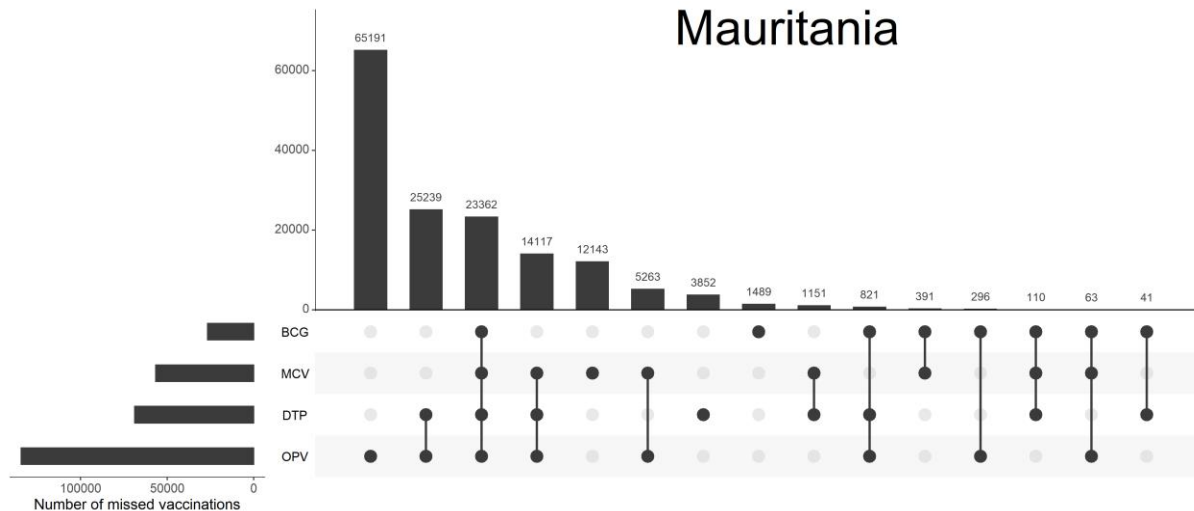

## Myanmar

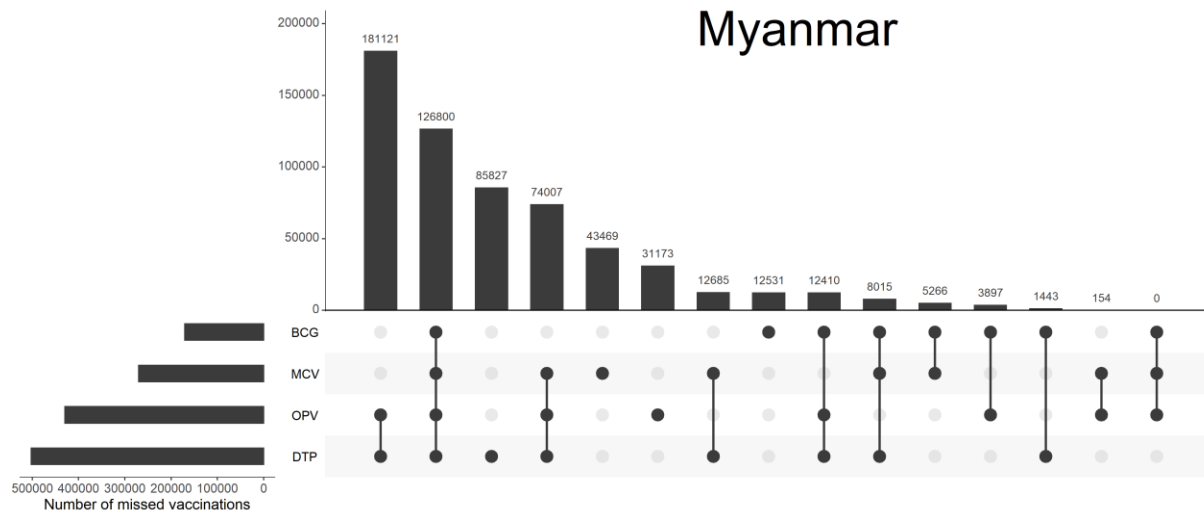

## Nepal

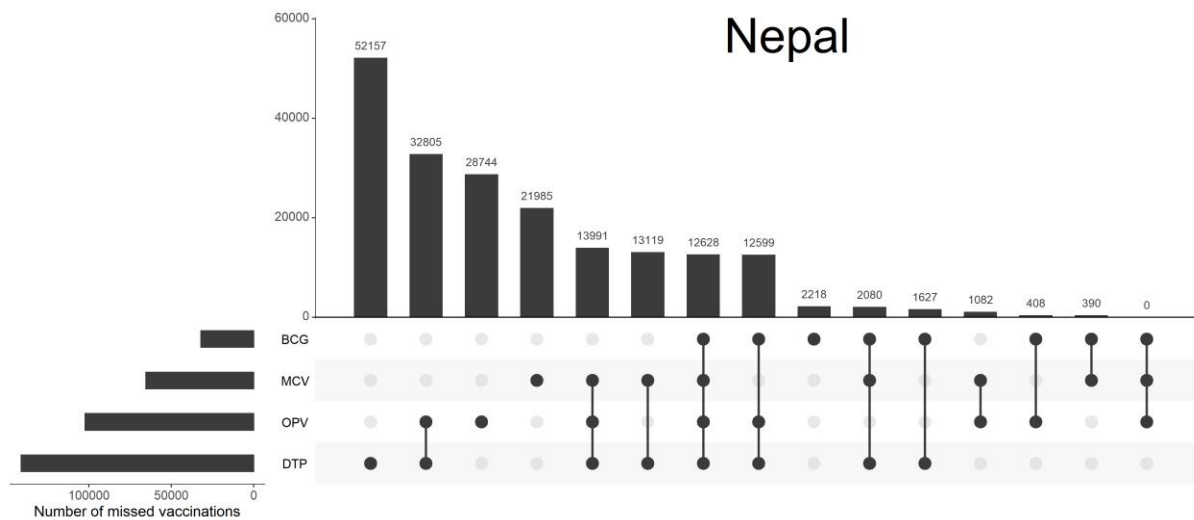

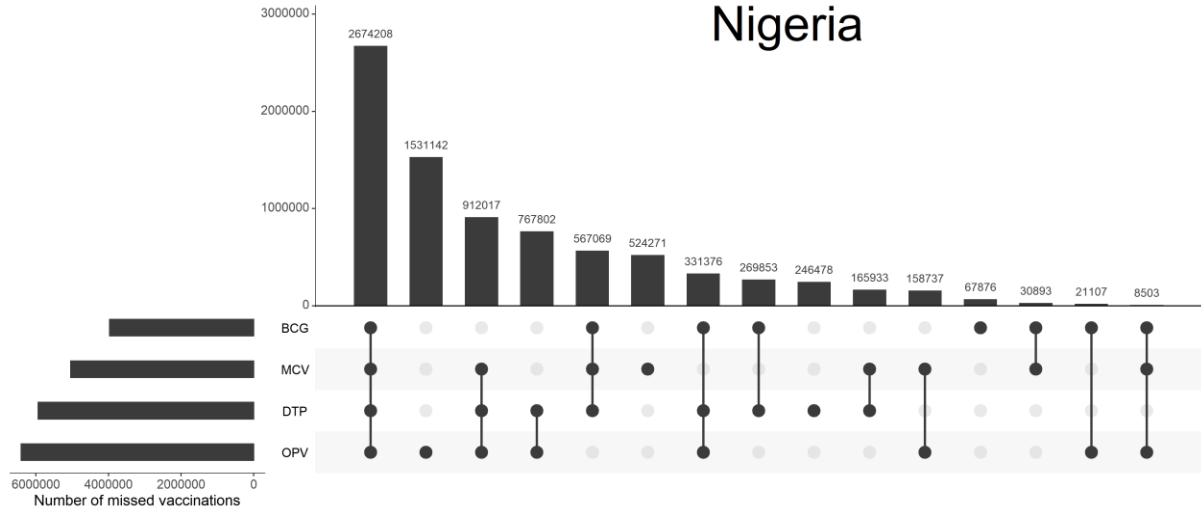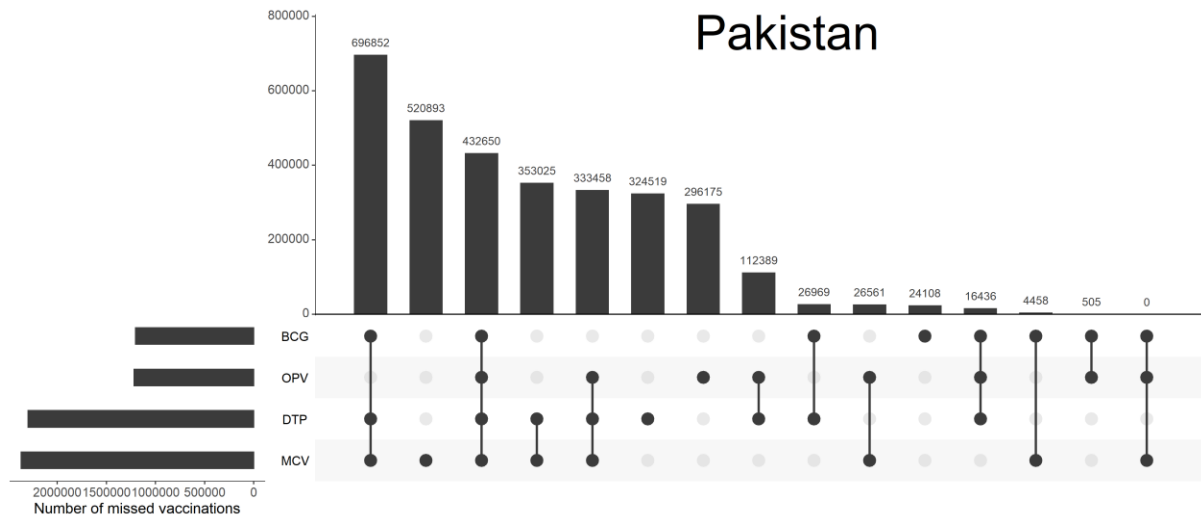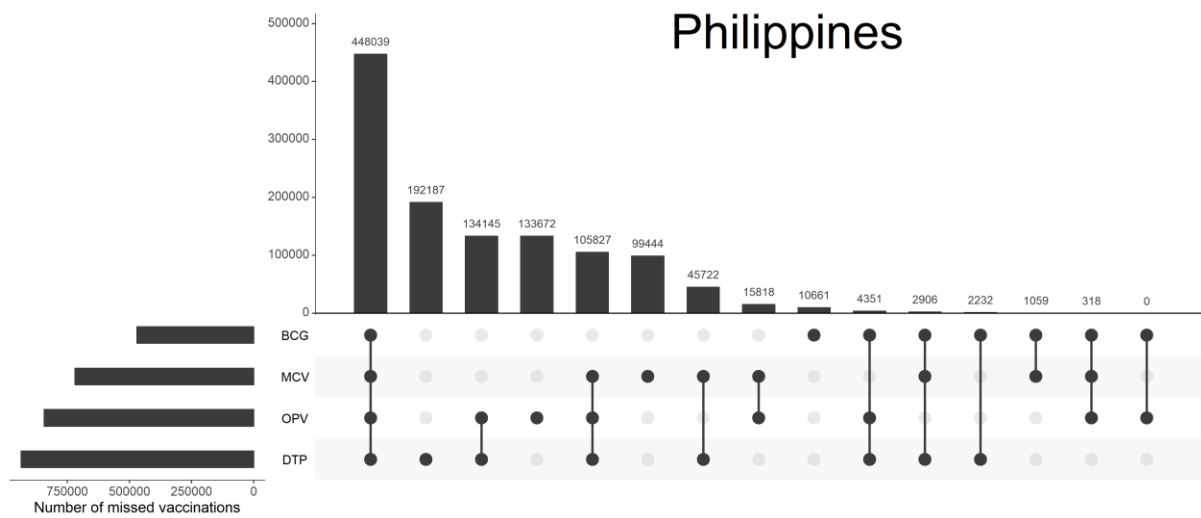

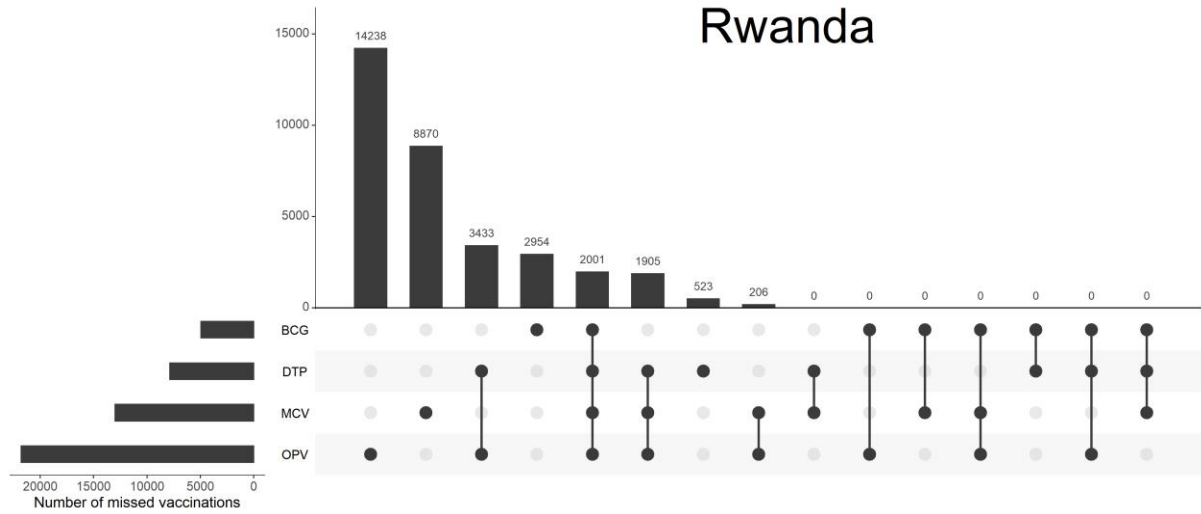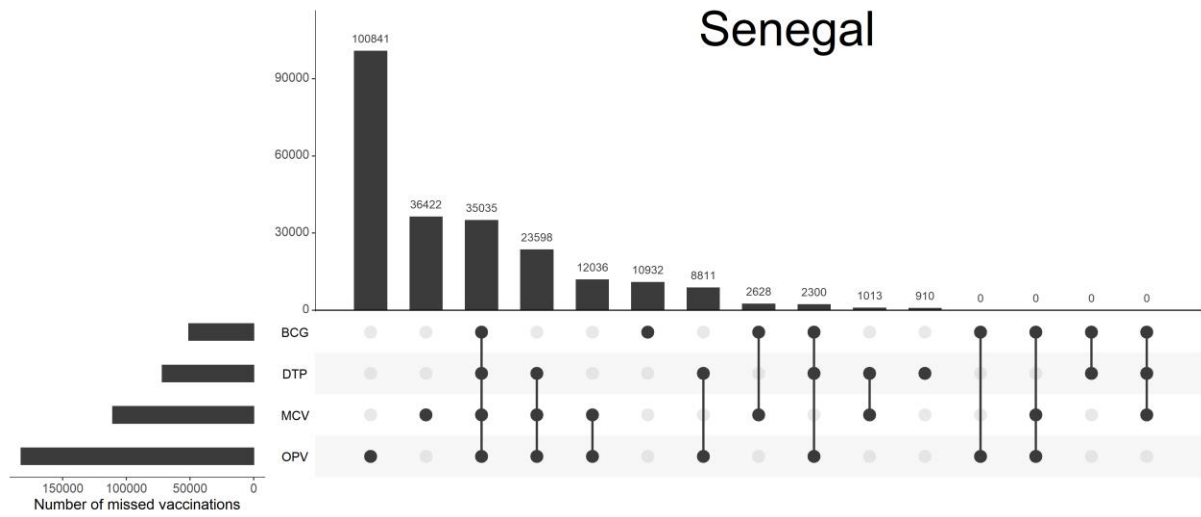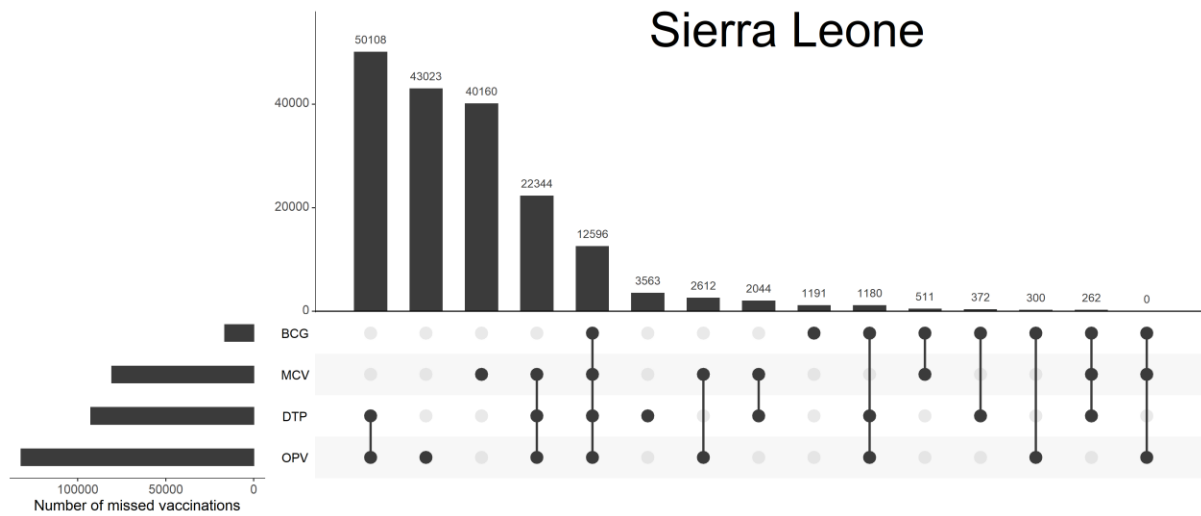

## South Africa

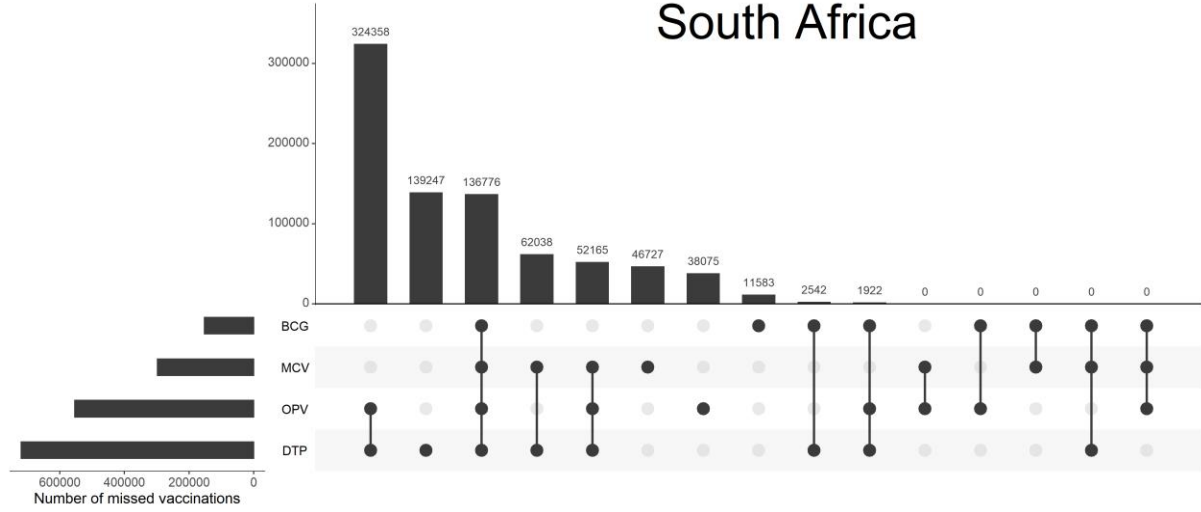

## Tajikistan

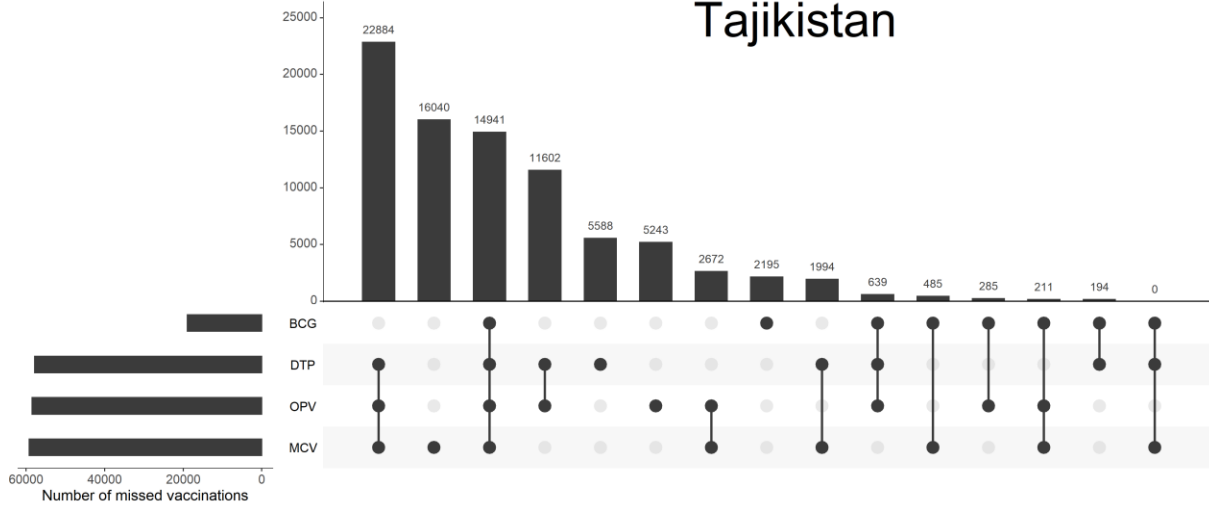

## Tanzania

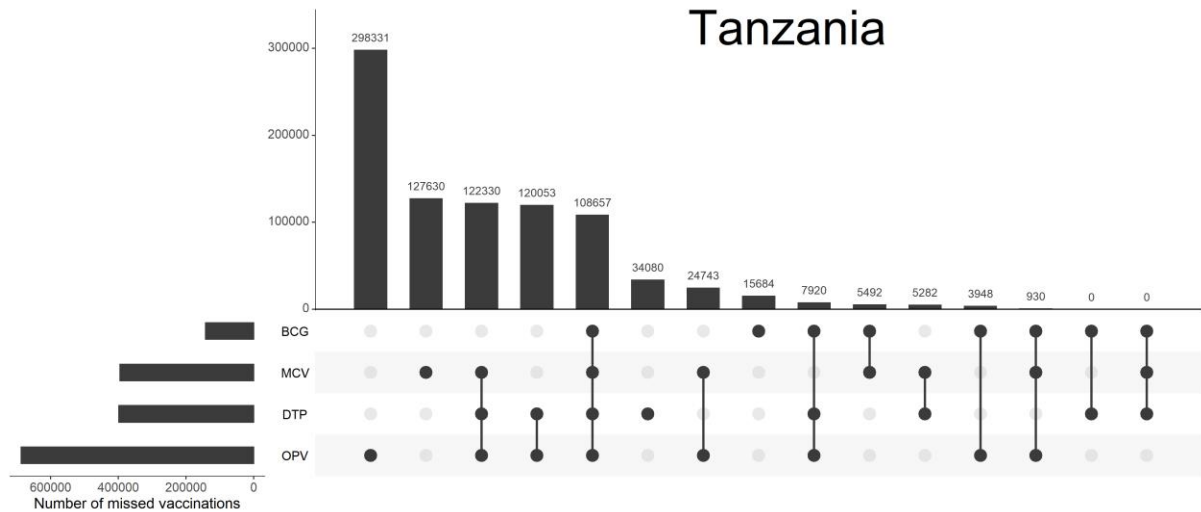

## The Gambia

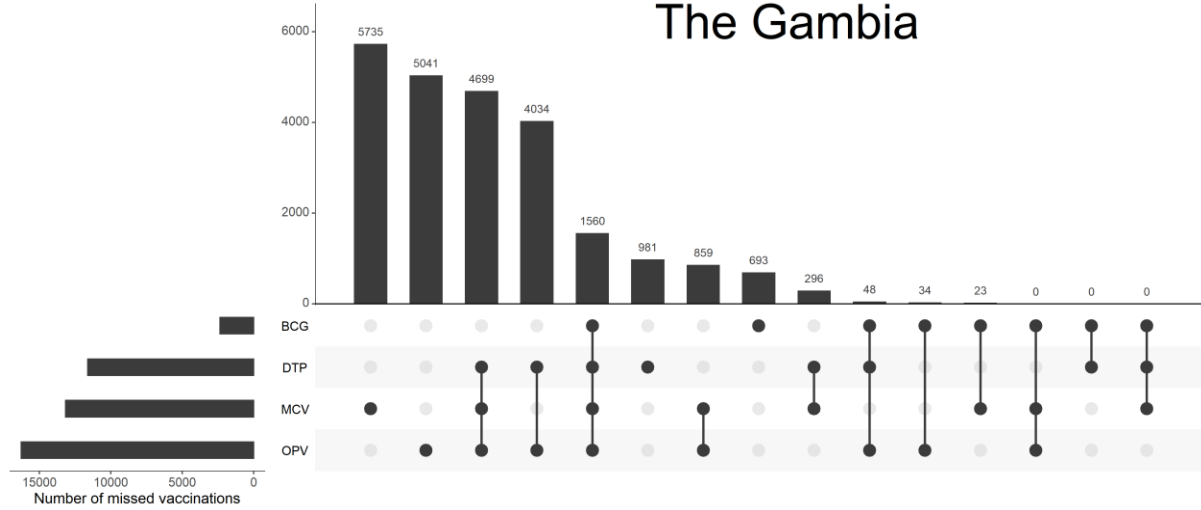

## Timor-Leste

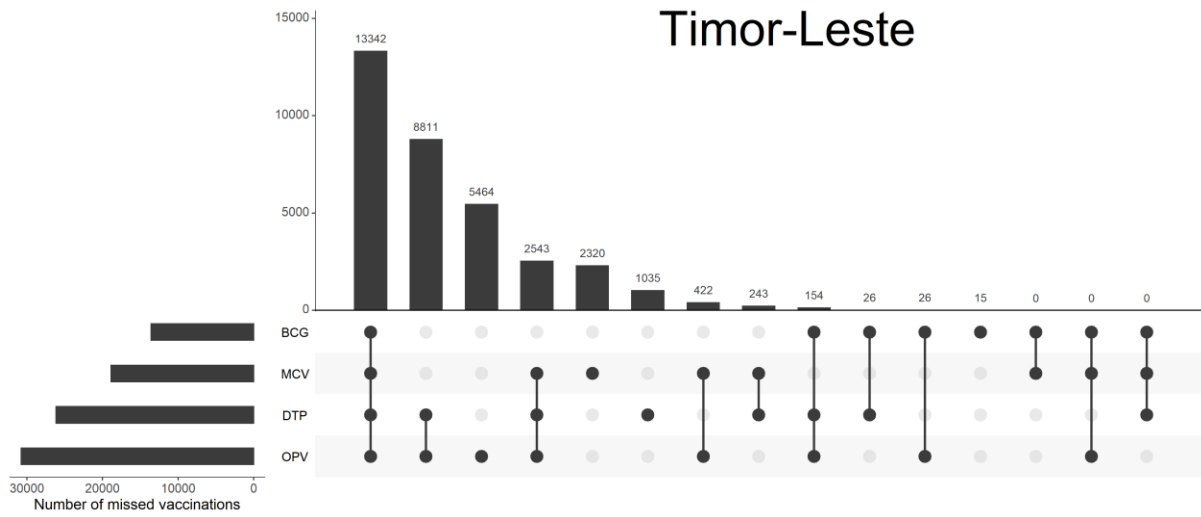

## Uganda

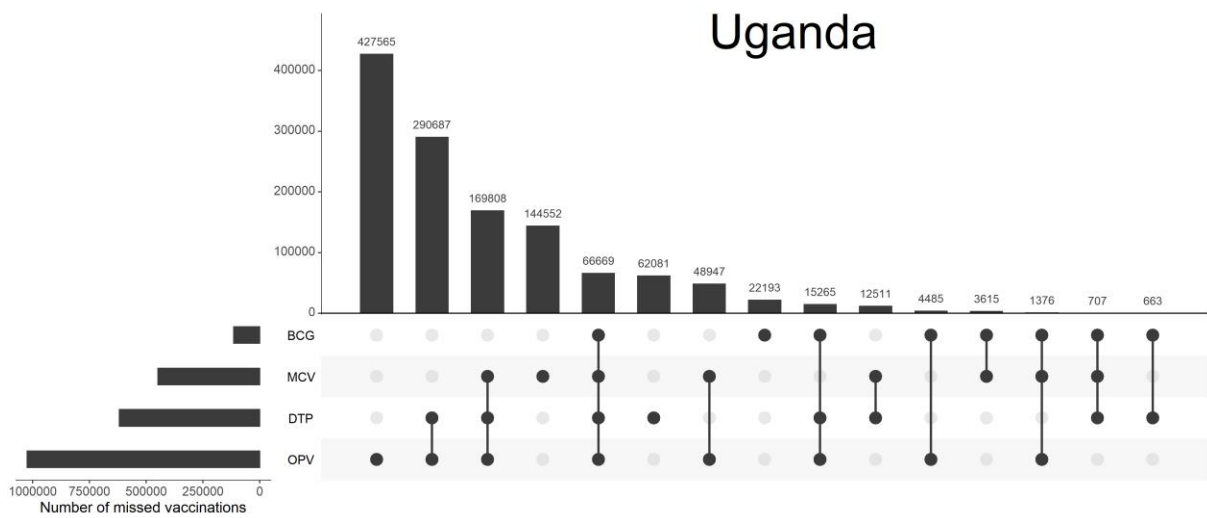

# Zambia

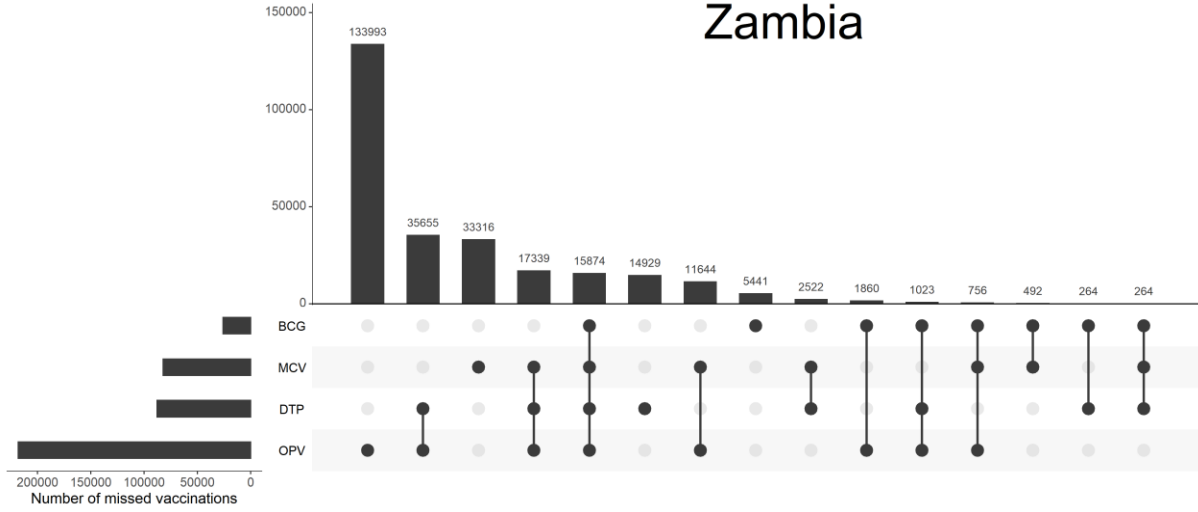

# Zimbabwe

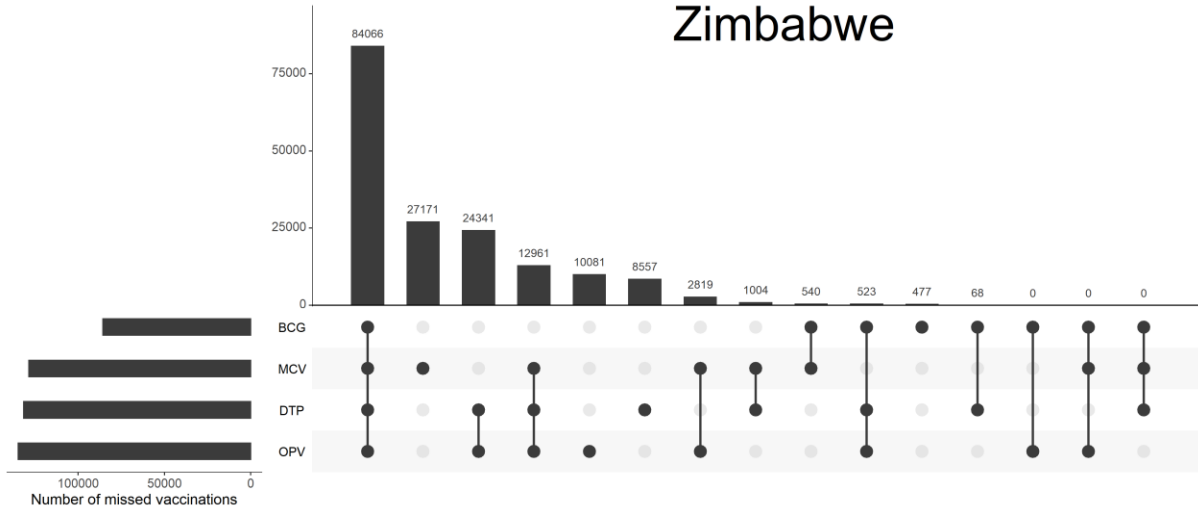

Supplement: pmed.1004166.s012.pdf [file pmed.1004166.s012.pdf]
