# Supplementary material for: Essential childhood immunization in 43 low- and middle-income countries: Analysis of spatial trends and socioeconomic inequalities in vaccine coverage
Source: PubMed Central journal article supplement (PMC9888726; doi:10.1371/journal.pmed.1004166), 2023-01-17
Supplement: pmed.1004166.s001.pdf [file pmed.1004166.s001.pdf]

**Table S1.** STROBE Statement—Checklist of items that should be included in reports of cross-sectional studies

|                           | <b>Item No</b> | <b>Recommendation</b>                                                                                                                                                                             | <b>Location in manuscript where items are reported</b> |
|---------------------------|----------------|---------------------------------------------------------------------------------------------------------------------------------------------------------------------------------------------------|--------------------------------------------------------|
| <b>Title and abstract</b> | 1              | (a) Indicate the study's design with a commonly used term in the title or the abstract                                                                                                            | Abstract: Methods and Findings                         |
|                           |                | (b) Provide in the abstract an informative and balanced summary of what was done and what was found                                                                                               | Abstract: Methods and Findings                         |
| <b>Introduction</b>       |                |                                                                                                                                                                                                   |                                                        |
| Background/rationale      | 2              | Explain the scientific background and rationale for the investigation being reported                                                                                                              | Introduction: P1 & P2                                  |
| Objectives                | 3              | State specific objectives, including any prespecified hypotheses                                                                                                                                  | Introduction: P3                                       |
| <b>Methods</b>            |                |                                                                                                                                                                                                   |                                                        |
| Study design              | 4              | Present key elements of study design early in the paper                                                                                                                                           | Data and methods: P1-P3                                |
| Setting                   | 5              | Describe the setting, locations, and relevant dates, including periods of recruitment, exposure, follow-up, and data collection                                                                   | Data and methods: P1 & P3 & S2 Table & S3 Table        |
| Participants              | 6              | (a) Give the eligibility criteria, and the sources and methods of selection of participants                                                                                                       | Data and methods: P1 & P3                              |
| Variables                 | 7              | Clearly define all outcomes, exposures, predictors, potential confounders, and effect modifiers. Give diagnostic criteria, if applicable                                                          | Data and methods: P4 & P5                              |
| Data sources/measurement  | 8              | For each variable of interest, give sources of data and details of methods of assessment (measurement). Describe comparability of assessment methods if there is more than one group              | Data and methods: P1 & P4-P6                           |
| Bias                      | 9              | Describe any efforts to address potential sources of bias                                                                                                                                         | Data and methods: P4                                   |
| Study size                | 10             | Explain how the study size was arrived at                                                                                                                                                         | Data and methods: P5                                   |
| Quantitative variables    | 11             | Explain how quantitative variables were handled in the analyses. If applicable, describe which groupings were chosen and why                                                                      | Data and methods: P4-P6                                |
| Statistical methods       | 12             | (a) Describe all statistical methods, including those used to control for confounding                                                                                                             | Data and methods: P7-P12                               |
|                           |                | (b) Describe any methods used to examine subgroups and interactions                                                                                                                               | NA                                                     |
|                           |                | (c) Explain how missing data were addressed                                                                                                                                                       | Data and methods: P5                                   |
|                           |                | (d) If applicable, describe analytical methods taking account of sampling strategy                                                                                                                | Data and methods: P1, P8 & P10                         |
|                           |                | (e) Describe any sensitivity analyses                                                                                                                                                             | Data and methods: P4                                   |
| <b>Results</b>            |                |                                                                                                                                                                                                   |                                                        |
| Participants              | 13*            | (a) Report numbers of individuals at each stage of study—eg numbers potentially eligible, examined for eligibility, confirmed eligible, included in the study, completing follow-up, and analysed | Data and methods: P5 & S2 Table                        |
|                           |                | (b) Give reasons for non-participation at each stage                                                                                                                                              |                                                        |
|                           |                | (c) Consider use of a flow diagram                                                                                                                                                                |                                                        |

|                          |    |                                                                                                                                                                                                                                     |                                        |
|--------------------------|----|-------------------------------------------------------------------------------------------------------------------------------------------------------------------------------------------------------------------------------------|----------------------------------------|
| Descriptive data         | 14 | (a) Give characteristics of study participants (eg demographic, clinical, social) and information on exposures and potential confounders<br><br>(b) Indicate number of participants with missing data for each variable of interest | NA                                     |
| Outcome data             | 15 | Report numbers of outcome events or summary measures                                                                                                                                                                                | NA                                     |
| Main results             | 16 | (a) Give unadjusted estimates and, if applicable, confounder-adjusted estimates and their precision (eg, 95% confidence interval). Make clear which confounders were adjusted for and why they were included                        | Results: Table 1 & S3 Table            |
|                          |    | (b) Report category boundaries when continuous variables were categorized                                                                                                                                                           | NA                                     |
|                          |    | (c) If relevant, consider translating estimates of relative risk into absolute risk for a meaningful time period                                                                                                                    | NA                                     |
| Other analyses           | 17 | Report other analyses done—eg analyses of subgroups and interactions, and sensitivity analyses                                                                                                                                      | Results: P11 and S3 Table and S4 Table |
| <b>Discussion</b>        |    |                                                                                                                                                                                                                                     |                                        |
| Key results              | 18 | Summarise key results with reference to study objectives                                                                                                                                                                            | Discussion: P2-P5                      |
| Limitations              | 19 | Discuss limitations of the study, taking into account sources of potential bias or imprecision. Discuss both direction and magnitude of any potential bias                                                                          | Discussion: P6                         |
| Interpretation           | 20 | Give a cautious overall interpretation of results considering objectives, limitations, multiplicity of analyses, results from similar studies, and other relevant evidence                                                          | Discussion: P4, P5 & P8                |
| Generalisability         | 21 | Discuss the generalisability (external validity) of the study results                                                                                                                                                               | Discussion: P4, P5 & P8                |
| <b>Other information</b> |    |                                                                                                                                                                                                                                     |                                        |
| Funding                  | 22 | Give the source of funding and the role of the funders for the present study and, if applicable, for the original study on which the present article is based                                                                       | Funding Statement                      |

The STROBE checklist was retrieved from <https://www.strobe-statement.org/checklists/> (accessed: Nov 9 2022). Information on the STROBE Initiative is available at [www.strobe-statement.org](http://www.strobe-statement.org).
