# Supplementary material for: Essential childhood immunization in 43 low- and middle-income countries: Analysis of spatial trends and socioeconomic inequalities in vaccine coverage
Source: PubMed Central journal article supplement (PMC9888726; doi:10.1371/journal.pmed.1004166), 2023-01-17
Supplement: pmed.1004166.s002.pdf [file pmed.1004166.s002.pdf]

**Table S2.** Overview of DHS surveys included in the analysis. The subnational units are states, regions, or districts, depending on the survey. The sample includes children between 15 and 35 months of age.

| Country      | Country code | Survey year | Sample size | Administrative divisions (n) |
|--------------|--------------|-------------|-------------|------------------------------|
| Afghanistan  | AF           | 2015        | 10597       | 34                           |
| Albania      | AL           | 2017-18     | 865         | 12                           |
| Angola       | AO           | 2015-16     | 4797        | 18                           |
| Armenia      | AM           | 2015-16     | 595         | 11                           |
| Bangladesh   | BD           | 2017-18     | 2883        | 8                            |
| Benin        | BJ           | 2017-18     | 4283        | 12                           |
| Burundi      | BU           | 2016-17     | 4319        | 18                           |
| Cambodia     | KH           | 2014        | 2487        | 19                           |
| Cameroon     | CM           | 2018-19     | 3090        | 12                           |
| Chad         | TD           | 2014-15     | 5172        | 21                           |
| Egypt        | EG           | 2014        | 5569        | 25                           |
| Ethiopia     | ET           | 2019        | 1801        | 11                           |
| Ghana        | GH           | 2014        | 1987        | 10                           |
| Guatemala    | GU           | 2014-15     | 4221        | 22                           |
| Guinea       | GN           | 2018        | 2135        | 8                            |
| Haiti        | HT           | 2016-17     | 2090        | 11                           |
| India        | IA           | 2019-21     | 76079       | 707                          |
| Indonesia    | ID           | 2017        | 6043        | 34                           |
| Jordan       | JO           | 2017-18     | 3558        | 12                           |
| Kenya        | KE           | 2014        | 6940        | 47                           |
| Lesotho      | LS           | 2014        | 1029        | 10                           |
| Liberia      | LB           | 2019-20     | 1771        | 15                           |
| Madagascar   | MD           | 2021        | 4006        | 23                           |
| Malawi       | MW           | 2015-16     | 5623        | 28                           |
| Maldives     | MV           | 2016-17     | 1019        | 6                            |
| Mali         | ML           | 2018        | 3224        | 9                            |
| Mauritania   | MR           | 2019-21     | 3745        | 14                           |
| Myanmar      | MM           | 2015-16     | 1556        | 15                           |
| Nepal        | NP           | 2016        | 1710        | 7                            |
| Nigeria      | NG           | 2018        | 10212       | 37                           |
| Pakistan     | PK           | 2017-18     | 4075        | 8                            |
| Philippines  | PH           | 2017        | 3523        | 17                           |
| Rwanda       | RW           | 2019-20     | 2729        | 5                            |
| Senegal      | SN           | 2019        | 2103        | 4                            |
| Sierra Leone | SL           | 2019        | 3030        | 16                           |
| South Africa | ZA           | 2016        | 1176        | 9                            |
| Tajikistan   | TJ           | 2017        | 2190        | 5                            |
| Tanzania     | TZ           | 2015-16     | 3484        | 30                           |
| The Gambia   | GM           | 2019-20     | 2649        | 8                            |
| Timor-Leste  | TL           | 2016        | 2416        | 13                           |
| Uganda       | UG           | 2016        | 5127        | 15                           |
| Zambia       | ZM           | 2018-19     | 3323        | 10                           |
| Zimbabwe     | ZW           | 2015        | 2009        | 10                           |
