# Supplementary material for: Essential childhood immunization in 43 low- and middle-income countries: Analysis of spatial trends and socioeconomic inequalities in vaccine coverage
Source: PubMed Central journal article supplement (PMC9888726; doi:10.1371/journal.pmed.1004166), 2023-01-17
Supplement: pmed.1004166.s005.pdf [file pmed.1004166.s005.pdf]

**Table S5.** Subnational estimates of full immunization coverage (FIC), Wagstaff's (W) and Erreygers' (E) indices of inequality. The lower and upper bounds refer to the 95% confidence intervals of W and E. Sampling weights were applied in all calculations.

| Country     | Region         | Sample size | FIC   | W      | Lower bound | Upper bound | E      | Lower bound | Upper bound |
|-------------|----------------|-------------|-------|--------|-------------|-------------|--------|-------------|-------------|
| Afghanistan | Badakhshan     | 279         | 0.654 | -0.024 | -0.168      | 0.119       | -0.022 | -0.152      | 0.108       |
| Afghanistan | Badghis        | 372         | 0.571 | 0.086  | -0.033      | 0.204       | 0.084  | -0.032      | 0.200       |
| Afghanistan | Baghlan        | 253         | 0.370 | 0.171  | 0.024       | 0.318       | 0.159  | 0.023       | 0.296       |
| Afghanistan | Balkh          | 348         | 0.354 | 0.375  | 0.254       | 0.496       | 0.343  | 0.233       | 0.454       |
| Afghanistan | Bamyan         | 240         | 0.641 | 0.108  | -0.045      | 0.260       | 0.099  | -0.041      | 0.240       |
| Afghanistan | Daykundi       | 206         | 0.320 | 0.015  | -0.155      | 0.185       | 0.013  | -0.135      | 0.161       |
| Afghanistan | Farah          | 428         | 0.253 | 0.510  | 0.393       | 0.626       | 0.385  | 0.297       | 0.473       |
| Afghanistan | Faryab         | 280         | 0.602 | 0.213  | 0.077       | 0.350       | 0.204  | 0.074       | 0.335       |
| Afghanistan | Ghazni         | 234         | 0.351 | -0.211 | -0.364      | -0.057      | -0.192 | -0.332      | -0.052      |
| Afghanistan | Ghor           | 360         | 0.277 | 0.186  | 0.054       | 0.318       | 0.149  | 0.043       | 0.255       |
| Afghanistan | Helmand        | 300         | 0.176 | -0.021 | -0.194      | 0.151       | -0.012 | -0.112      | 0.088       |
| Afghanistan | Herat          | 300         | 0.521 | 0.270  | 0.142       | 0.398       | 0.270  | 0.142       | 0.398       |
| Afghanistan | Jawzjan        | 313         | 0.305 | 0.142  | 0.004       | 0.281       | 0.121  | 0.003       | 0.238       |
| Afghanistan | Kabul          | 230         | 0.502 | 0.062  | -0.088      | 0.213       | 0.062  | -0.088      | 0.213       |
| Afghanistan | Kandahar       | 324         | 0.155 | 0.483  | 0.316       | 0.650       | 0.254  | 0.166       | 0.341       |
| Afghanistan | Kapisa         | 297         | 0.606 | 0.161  | 0.027       | 0.295       | 0.154  | 0.026       | 0.282       |
| Afghanistan | Khost          | 613         | 0.297 | 0.052  | -0.049      | 0.152       | 0.043  | -0.041      | 0.127       |
| Afghanistan | Kunarha        | 308         | 0.340 | 0.194  | 0.058       | 0.330       | 0.174  | 0.052       | 0.296       |
| Afghanistan | Kunduz         | 285         | 0.365 | 0.134  | -0.005      | 0.273       | 0.124  | -0.004      | 0.253       |
| Afghanistan | Laghman        | 345         | 0.627 | 0.099  | -0.027      | 0.225       | 0.092  | -0.026      | 0.210       |
| Afghanistan | Logar          | 243         | 0.401 | 0.127  | -0.021      | 0.276       | 0.122  | -0.020      | 0.265       |
| Afghanistan | Nangarhar      | 408         | 0.641 | 0.237  | 0.122       | 0.353       | 0.219  | 0.113       | 0.325       |
| Afghanistan | Nimroz         | 242         | 0.553 | 0.268  | 0.125       | 0.411       | 0.265  | 0.123       | 0.407       |
| Afghanistan | Nooristan      | 646         | 0.002 | -0.150 | -1.085      | 0.784       | -0.001 | -0.010      | 0.007       |
| Afghanistan | Paktika        | 325         | 0.592 | 0.050  | -0.078      | 0.178       | 0.048  | -0.075      | 0.172       |
| Afghanistan | Paktya         | 456         | 0.236 | 0.117  | -0.008      | 0.242       | 0.085  | -0.005      | 0.175       |
| Afghanistan | Panjsher       | 194         | 0.491 | 0.146  | -0.016      | 0.308       | 0.146  | -0.016      | 0.308       |
| Afghanistan | Parwan         | 289         | 0.626 | 0.101  | -0.038      | 0.239       | 0.094  | -0.035      | 0.224       |
| Afghanistan | Samangan       | 246         | 0.201 | 0.328  | 0.151       | 0.505       | 0.211  | 0.097       | 0.324       |
| Afghanistan | Sar-E-Pul      | 265         | 0.358 | 0.275  | 0.133       | 0.416       | 0.252  | 0.122       | 0.383       |
| Afghanistan | Takhar         | 311         | 0.518 | -0.190 | -0.317      | -0.062      | -0.189 | -0.317      | -0.062      |
| Afghanistan | Urozgan        | 432         | 0.022 | 0.233  | -0.143      | 0.609       | 0.020  | -0.012      | 0.051       |
| Afghanistan | Wardak         | 215         | 0.637 | 0.357  | 0.202       | 0.511       | 0.330  | 0.187       | 0.473       |
| Afghanistan | Zabul          | 64          | 0.188 | 0.179  | -0.189      | 0.548       | 0.109  | -0.115      | 0.334       |
| Albania     | Berat          | 78          | 0.947 | 0.210  | -0.383      | 0.803       | 0.042  | -0.077      | 0.161       |
| Albania     | Dibër          | 118         | 0.854 | -0.124 | -0.426      | 0.178       | -0.062 | -0.212      | 0.089       |
| Albania     | Durrës         | 80          | 0.923 | 0.285  | -0.225      | 0.796       | 0.081  | -0.064      | 0.226       |
| Albania     | Elbasan        | 80          | 0.853 | -0.073 | -0.463      | 0.317       | -0.036 | -0.232      | 0.159       |
| Albania     | Fier           | 76          | 0.929 | 0.418  | -0.121      | 0.957       | 0.110  | -0.032      | 0.251       |
| Albania     | Gjirokastër    | 67          | 0.899 | 0.486  | -0.010      | 0.981       | 0.176  | -0.003      | 0.355       |
| Albania     | Korçë          | 85          | 1.000 | 0.000  | 0.000       | 0.000       | 0.000  | 0.000       | 0.000       |
| Albania     | Kukes          | 104         | 0.907 | -0.080 | -0.483      | 0.324       | -0.027 | -0.163      | 0.109       |
| Albania     | Lezhë          | 80          | 0.847 | -0.341 | -0.702      | 0.021       | -0.177 | -0.365      | 0.011       |
| Albania     | Shkodër        | 65          | 0.978 | -0.641 | -1.698      | 0.417       | -0.056 | -0.148      | 0.036       |
| Albania     | Tirana         | 79          | 0.878 | -0.514 | -0.930      | -0.098      | -0.221 | -0.400      | -0.042      |
| Albania     | Vlorë          | 57          | 0.911 | -0.553 | -1.099      | -0.006      | -0.179 | -0.355      | -0.002      |
| Angola      | Bengo          | 196         | 0.186 | 0.392  | 0.191       | 0.594       | 0.238  | 0.116       | 0.360       |
| Angola      | Benguela       | 286         | 0.277 | 0.450  | 0.309       | 0.591       | 0.360  | 0.248       | 0.473       |
| Angola      | Bié            | 284         | 0.114 | 0.585  | 0.384       | 0.786       | 0.236  | 0.155       | 0.317       |
| Angola      | Cabinda        | 202         | 0.284 | 0.354  | 0.183       | 0.524       | 0.288  | 0.149       | 0.426       |
| Angola      | Cuando Cubango | 222         | 0.036 | 0.492  | 0.085       | 0.898       | 0.068  | 0.012       | 0.123       |
| Angola      | Cuanza Norte   | 219         | 0.234 | 0.134  | -0.047      | 0.314       | 0.096  | -0.034      | 0.225       |
| Angola      | Cuanza Sul     | 256         | 0.184 | 0.297  | 0.118       | 0.477       | 0.178  | 0.071       | 0.286       |
| Angola      | Cunene         | 275         | 0.397 | -0.042 | -0.182      | 0.098       | -0.041 | -0.174      | 0.093       |
| Angola      | Huambo         | 308         | 0.245 | 0.253  | 0.105       | 0.400       | 0.187  | 0.078       | 0.296       |
| Angola      | Huíla          | 285         | 0.220 | 0.515  | 0.364       | 0.666       | 0.353  | 0.249       | 0.457       |

|            |                   |     |       |        |        |        |        |        |        |
|------------|-------------------|-----|-------|--------|--------|--------|--------|--------|--------|
| Angola     | Luanda            | 409 | 0.432 | 0.354  | 0.246  | 0.462  | 0.348  | 0.242  | 0.453  |
| Angola     | Lunda Norte       | 283 | 0.188 | 0.377  | 0.209  | 0.544  | 0.230  | 0.128  | 0.332  |
| Angola     | Lunda Sul         | 291 | 0.214 | 0.289  | 0.130  | 0.447  | 0.194  | 0.087  | 0.301  |
| Angola     | Malanje           | 275 | 0.333 | 0.272  | 0.131  | 0.414  | 0.242  | 0.116  | 0.368  |
| Angola     | Moxico            | 208 | 0.090 | 0.407  | 0.137  | 0.676  | 0.133  | 0.045  | 0.222  |
| Angola     | Namibe            | 266 | 0.271 | 0.331  | 0.180  | 0.483  | 0.262  | 0.142  | 0.381  |
| Angola     | Uíge              | 274 | 0.145 | 0.399  | 0.210  | 0.589  | 0.198  | 0.104  | 0.291  |
| Angola     | Zaire             | 258 | 0.382 | 0.060  | -0.085 | 0.205  | 0.057  | -0.081 | 0.194  |
| Armenia    | Aragatsotn        | 23  | 0.804 | -0.683 | -1.230 | -0.136 | -0.431 | -0.776 | -0.086 |
| Armenia    | Ararat            | 79  | 0.896 | -0.462 | -0.872 | -0.051 | -0.171 | -0.324 | -0.019 |
| Armenia    | Armavir           | 71  | 0.934 | 0.282  | -0.264 | 0.827  | 0.069  | -0.065 | 0.203  |
| Armenia    | Gegharkunik       | 22  | 0.788 | -0.279 | -0.900 | 0.342  | -0.187 | -0.603 | 0.229  |
| Armenia    | Kotayk            | 77  | 0.962 | 0.560  | -0.114 | 1.234  | 0.081  | -0.017 | 0.179  |
| Armenia    | Lori              | 27  | 0.778 | 0.453  | -0.061 | 0.967  | 0.313  | -0.042 | 0.668  |
| Armenia    | Shirak            | 59  | 0.930 | -0.096 | -0.683 | 0.490  | -0.025 | -0.178 | 0.128  |
| Armenia    | Syunik            | 32  | 0.795 | -0.366 | -0.861 | 0.129  | -0.238 | -0.560 | 0.084  |
| Armenia    | Tavush            | 60  | 0.893 | -0.063 | -0.543 | 0.416  | -0.024 | -0.208 | 0.160  |
| Armenia    | Vayots Dzor       | 47  | 0.963 | -0.655 | -1.531 | 0.221  | -0.093 | -0.217 | 0.031  |
| Armenia    | Yerevan           | 99  | 0.863 | -0.341 | -0.669 | -0.014 | -0.161 | -0.316 | -0.007 |
| Bangladesh | Barisal           | 272 | 0.877 | 0.199  | -0.010 | 0.407  | 0.085  | -0.004 | 0.175  |
| Bangladesh | Chittagong        | 506 | 0.903 | 0.193  | 0.023  | 0.363  | 0.067  | 0.008  | 0.127  |
| Bangladesh | Dhaka             | 439 | 0.908 | 0.147  | -0.040 | 0.334  | 0.049  | -0.013 | 0.111  |
| Bangladesh | Khulna            | 287 | 0.925 | 0.194  | -0.059 | 0.448  | 0.054  | -0.016 | 0.124  |
| Bangladesh | Mymensingh        | 345 | 0.892 | -0.087 | -0.284 | 0.110  | -0.034 | -0.109 | 0.042  |
| Bangladesh | Rajshahi          | 307 | 0.922 | 0.245  | 0.005  | 0.485  | 0.070  | 0.001  | 0.139  |
| Bangladesh | Rangpur           | 314 | 0.943 | 0.276  | 0.002  | 0.550  | 0.060  | 0.000  | 0.119  |
| Bangladesh | Sylhet            | 415 | 0.861 | 0.099  | -0.062 | 0.260  | 0.047  | -0.030 | 0.124  |
| Benin      | Alibori           | 478 | 0.441 | 0.260  | 0.158  | 0.362  | 0.256  | 0.156  | 0.357  |
| Benin      | Atacora           | 415 | 0.670 | 0.133  | 0.015  | 0.250  | 0.117  | 0.013  | 0.222  |
| Benin      | Atlantic          | 416 | 0.586 | 0.051  | -0.062 | 0.163  | 0.049  | -0.060 | 0.159  |
| Benin      | Borgou            | 562 | 0.398 | 0.372  | 0.280  | 0.465  | 0.357  | 0.268  | 0.446  |
| Benin      | Collines          | 326 | 0.662 | 0.172  | 0.041  | 0.304  | 0.154  | 0.036  | 0.272  |
| Benin      | Couffo            | 277 | 0.356 | 0.163  | 0.021  | 0.304  | 0.149  | 0.020  | 0.278  |
| Benin      | Donga             | 319 | 0.582 | 0.277  | 0.151  | 0.402  | 0.269  | 0.147  | 0.391  |
| Benin      | Littoral          | 303 | 0.651 | 0.136  | 0.000  | 0.272  | 0.123  | 0.000  | 0.247  |
| Benin      | Mono              | 214 | 0.712 | 0.009  | -0.163 | 0.180  | 0.007  | -0.133 | 0.148  |
| Benin      | Oueme             | 317 | 0.684 | 0.028  | -0.109 | 0.166  | 0.025  | -0.094 | 0.143  |
| Benin      | Plateau           | 256 | 0.369 | -0.065 | -0.212 | 0.082  | -0.061 | -0.198 | 0.076  |
| Benin      | Zou               | 400 | 0.671 | 0.007  | -0.114 | 0.127  | 0.006  | -0.101 | 0.112  |
| Burundi    | Bubanza           | 267 | 0.783 | -0.266 | -0.431 | -0.100 | -0.181 | -0.293 | -0.068 |
| Burundi    | Bujumbura Mairie  | 185 | 0.721 | 0.189  | 0.004  | 0.373  | 0.152  | 0.003  | 0.300  |
| Burundi    | Bujumbura Rural   | 238 | 0.836 | 0.254  | 0.057  | 0.450  | 0.139  | 0.031  | 0.247  |
| Burundi    | Bururi            | 181 | 0.862 | 0.103  | -0.142 | 0.347  | 0.049  | -0.068 | 0.166  |
| Burundi    | Cankuzo           | 230 | 0.880 | 0.260  | 0.032  | 0.488  | 0.110  | 0.014  | 0.207  |
| Burundi    | Cibitoke          | 261 | 0.629 | 0.034  | -0.111 | 0.180  | 0.032  | -0.104 | 0.168  |
| Burundi    | Gitega            | 252 | 0.898 | 0.216  | -0.019 | 0.451  | 0.079  | -0.007 | 0.165  |
| Burundi    | Karusi            | 251 | 0.891 | 0.117  | -0.113 | 0.347  | 0.045  | -0.044 | 0.134  |
| Burundi    | Kayanza           | 237 | 0.880 | -0.306 | -0.530 | -0.082 | -0.129 | -0.223 | -0.035 |
| Burundi    | Kirundo           | 284 | 0.858 | 0.309  | 0.119  | 0.499  | 0.150  | 0.058  | 0.243  |
| Burundi    | Makamba           | 247 | 0.926 | 0.238  | -0.037 | 0.514  | 0.065  | -0.010 | 0.140  |
| Burundi    | Muramvya          | 211 | 0.893 | 0.063  | -0.189 | 0.316  | 0.024  | -0.073 | 0.121  |
| Burundi    | Muyinga           | 290 | 0.910 | -0.007 | -0.240 | 0.226  | -0.002 | -0.079 | 0.074  |
| Burundi    | Mwaro             | 190 | 0.841 | -0.235 | -0.458 | -0.012 | -0.126 | -0.245 | -0.006 |
| Burundi    | Ngozi             | 248 | 0.797 | 0.002  | -0.177 | 0.181  | 0.001  | -0.115 | 0.117  |
| Burundi    | Rumonge           | 255 | 0.814 | 0.089  | -0.093 | 0.272  | 0.054  | -0.057 | 0.165  |
| Burundi    | Rutana            | 225 | 0.902 | -0.024 | -0.279 | 0.231  | -0.008 | -0.099 | 0.082  |
| Burundi    | Ruyigi            | 267 | 0.825 | 0.088  | -0.094 | 0.271  | 0.051  | -0.054 | 0.157  |
| Cambodia   | Banteay Meanchey  | 115 | 0.927 | 0.195  | -0.214 | 0.603  | 0.052  | -0.058 | 0.163  |
| Cambodia   | Battambang/Pailin | 106 | 0.906 | 0.431  | 0.061  | 0.802  | 0.147  | 0.021  | 0.274  |
| Cambodia   | Kampong Cham      | 130 | 0.694 | 0.244  | 0.031  | 0.457  | 0.207  | 0.026  | 0.388  |
| Cambodia   | Kampong Chhnang   | 99  | 0.879 | 0.138  | -0.213 | 0.489  | 0.059  | -0.091 | 0.208  |
| Cambodia   | Kampong Speu      | 143 | 0.779 | 0.320  | 0.097  | 0.544  | 0.221  | 0.067  | 0.374  |
| Cambodia   | Kampong Thom      | 132 | 0.874 | 0.115  | -0.184 | 0.414  | 0.050  | -0.081 | 0.182  |

|          |                          |     |       |        |        |        |        |        |        |
|----------|--------------------------|-----|-------|--------|--------|--------|--------|--------|--------|
| Cambodia | Kampot/Kep               | 102 | 0.712 | 0.445  | 0.211  | 0.680  | 0.365  | 0.173  | 0.557  |
| Cambodia | Kandal                   | 108 | 0.779 | 0.550  | 0.307  | 0.794  | 0.379  | 0.211  | 0.546  |
| Cambodia | Kratie                   | 159 | 0.734 | 0.364  | 0.168  | 0.561  | 0.284  | 0.131  | 0.438  |
| Cambodia | Mondul Kiri/Ratanak Kiri | 171 | 0.560 | 0.492  | 0.333  | 0.651  | 0.485  | 0.329  | 0.642  |
| Cambodia | Otdar Meanchey           | 137 | 0.796 | 0.072  | -0.170 | 0.313  | 0.047  | -0.110 | 0.203  |
| Cambodia | Phnom Penh               | 170 | 0.928 | 0.383  | 0.050  | 0.717  | 0.102  | 0.013  | 0.191  |
| Cambodia | Preah Sihanouk/Koh Kong  | 136 | 0.874 | 0.032  | -0.262 | 0.327  | 0.014  | -0.115 | 0.144  |
| Cambodia | Preah Vihear/Stung Treng | 186 | 0.700 | 0.263  | 0.085  | 0.441  | 0.221  | 0.071  | 0.370  |
| Cambodia | Prey Veng                | 106 | 0.713 | 0.307  | 0.069  | 0.545  | 0.251  | 0.056  | 0.446  |
| Cambodia | Pursat                   | 143 | 0.856 | 0.500  | 0.242  | 0.759  | 0.247  | 0.119  | 0.374  |
| Cambodia | Siem Reap                | 133 | 0.798 | -0.067 | -0.313 | 0.180  | -0.043 | -0.201 | 0.116  |
| Cambodia | Svay Rieng               | 108 | 0.824 | 0.084  | -0.204 | 0.372  | 0.049  | -0.119 | 0.216  |
| Cambodia | Takeo                    | 103 | 0.865 | 0.058  | -0.272 | 0.388  | 0.027  | -0.126 | 0.181  |
| Cameroon | Adamawa                  | 213 | 0.327 | 0.116  | -0.049 | 0.281  | 0.102  | -0.044 | 0.248  |
| Cameroon | Centre                   | 361 | 0.630 | 0.060  | -0.063 | 0.184  | 0.056  | -0.059 | 0.171  |
| Cameroon | Douala                   | 185 | 0.645 | 0.151  | -0.022 | 0.324  | 0.138  | -0.021 | 0.297  |
| Cameroon | East                     | 311 | 0.581 | 0.310  | 0.184  | 0.435  | 0.301  | 0.179  | 0.424  |
| Cameroon | Far North                | 399 | 0.437 | 0.239  | 0.127  | 0.351  | 0.235  | 0.125  | 0.345  |
| Cameroon | Littoral                 | 169 | 0.547 | 0.114  | -0.061 | 0.289  | 0.113  | -0.061 | 0.286  |
| Cameroon | North                    | 385 | 0.323 | 0.118  | -0.005 | 0.241  | 0.103  | -0.005 | 0.211  |
| Cameroon | Northwest                | 162 | 0.617 | 0.237  | 0.056  | 0.417  | 0.224  | 0.053  | 0.394  |
| Cameroon | South                    | 296 | 0.633 | 0.215  | 0.080  | 0.349  | 0.200  | 0.074  | 0.325  |
| Cameroon | Southwest                | 46  | 0.656 | 0.004  | -0.355 | 0.363  | 0.004  | -0.320 | 0.328  |
| Cameroon | West                     | 313 | 0.602 | 0.249  | 0.121  | 0.378  | 0.239  | 0.116  | 0.362  |
| Cameroon | Yaounde                  | 250 | 0.567 | 0.195  | 0.052  | 0.338  | 0.192  | 0.051  | 0.332  |
| Chad     | Barh El Gazal            | 232 | 0.125 | 0.353  | 0.132  | 0.574  | 0.155  | 0.058  | 0.252  |
| Chad     | Batha                    | 203 | 0.037 | 0.607  | 0.188  | 1.025  | 0.086  | 0.027  | 0.145  |
| Chad     | Borkou/Tibesti           | 156 | 0.121 | 0.014  | -0.269 | 0.296  | 0.006  | -0.114 | 0.126  |
| Chad     | Chari Baguirmi           | 257 | 0.043 | 0.108  | -0.249 | 0.466  | 0.018  | -0.041 | 0.077  |
| Chad     | Ennedi Est/Ennedi Ouest  | 195 | 0.111 | -0.238 | -0.499 | 0.023  | -0.094 | -0.197 | 0.009  |
| Chad     | Guéra                    | 284 | 0.176 | 0.449  | 0.277  | 0.620  | 0.260  | 0.161  | 0.360  |
| Chad     | Hadjer-Lamis             | 256 | 0.240 | 0.182  | 0.016  | 0.347  | 0.132  | 0.012  | 0.253  |
| Chad     | Kanem                    | 270 | 0.111 | -0.019 | -0.241 | 0.202  | -0.008 | -0.095 | 0.080  |
| Chad     | Lac                      | 218 | 0.145 | 0.157  | -0.062 | 0.377  | 0.078  | -0.031 | 0.187  |
| Chad     | Logone Occidental        | 235 | 0.308 | 0.146  | -0.017 | 0.308  | 0.124  | -0.014 | 0.263  |
| Chad     | Logone Oriental          | 266 | 0.302 | 0.120  | -0.037 | 0.278  | 0.101  | -0.032 | 0.234  |
| Chad     | Mandoul                  | 286 | 0.544 | 0.036  | -0.102 | 0.173  | 0.035  | -0.101 | 0.172  |
| Chad     | Mayo Kebbi Est           | 317 | 0.321 | 0.201  | 0.065  | 0.337  | 0.175  | 0.056  | 0.294  |
| Chad     | Mayo Kebbi Ouest         | 352 | 0.566 | -0.024 | -0.147 | 0.099  | -0.024 | -0.144 | 0.097  |
| Chad     | Moyen Chari              | 227 | 0.319 | 0.112  | -0.054 | 0.278  | 0.097  | -0.047 | 0.242  |
| Chad     | N'djaména                | 357 | 0.287 | 0.103  | -0.035 | 0.241  | 0.084  | -0.028 | 0.197  |
| Chad     | Ouaddaï                  | 222 | 0.069 | 0.211  | -0.093 | 0.514  | 0.054  | -0.024 | 0.131  |
| Chad     | Salamat                  | 308 | 0.119 | 0.146  | -0.054 | 0.345  | 0.061  | -0.023 | 0.145  |
| Chad     | Sila                     | 215 | 0.110 | 0.292  | 0.043  | 0.541  | 0.115  | 0.017  | 0.213  |
| Chad     | Tandjilé                 | 248 | 0.329 | -0.120 | -0.277 | 0.037  | -0.106 | -0.245 | 0.032  |
| Chad     | Wadi Fira                | 233 | 0.061 | 0.139  | -0.173 | 0.451  | 0.032  | -0.040 | 0.104  |
| Egypt    | Alexandria               | 155 | 0.401 | -0.081 | -0.267 | 0.105  | -0.078 | -0.257 | 0.101  |
| Egypt    | Assuit                   | 296 | 0.351 | -0.019 | -0.157 | 0.119  | -0.017 | -0.143 | 0.109  |
| Egypt    | Aswan                    | 227 | 0.655 | 0.105  | -0.053 | 0.263  | 0.095  | -0.048 | 0.238  |
| Egypt    | Behera                   | 283 | 0.455 | 0.108  | -0.027 | 0.243  | 0.107  | -0.027 | 0.241  |
| Egypt    | Beni Suef                | 244 | 0.371 | 0.086  | -0.066 | 0.237  | 0.080  | -0.062 | 0.222  |
| Egypt    | Cairo                    | 246 | 0.504 | -0.023 | -0.169 | 0.122  | -0.023 | -0.169 | 0.122  |
| Egypt    | Dakahlia                 | 205 | 0.379 | 0.170  | 0.007  | 0.333  | 0.160  | 0.007  | 0.314  |
| Egypt    | Damietta                 | 215 | 0.471 | 0.028  | -0.132 | 0.188  | 0.028  | -0.132 | 0.187  |
| Egypt    | Fayoum                   | 269 | 0.266 | 0.113  | -0.043 | 0.270  | 0.088  | -0.034 | 0.211  |
| Egypt    | Gharbia                  | 209 | 0.483 | 0.005  | -0.152 | 0.163  | 0.005  | -0.152 | 0.162  |
| Egypt    | Giza                     | 245 | 0.556 | 0.011  | -0.138 | 0.159  | 0.010  | -0.137 | 0.157  |
| Egypt    | Ismailia                 | 233 | 0.414 | 0.280  | 0.133  | 0.427  | 0.272  | 0.129  | 0.414  |
| Egypt    | Kafr El-Sheikh           | 212 | 0.506 | 0.017  | -0.139 | 0.173  | 0.017  | -0.139 | 0.173  |
| Egypt    | Kalyubia                 | 207 | 0.385 | -0.210 | -0.372 | -0.049 | -0.199 | -0.352 | -0.046 |
| Egypt    | Luxor                    | 224 | 0.589 | -0.195 | -0.348 | -0.043 | -0.189 | -0.337 | -0.041 |
| Egypt    | Matroh                   | 172 | 0.607 | 0.111  | -0.066 | 0.288  | 0.106  | -0.063 | 0.275  |
| Egypt    | Menoufia                 | 213 | 0.376 | 0.143  | -0.017 | 0.302  | 0.134  | -0.016 | 0.284  |

|           |                   |     |       |        |        |        |        |        |        |
|-----------|-------------------|-----|-------|--------|--------|--------|--------|--------|--------|
| Egypt     | Menya             | 235 | 0.388 | -0.063 | -0.218 | 0.091  | -0.060 | -0.207 | 0.086  |
| Egypt     | New Valley        | 120 | 0.518 | -0.091 | -0.299 | 0.117  | -0.091 | -0.298 | 0.117  |
| Egypt     | Port Said         | 175 | 0.420 | -0.114 | -0.288 | 0.060  | -0.111 | -0.281 | 0.058  |
| Egypt     | Qena              | 322 | 0.318 | 0.064  | -0.072 | 0.201  | 0.056  | -0.062 | 0.174  |
| Egypt     | Red Sea           | 111 | 0.378 | 0.145  | -0.082 | 0.372  | 0.136  | -0.077 | 0.350  |
| Egypt     | Sharkia           | 263 | 0.280 | 0.080  | -0.076 | 0.236  | 0.065  | -0.061 | 0.190  |
| Egypt     | Souhag            | 300 | 0.400 | 0.184  | 0.050  | 0.318  | 0.177  | 0.048  | 0.305  |
| Egypt     | Suez              | 256 | 0.468 | -0.028 | -0.171 | 0.115  | -0.028 | -0.171 | 0.115  |
| Ethiopia  | Addis Ababa       | 109 | 0.834 | 0.017  | -0.277 | 0.311  | 0.009  | -0.154 | 0.172  |
| Ethiopia  | Afar              | 214 | 0.125 | 0.245  | 0.012  | 0.477  | 0.107  | 0.005  | 0.209  |
| Ethiopia  | Amhara            | 170 | 0.570 | 0.388  | 0.221  | 0.554  | 0.380  | 0.217  | 0.543  |
| Ethiopia  | Benishangul-Gumuz | 160 | 0.600 | 0.171  | -0.011 | 0.353  | 0.164  | -0.010 | 0.339  |
| Ethiopia  | Dire Dawa         | 125 | 0.589 | 0.019  | -0.188 | 0.227  | 0.019  | -0.182 | 0.219  |
| Ethiopia  | Gambela           | 139 | 0.474 | 0.568  | 0.399  | 0.737  | 0.566  | 0.398  | 0.735  |
| Ethiopia  | Harari            | 150 | 0.361 | 0.540  | 0.367  | 0.713  | 0.498  | 0.339  | 0.658  |
| Ethiopia  | Oromia            | 233 | 0.314 | 0.153  | -0.006 | 0.312  | 0.132  | -0.005 | 0.269  |
| Ethiopia  | Snnpr             | 196 | 0.305 | 0.191  | 0.016  | 0.365  | 0.162  | 0.014  | 0.309  |
| Ethiopia  | Somali            | 163 | 0.155 | 0.355  | 0.115  | 0.595  | 0.186  | 0.060  | 0.312  |
| Ethiopia  | Tigray            | 142 | 0.712 | 0.245  | 0.037  | 0.452  | 0.201  | 0.031  | 0.370  |
| Ghana     | Ashanti           | 197 | 0.780 | -0.175 | -0.369 | 0.020  | -0.120 | -0.253 | 0.013  |
| Ghana     | Brong Ahafo       | 234 | 0.821 | -0.035 | -0.228 | 0.159  | -0.020 | -0.134 | 0.094  |
| Ghana     | Central           | 211 | 0.650 | -0.024 | -0.188 | 0.140  | -0.022 | -0.171 | 0.127  |
| Ghana     | Eastern           | 189 | 0.751 | 0.165  | -0.025 | 0.355  | 0.123  | -0.019 | 0.266  |
| Ghana     | Greater Accra     | 160 | 0.795 | -0.015 | -0.238 | 0.208  | -0.010 | -0.155 | 0.135  |
| Ghana     | Northern          | 285 | 0.663 | 0.223  | 0.083  | 0.363  | 0.199  | 0.074  | 0.324  |
| Ghana     | Upper East        | 180 | 0.824 | -0.235 | -0.455 | -0.015 | -0.136 | -0.264 | -0.009 |
| Ghana     | Upper West        | 158 | 0.901 | -0.239 | -0.540 | 0.062  | -0.085 | -0.192 | 0.022  |
| Ghana     | Volta             | 181 | 0.800 | -0.176 | -0.386 | 0.033  | -0.113 | -0.247 | 0.021  |
| Ghana     | Western           | 193 | 0.686 | -0.280 | -0.452 | -0.108 | -0.241 | -0.389 | -0.093 |
| Guatemala | Alta Verapaz      | 223 | 0.722 | 0.077  | -0.092 | 0.247  | 0.062  | -0.074 | 0.198  |
| Guatemala | Baja Verapaz      | 181 | 0.891 | 0.229  | -0.041 | 0.498  | 0.089  | -0.016 | 0.193  |
| Guatemala | Chimaltenango     | 222 | 0.878 | -0.112 | -0.345 | 0.121  | -0.048 | -0.148 | 0.052  |
| Guatemala | Chiquimula        | 202 | 0.876 | -0.116 | -0.358 | 0.126  | -0.050 | -0.156 | 0.055  |
| Guatemala | El Progreso       | 148 | 0.914 | 0.323  | -0.008 | 0.654  | 0.101  | -0.002 | 0.205  |
| Guatemala | Escuintla         | 144 | 0.851 | 0.026  | -0.241 | 0.292  | 0.013  | -0.122 | 0.149  |
| Guatemala | Guatemala         | 338 | 0.837 | 0.131  | -0.035 | 0.298  | 0.072  | -0.019 | 0.163  |
| Guatemala | Huehuetenango     | 217 | 0.755 | 0.134  | -0.045 | 0.312  | 0.099  | -0.033 | 0.231  |
| Guatemala | Izabal            | 158 | 0.714 | 0.169  | -0.030 | 0.367  | 0.138  | -0.025 | 0.300  |
| Guatemala | Jalapa            | 221 | 0.871 | 0.164  | -0.063 | 0.392  | 0.074  | -0.028 | 0.176  |
| Guatemala | Jutiapa           | 182 | 0.881 | 0.215  | -0.043 | 0.473  | 0.090  | -0.018 | 0.199  |
| Guatemala | Petén             | 189 | 0.909 | -0.030 | -0.319 | 0.258  | -0.010 | -0.105 | 0.085  |
| Guatemala | Quetzaltenango    | 166 | 0.793 | -0.052 | -0.270 | 0.166  | -0.034 | -0.177 | 0.109  |
| Guatemala | Quiché            | 276 | 0.876 | -0.181 | -0.387 | 0.025  | -0.079 | -0.168 | 0.011  |
| Guatemala | Retalhuleu        | 166 | 0.840 | -0.290 | -0.527 | -0.053 | -0.156 | -0.284 | -0.029 |
| Guatemala | Sacatepéquez      | 141 | 0.908 | -0.168 | -0.498 | 0.162  | -0.056 | -0.167 | 0.054  |
| Guatemala | San Marcos        | 206 | 0.732 | 0.118  | -0.061 | 0.296  | 0.092  | -0.048 | 0.232  |
| Guatemala | Santa Rosa        | 150 | 0.859 | -0.024 | -0.291 | 0.243  | -0.012 | -0.141 | 0.118  |
| Guatemala | Sololá            | 176 | 0.784 | 0.213  | 0.007  | 0.419  | 0.144  | 0.005  | 0.284  |
| Guatemala | Suchitepéquez     | 177 | 0.816 | -0.068 | -0.288 | 0.153  | -0.041 | -0.173 | 0.092  |
| Guatemala | Totonicapán       | 196 | 0.845 | 0.013  | -0.211 | 0.238  | 0.007  | -0.111 | 0.125  |
| Guatemala | Zacapa            | 142 | 0.888 | 0.188  | -0.114 | 0.490  | 0.075  | -0.045 | 0.195  |
| Guinea    | Boké              | 275 | 0.163 | 0.471  | 0.294  | 0.648  | 0.256  | 0.160  | 0.353  |
| Guinea    | Conakry           | 244 | 0.293 | 0.206  | 0.048  | 0.364  | 0.171  | 0.040  | 0.301  |
| Guinea    | Faranah           | 283 | 0.224 | 0.153  | -0.008 | 0.314  | 0.106  | -0.006 | 0.218  |
| Guinea    | Kankan            | 331 | 0.421 | -0.067 | -0.193 | 0.059  | -0.065 | -0.188 | 0.058  |
| Guinea    | Kindia            | 281 | 0.146 | 0.390  | 0.204  | 0.577  | 0.195  | 0.102  | 0.288  |
| Guinea    | Labé              | 263 | 0.089 | 0.303  | 0.060  | 0.546  | 0.099  | 0.020  | 0.177  |
| Guinea    | Mamou             | 189 | 0.137 | 0.472  | 0.241  | 0.703  | 0.224  | 0.114  | 0.333  |
| Guinea    | N'zérékoré        | 269 | 0.333 | 0.241  | 0.097  | 0.385  | 0.214  | 0.086  | 0.342  |
| Haiti     | Artibonite        | 244 | 0.307 | 0.373  | 0.223  | 0.524  | 0.318  | 0.190  | 0.446  |
| Haiti     | Central           | 224 | 0.423 | 0.128  | -0.024 | 0.281  | 0.125  | -0.024 | 0.275  |
| Haiti     | Grande-Anse       | 179 | 0.413 | 0.177  | 0.006  | 0.347  | 0.171  | 0.006  | 0.337  |
| Haiti     | Metropolitan Area | 197 | 0.441 | 0.344  | 0.188  | 0.500  | 0.339  | 0.185  | 0.493  |

|       |                                                  |     |       |        |        |        |        |        |        |
|-------|--------------------------------------------------|-----|-------|--------|--------|--------|--------|--------|--------|
| Haiti | Nippes                                           | 108 | 0.500 | 0.278  | 0.065  | 0.492  | 0.278  | 0.065  | 0.492  |
| Haiti | North                                            | 231 | 0.572 | 0.261  | 0.114  | 0.409  | 0.256  | 0.112  | 0.400  |
| Haiti | Northeast                                        | 164 | 0.546 | -0.123 | -0.300 | 0.055  | -0.122 | -0.298 | 0.054  |
| Haiti | Northwest                                        | 215 | 0.423 | 0.118  | -0.038 | 0.274  | 0.115  | -0.037 | 0.268  |
| Haiti | South                                            | 153 | 0.492 | 0.475  | 0.307  | 0.643  | 0.475  | 0.307  | 0.643  |
| Haiti | Southeast                                        | 155 | 0.309 | 0.375  | 0.186  | 0.564  | 0.320  | 0.159  | 0.481  |
| Haiti | West                                             | 220 | 0.310 | 0.292  | 0.131  | 0.453  | 0.250  | 0.112  | 0.388  |
| India | Andaman & Nicobar Islands-Nicobars               | 59  | 0.586 | 0.182  | -0.119 | 0.482  | 0.176  | -0.115 | 0.468  |
| India | Andaman & Nicobar Islands-North & Middle Andaman | 33  | 0.848 | 0.487  | -0.052 | 1.026  | 0.251  | -0.027 | 0.529  |
| India | Andaman & Nicobar Islands-South Andaman          | 68  | 0.662 | -0.049 | -0.343 | 0.245  | -0.044 | -0.307 | 0.220  |
| India | Andhra Pradesh-Anantapur                         | 68  | 0.713 | -0.038 | -0.345 | 0.270  | -0.031 | -0.283 | 0.221  |
| India | Andhra Pradesh-Chittoor                          | 77  | 0.654 | 0.110  | -0.164 | 0.383  | 0.099  | -0.148 | 0.347  |
| India | Andhra Pradesh-East Godavari                     | 65  | 0.551 | 0.036  | -0.250 | 0.323  | 0.036  | -0.248 | 0.319  |
| India | Andhra Pradesh-Guntur                            | 72  | 0.677 | -0.010 | -0.299 | 0.280  | -0.008 | -0.261 | 0.245  |
| India | Andhra Pradesh-Krishna                           | 49  | 0.826 | 0.079  | -0.356 | 0.514  | 0.045  | -0.204 | 0.295  |
| India | Andhra Pradesh-Kurnool                           | 98  | 0.559 | 0.233  | 0.005  | 0.461  | 0.230  | 0.005  | 0.454  |
| India | Andhra Pradesh-Prakasam                          | 56  | 0.597 | 0.220  | -0.088 | 0.528  | 0.212  | -0.085 | 0.509  |
| India | Andhra Pradesh-Sri Potti Sriramulu Nellore       | 81  | 0.606 | -0.091 | -0.351 | 0.168  | -0.087 | -0.335 | 0.161  |
| India | Andhra Pradesh-Srikakulam                        | 59  | 0.735 | 0.013  | -0.327 | 0.352  | 0.010  | -0.255 | 0.275  |
| India | Andhra Pradesh-Visakhapatnam                     | 69  | 0.525 | -0.019 | -0.296 | 0.258  | -0.019 | -0.295 | 0.257  |
| India | Andhra Pradesh-Vizianagaram                      | 64  | 0.543 | -0.045 | -0.333 | 0.244  | -0.044 | -0.330 | 0.242  |
| India | Andhra Pradesh-West Godavari                     | 61  | 0.671 | 0.095  | -0.218 | 0.407  | 0.083  | -0.193 | 0.359  |
| India | Andhra Pradesh-Y.s.r.                            | 97  | 0.652 | 0.146  | -0.096 | 0.388  | 0.132  | -0.087 | 0.352  |
| India | Arunachal Pradesh-Anjaw                          | 74  | 0.741 | 0.037  | -0.267 | 0.341  | 0.028  | -0.205 | 0.262  |
| India | Arunachal Pradesh-Changlang                      | 103 | 0.504 | 0.216  | -0.005 | 0.437  | 0.216  | -0.005 | 0.437  |
| India | Arunachal Pradesh-Dibang Valley                  | 61  | 0.800 | 0.196  | -0.169 | 0.561  | 0.126  | -0.108 | 0.359  |
| India | Arunachal Pradesh-East Kameng                    | 125 | 0.460 | -0.008 | -0.213 | 0.196  | -0.008 | -0.212 | 0.195  |
| India | Arunachal Pradesh-East Siang                     | 72  | 0.375 | 0.093  | -0.185 | 0.372  | 0.087  | -0.174 | 0.349  |
| India | Arunachal Pradesh-Kra Daadi                      | 57  | 0.435 | 0.053  | -0.254 | 0.360  | 0.052  | -0.250 | 0.354  |
| India | Arunachal Pradesh-Kurung Kumey                   | 78  | 0.651 | -0.152 | -0.422 | 0.118  | -0.138 | -0.383 | 0.108  |
| India | Arunachal Pradesh-Lohit                          | 109 | 0.479 | 0.274  | 0.061  | 0.487  | 0.273  | 0.061  | 0.486  |
| India | Arunachal Pradesh-Longding                       | 91  | 0.611 | 0.365  | 0.131  | 0.599  | 0.347  | 0.124  | 0.569  |
| India | Arunachal Pradesh-Lower Dibang Valley            | 90  | 0.806 | -0.024 | -0.329 | 0.281  | -0.015 | -0.206 | 0.176  |
| India | Arunachal Pradesh-Lower Subansiri                | 81  | 0.547 | 0.056  | -0.199 | 0.312  | 0.056  | -0.198 | 0.309  |
| India | Arunachal Pradesh-Namsai                         | 124 | 0.500 | 0.255  | 0.056  | 0.455  | 0.255  | 0.056  | 0.455  |
| India | Arunachal Pradesh-Papum Pare                     | 91  | 0.502 | 0.118  | -0.121 | 0.356  | 0.118  | -0.121 | 0.356  |
| India | Arunachal Pradesh-Siang                          | 71  | 0.483 | 0.113  | -0.159 | 0.384  | 0.112  | -0.159 | 0.383  |
| India | Arunachal Pradesh-Tawang                         | 97  | 0.463 | -0.111 | -0.343 | 0.120  | -0.111 | -0.341 | 0.120  |
| India | Arunachal Pradesh-Tirap                          | 99  | 0.559 | -0.035 | -0.266 | 0.196  | -0.034 | -0.262 | 0.194  |
| India | Arunachal Pradesh-Upper Siang                    | 72  | 0.397 | 0.277  | 0.008  | 0.546  | 0.265  | 0.008  | 0.523  |
| India | Arunachal Pradesh-Upper Subansiri                | 144 | 0.662 | 0.308  | 0.113  | 0.502  | 0.275  | 0.102  | 0.449  |
| India | Arunachal Pradesh-West Kameng                    | 67  | 0.269 | 0.036  | -0.281 | 0.352  | 0.028  | -0.221 | 0.277  |
| India | Arunachal Pradesh-West Siang                     | 91  | 0.358 | 0.050  | -0.200 | 0.300  | 0.046  | -0.184 | 0.276  |
| India | Assam-Baksa                                      | 120 | 0.483 | -0.067 | -0.275 | 0.141  | -0.067 | -0.275 | 0.141  |
| India | Assam-Barpeta                                    | 137 | 0.386 | 0.272  | 0.077  | 0.466  | 0.258  | 0.073  | 0.442  |
| India | Assam-Biswanath                                  | 95  | 0.568 | 0.148  | -0.087 | 0.383  | 0.145  | -0.086 | 0.376  |
| India | Assam-Bongaigaon                                 | 113 | 0.385 | -0.096 | -0.316 | 0.124  | -0.091 | -0.299 | 0.117  |
| India | Assam-Cachar                                     | 125 | 0.395 | -0.161 | -0.367 | 0.046  | -0.154 | -0.351 | 0.044  |
| India | Assam-Charaideo                                  | 88  | 0.486 | 0.022  | -0.222 | 0.266  | 0.022  | -0.222 | 0.266  |
| India | Assam-Chirang                                    | 117 | 0.428 | -0.054 | -0.267 | 0.159  | -0.053 | -0.261 | 0.156  |
| India | Assam-Darrang                                    | 128 | 0.424 | 0.099  | -0.104 | 0.302  | 0.097  | -0.102 | 0.295  |
| India | Assam-Dhemaji                                    | 94  | 0.336 | 0.194  | -0.052 | 0.441  | 0.173  | -0.047 | 0.393  |
| India | Assam-Dhubri                                     | 146 | 0.522 | 0.199  | 0.013  | 0.385  | 0.199  | 0.013  | 0.384  |
| India | Assam-Dibrugarh                                  | 93  | 0.548 | -0.239 | -0.472 | -0.006 | -0.237 | -0.468 | -0.006 |
| India | Assam-Dima Hasao                                 | 86  | 0.381 | -0.076 | -0.330 | 0.177  | -0.072 | -0.311 | 0.167  |
| India | Assam-Goalpara                                   | 118 | 0.468 | 0.083  | -0.127 | 0.293  | 0.082  | -0.127 | 0.292  |
| India | Assam-Golaghat                                   | 75  | 0.549 | 0.288  | 0.030  | 0.546  | 0.285  | 0.030  | 0.540  |
| India | Assam-Hailakandi                                 | 122 | 0.415 | -0.024 | -0.234 | 0.185  | -0.024 | -0.227 | 0.180  |
| India | Assam-Hojai                                      | 117 | 0.430 | 0.124  | -0.088 | 0.336  | 0.122  | -0.086 | 0.330  |
| India | Assam-Jorhat                                     | 91  | 0.486 | -0.279 | -0.512 | -0.046 | -0.279 | -0.512 | -0.046 |
| India | Assam-Kamrup                                     | 96  | 0.350 | 0.035  | -0.210 | 0.279  | 0.031  | -0.191 | 0.254  |
| India | Assam-Kamrup Metropolitan                        | 69  | 0.312 | 0.112  | -0.186 | 0.409  | 0.096  | -0.159 | 0.351  |

|       |                               |     |       |        |        |       |        |        |       |
|-------|-------------------------------|-----|-------|--------|--------|-------|--------|--------|-------|
| India | Assam-Karbi Anglong           | 102 | 0.313 | -0.008 | -0.252 | 0.236 | -0.007 | -0.217 | 0.203 |
| India | Assam-Karimganj               | 144 | 0.404 | 0.172  | -0.019 | 0.364 | 0.166  | -0.018 | 0.350 |
| India | Assam-Kokrajhar               | 103 | 0.312 | -0.176 | -0.417 | 0.065 | -0.151 | -0.357 | 0.056 |
| India | Assam-Lakhimpur               | 90  | 0.545 | -0.065 | -0.307 | 0.177 | -0.064 | -0.304 | 0.175 |
| India | Assam-Majuli                  | 93  | 0.356 | 0.214  | -0.030 | 0.458 | 0.196  | -0.028 | 0.420 |
| India | Assam-Morigaon                | 128 | 0.523 | 0.118  | -0.082 | 0.319 | 0.118  | -0.082 | 0.318 |
| India | Assam-Nagaon                  | 143 | 0.417 | 0.050  | -0.143 | 0.243 | 0.049  | -0.139 | 0.236 |
| India | Assam-Nalbari                 | 77  | 0.430 | 0.094  | -0.169 | 0.357 | 0.093  | -0.165 | 0.351 |
| India | Assam-Sivasagar               | 88  | 0.547 | 0.069  | -0.175 | 0.314 | 0.069  | -0.174 | 0.311 |
| India | Assam-Sonitpur                | 93  | 0.572 | 0.082  | -0.157 | 0.322 | 0.081  | -0.153 | 0.315 |
| India | Assam-South Salmara Mancachar | 160 | 0.352 | 0.090  | -0.098 | 0.278 | 0.082  | -0.089 | 0.254 |
| India | Assam-Tinsukia                | 90  | 0.454 | -0.002 | -0.244 | 0.240 | -0.002 | -0.242 | 0.238 |
| India | Assam-Udalguri                | 90  | 0.371 | 0.148  | -0.100 | 0.396 | 0.138  | -0.093 | 0.370 |
| India | Assam-West Karbi Anglong      | 115 | 0.355 | -0.052 | -0.275 | 0.170 | -0.048 | -0.251 | 0.156 |
| India | Bihar-Araria                  | 267 | 0.451 | 0.009  | -0.130 | 0.149 | 0.009  | -0.129 | 0.148 |
| India | Bihar-Arwal                   | 196 | 0.771 | 0.155  | -0.037 | 0.347 | 0.109  | -0.026 | 0.245 |
| India | Bihar-Aurangabad              | 152 | 0.812 | -0.007 | -0.244 | 0.229 | -0.004 | -0.149 | 0.140 |
| India | Bihar-Banka                   | 166 | 0.788 | 0.123  | -0.093 | 0.339 | 0.082  | -0.062 | 0.226 |
| India | Bihar-Begusarai               | 177 | 0.519 | 0.097  | -0.073 | 0.268 | 0.097  | -0.073 | 0.267 |
| India | Bihar-Bhagalpur               | 171 | 0.627 | -0.049 | -0.229 | 0.131 | -0.046 | -0.214 | 0.122 |
| India | Bihar-Bhojpur                 | 188 | 0.500 | 0.065  | -0.100 | 0.231 | 0.065  | -0.100 | 0.231 |
| India | Bihar-Buxer                   | 172 | 0.761 | 0.227  | 0.026  | 0.427 | 0.165  | 0.019  | 0.311 |
| India | Bihar-Darbhanga               | 179 | 0.604 | 0.033  | -0.140 | 0.207 | 0.032  | -0.134 | 0.198 |
| India | Bihar-Gaya                    | 167 | 0.698 | -0.034 | -0.225 | 0.158 | -0.028 | -0.190 | 0.133 |
| India | Bihar-Gopalganj               | 165 | 0.719 | 0.189  | -0.006 | 0.384 | 0.153  | -0.005 | 0.311 |
| India | Bihar-Jamui                   | 187 | 0.576 | 0.210  | 0.044  | 0.376 | 0.205  | 0.043  | 0.367 |
| India | Bihar-Jehanabad               | 149 | 0.646 | 0.209  | 0.017  | 0.402 | 0.191  | 0.016  | 0.367 |
| India | Bihar-Kaimur (Bhabua)         | 169 | 0.895 | -0.187 | -0.471 | 0.097 | -0.071 | -0.178 | 0.036 |
| India | Bihar-Katihar                 | 192 | 0.511 | -0.044 | -0.208 | 0.120 | -0.044 | -0.208 | 0.120 |
| India | Bihar-Khagaria                | 244 | 0.568 | 0.195  | 0.050  | 0.340 | 0.191  | 0.049  | 0.333 |
| India | Bihar-Kishanganj              | 193 | 0.439 | -0.010 | -0.175 | 0.155 | -0.010 | -0.173 | 0.152 |
| India | Bihar-Lakhisarai              | 187 | 0.629 | 0.007  | -0.166 | 0.179 | 0.006  | -0.155 | 0.167 |
| India | Bihar-Madhepura               | 207 | 0.617 | -0.004 | -0.167 | 0.158 | -0.004 | -0.158 | 0.150 |
| India | Bihar-Madhubani               | 167 | 0.578 | -0.006 | -0.184 | 0.173 | -0.006 | -0.180 | 0.168 |
| India | Bihar-Munger                  | 173 | 0.655 | -0.073 | -0.255 | 0.109 | -0.066 | -0.230 | 0.098 |
| India | Bihar-Muzaffarpur             | 180 | 0.690 | -0.028 | -0.211 | 0.156 | -0.024 | -0.180 | 0.133 |
| India | Bihar-Nalanda                 | 160 | 0.607 | -0.038 | -0.222 | 0.146 | -0.036 | -0.212 | 0.139 |
| India | Bihar-Nawada                  | 183 | 0.684 | 0.051  | -0.130 | 0.232 | 0.044  | -0.112 | 0.200 |
| India | Bihar-Pashchim Champaran      | 157 | 0.591 | -0.141 | -0.325 | 0.042 | -0.137 | -0.314 | 0.041 |
| India | Bihar-Patna                   | 138 | 0.326 | -0.043 | -0.250 | 0.164 | -0.038 | -0.220 | 0.144 |
| India | Bihar-Purba Champaran         | 174 | 0.614 | 0.183  | 0.008  | 0.359 | 0.174  | 0.008  | 0.340 |
| India | Bihar-Purnia                  | 197 | 0.347 | 0.276  | 0.110  | 0.442 | 0.250  | 0.100  | 0.400 |
| India | Bihar-Rohtas                  | 145 | 0.862 | 0.317  | 0.047  | 0.586 | 0.150  | 0.022  | 0.278 |
| India | Bihar-Saharsa                 | 202 | 0.568 | -0.066 | -0.228 | 0.095 | -0.065 | -0.224 | 0.093 |
| India | Bihar-Samastipur              | 168 | 0.568 | 0.046  | -0.131 | 0.223 | 0.045  | -0.129 | 0.219 |
| India | Bihar-Saran                   | 180 | 0.441 | 0.088  | -0.082 | 0.259 | 0.087  | -0.081 | 0.255 |
| India | Bihar-Sheikhpura              | 159 | 0.729 | 0.002  | -0.201 | 0.205 | 0.001  | -0.159 | 0.162 |
| India | Bihar-Sheohar                 | 139 | 0.610 | 0.010  | -0.188 | 0.208 | 0.010  | -0.179 | 0.198 |
| India | Bihar-Sitamarhi               | 195 | 0.632 | 0.272  | 0.107  | 0.436 | 0.253  | 0.100  | 0.406 |
| India | Bihar-Siwan                   | 140 | 0.735 | 0.006  | -0.213 | 0.224 | 0.004  | -0.166 | 0.175 |
| India | Bihar-Supaul                  | 219 | 0.654 | -0.068 | -0.229 | 0.093 | -0.062 | -0.207 | 0.084 |
| India | Bihar-Vaishali                | 178 | 0.215 | 0.037  | -0.170 | 0.245 | 0.025  | -0.115 | 0.165 |
| India | Chandigarh-Chandigarh         | 54  | 0.723 | 0.160  | -0.188 | 0.507 | 0.128  | -0.151 | 0.407 |
| India | Chhattisgarh-Balod            | 78  | 0.750 | -0.203 | -0.499 | 0.093 | -0.152 | -0.374 | 0.070 |
| India | Chhattisgarh-Baloda Bazar     | 107 | 0.516 | 0.161  | -0.058 | 0.380 | 0.161  | -0.058 | 0.379 |
| India | Chhattisgarh-Balrampur        | 127 | 0.581 | 0.049  | -0.156 | 0.254 | 0.048  | -0.152 | 0.248 |
| India | Chhattisgarh-Bastar           | 116 | 0.394 | 0.411  | 0.208  | 0.615 | 0.393  | 0.199  | 0.587 |
| India | Chhattisgarh-Bemetara         | 116 | 0.684 | -0.099 | -0.326 | 0.129 | -0.085 | -0.282 | 0.111 |
| India | Chhattisgarh-Bijapur          | 131 | 0.734 | 0.296  | 0.077  | 0.516 | 0.232  | 0.060  | 0.403 |
| India | Chhattisgarh-Bilaspur         | 96  | 0.394 | 0.078  | -0.160 | 0.316 | 0.074  | -0.153 | 0.302 |
| India | Chhattisgarh-Dantewada        | 103 | 0.608 | 0.269  | 0.045  | 0.494 | 0.257  | 0.043  | 0.471 |
| India | Chhattisgarh-Dhamtari         | 83  | 0.798 | 0.067  | -0.246 | 0.380 | 0.043  | -0.158 | 0.245 |
| India | Chhattisgarh-Durg             | 99  | 0.584 | 0.007  | -0.226 | 0.240 | 0.007  | -0.220 | 0.233 |

|       |                                                                                                |     |       |        |        |        |        |        |        |
|-------|------------------------------------------------------------------------------------------------|-----|-------|--------|--------|--------|--------|--------|--------|
| India | Chhattisgarh-Gariyaband                                                                        | 100 | 0.726 | 0.125  | -0.130 | 0.380  | 0.099  | -0.104 | 0.302  |
| India | Chhattisgarh-Janjgir-Champa                                                                    | 92  | 0.710 | -0.076 | -0.339 | 0.186  | -0.063 | -0.279 | 0.153  |
| India | Chhattisgarh-Jashpur                                                                           | 121 | 0.755 | 0.285  | 0.049  | 0.521  | 0.211  | 0.036  | 0.385  |
| India | Chhattisgarh-Kabeerdham                                                                        | 96  | 0.735 | 0.178  | -0.084 | 0.440  | 0.139  | -0.065 | 0.343  |
| India | Chhattisgarh-Kodagaon                                                                          | 100 | 0.506 | 0.157  | -0.070 | 0.383  | 0.157  | -0.070 | 0.383  |
| India | Chhattisgarh-Korba                                                                             | 95  | 0.476 | 0.366  | 0.143  | 0.589  | 0.365  | 0.143  | 0.588  |
| India | Chhattisgarh-Koriya                                                                            | 106 | 0.715 | 0.065  | -0.181 | 0.310  | 0.053  | -0.147 | 0.253  |
| India | Chhattisgarh-Mahasamund                                                                        | 93  | 0.690 | 0.137  | -0.118 | 0.392  | 0.117  | -0.101 | 0.335  |
| India | Chhattisgarh-Mungeli                                                                           | 96  | 0.669 | 0.043  | -0.205 | 0.291  | 0.038  | -0.181 | 0.258  |
| India | Chhattisgarh-Narayanpur                                                                        | 108 | 0.763 | 0.106  | -0.152 | 0.363  | 0.076  | -0.110 | 0.263  |
| India | Chhattisgarh-Raigarh                                                                           | 85  | 0.676 | 0.010  | -0.256 | 0.275  | 0.009  | -0.224 | 0.241  |
| India | Chhattisgarh-Raipur                                                                            | 94  | 0.766 | -0.013 | -0.292 | 0.266  | -0.009 | -0.209 | 0.190  |
| India | Chhattisgarh-Rajnandgaon                                                                       | 104 | 0.784 | -0.369 | -0.631 | -0.106 | -0.250 | -0.428 | -0.072 |
| India | Chhattisgarh-Sukma                                                                             | 105 | 0.722 | -0.009 | -0.258 | 0.240  | -0.007 | -0.207 | 0.193  |
| India | Chhattisgarh-Surajpur                                                                          | 126 | 0.708 | -0.179 | -0.400 | 0.043  | -0.148 | -0.331 | 0.035  |
| India | Chhattisgarh-Surguja                                                                           | 127 | 0.709 | 0.016  | -0.207 | 0.238  | 0.013  | -0.171 | 0.197  |
| India | Chhattisgarh-Uttar Bastar Kanker<br>Dadra & Nagar Haveli & Daman & Diu-Dadra<br>& Nagar Haveli | 80  | 0.742 | -0.138 | -0.430 | 0.153  | -0.106 | -0.329 | 0.117  |
| India | Dadra & Nagar Haveli & Daman & Diu-<br>Dadra & Nagar Haveli & Daman & Diu-<br>Daman            | 121 | 0.899 | -0.283 | -0.624 | 0.057  | -0.103 | -0.226 | 0.021  |
| India | Dadra & Nagar Haveli & Daman & Diu-Diu                                                         | 68  | 0.618 | 0.265  | -0.015 | 0.544  | 0.250  | -0.014 | 0.514  |
| India | Dadra & Nagar Haveli & Daman & Diu-Diu                                                         | 85  | 0.825 | 0.294  | -0.027 | 0.615  | 0.170  | -0.015 | 0.355  |
| India | Goa-North Goa                                                                                  | 63  | 0.431 | 0.118  | -0.173 | 0.409  | 0.116  | -0.170 | 0.401  |
| India | Goa-South Goa                                                                                  | 50  | 0.381 | -0.132 | -0.466 | 0.202  | -0.124 | -0.440 | 0.191  |
| India | Gujarat-Ahmadabad                                                                              | 79  | 0.601 | -0.267 | -0.523 | -0.010 | -0.256 | -0.502 | -0.010 |
| India | Gujarat-Amreli                                                                                 | 74  | 0.531 | 0.078  | -0.189 | 0.344  | 0.078  | -0.188 | 0.343  |
| India | Gujarat-Anand                                                                                  | 89  | 0.583 | 0.162  | -0.082 | 0.405  | 0.157  | -0.080 | 0.394  |
| India | Gujarat-Aravali                                                                                | 121 | 0.551 | 0.090  | -0.118 | 0.298  | 0.089  | -0.116 | 0.295  |
| India | Gujarat-Banas Kantha                                                                           | 121 | 0.319 | 0.164  | -0.057 | 0.385  | 0.142  | -0.049 | 0.334  |
| India | Gujarat-Bharuch                                                                                | 98  | 0.477 | 0.132  | -0.098 | 0.362  | 0.132  | -0.097 | 0.361  |
| India | Gujarat-Bhavnagar                                                                              | 94  | 0.354 | -0.103 | -0.349 | 0.143  | -0.094 | -0.319 | 0.131  |
| India | Gujarat-Botad                                                                                  | 100 | 0.314 | 0.179  | -0.065 | 0.423  | 0.154  | -0.056 | 0.364  |
| India | Gujarat-Chhota Udaipur                                                                         | 98  | 0.769 | -0.177 | -0.449 | 0.095  | -0.126 | -0.319 | 0.067  |
| India | Gujarat-Devbhumi Dwarka                                                                        | 112 | 0.556 | -0.207 | -0.421 | 0.006  | -0.205 | -0.416 | 0.006  |
| India | Gujarat-Dohad                                                                                  | 158 | 0.510 | -0.213 | -0.391 | -0.035 | -0.213 | -0.391 | -0.035 |
| India | Gujarat-Gandhinagar                                                                            | 82  | 0.650 | 0.245  | -0.014 | 0.505  | 0.223  | -0.013 | 0.460  |
| India | Gujarat-Gir Somnath                                                                            | 106 | 0.334 | 0.052  | -0.183 | 0.287  | 0.046  | -0.163 | 0.255  |
| India | Gujarat-Jamnagar                                                                               | 76  | 0.777 | 0.222  | -0.090 | 0.534  | 0.154  | -0.062 | 0.370  |
| India | Gujarat-Junagadh                                                                               | 89  | 0.733 | -0.064 | -0.338 | 0.210  | -0.050 | -0.265 | 0.164  |
| India | Gujarat-Kachchh                                                                                | 112 | 0.605 | 0.117  | -0.102 | 0.337  | 0.112  | -0.098 | 0.322  |
| India | Gujarat-Kheda                                                                                  | 101 | 0.509 | 0.273  | 0.052  | 0.494  | 0.273  | 0.052  | 0.494  |
| India | Gujarat-Mahesana                                                                               | 76  | 0.471 | -0.085 | -0.348 | 0.177  | -0.085 | -0.347 | 0.177  |
| India | Gujarat-Mahisagar                                                                              | 107 | 0.743 | -0.090 | -0.342 | 0.162  | -0.069 | -0.262 | 0.123  |
| India | Gujarat-Morbi                                                                                  | 111 | 0.637 | 0.094  | -0.130 | 0.319  | 0.087  | -0.120 | 0.295  |
| India | Gujarat-Narmada                                                                                | 107 | 0.746 | 0.306  | 0.060  | 0.553  | 0.232  | 0.045  | 0.419  |
| India | Gujarat-Navsari                                                                                | 73  | 0.874 | -0.128 | -0.531 | 0.275  | -0.057 | -0.235 | 0.121  |
| India | Gujarat-Panch Mahals                                                                           | 122 | 0.846 | 0.206  | -0.078 | 0.490  | 0.107  | -0.040 | 0.255  |
| India | Gujarat-Patan                                                                                  | 110 | 0.707 | 0.142  | -0.096 | 0.379  | 0.117  | -0.080 | 0.314  |
| India | Gujarat-Porbandar                                                                              | 76  | 0.781 | -0.239 | -0.552 | 0.074  | -0.164 | -0.378 | 0.051  |
| India | Gujarat-Rajkot                                                                                 | 81  | 0.465 | 0.266  | 0.018  | 0.515  | 0.265  | 0.018  | 0.512  |
| India | Gujarat-Sabar Kantha                                                                           | 101 | 0.790 | -0.030 | -0.309 | 0.249  | -0.020 | -0.205 | 0.165  |
| India | Gujarat-Surat                                                                                  | 93  | 0.827 | -0.106 | -0.419 | 0.207  | -0.061 | -0.240 | 0.118  |
| India | Gujarat-Surendranagar                                                                          | 100 | 0.584 | 0.122  | -0.109 | 0.352  | 0.118  | -0.106 | 0.342  |
| India | Gujarat-Tapi                                                                                   | 64  | 0.841 | 0.239  | -0.149 | 0.627  | 0.128  | -0.080 | 0.336  |
| India | Gujarat-The Dangs                                                                              | 106 | 0.866 | 0.252  | -0.071 | 0.574  | 0.117  | -0.033 | 0.266  |
| India | Gujarat-Vadodara                                                                               | 79  | 0.513 | 0.145  | -0.110 | 0.401  | 0.145  | -0.110 | 0.401  |
| India | Gujarat-Valsad                                                                                 | 109 | 0.830 | -0.154 | -0.444 | 0.136  | -0.087 | -0.250 | 0.077  |
| India | Haryana-Ambala                                                                                 | 91  | 0.525 | -0.018 | -0.258 | 0.222  | -0.018 | -0.257 | 0.222  |
| India | Haryana-Bhiwani                                                                                | 118 | 0.542 | 0.004  | -0.207 | 0.215  | 0.004  | -0.205 | 0.214  |
| India | Haryana-Charhki Dadri                                                                          | 91  | 0.644 | 0.011  | -0.239 | 0.262  | 0.010  | -0.219 | 0.240  |
| India | Haryana-Faridabad                                                                              | 96  | 0.557 | 0.131  | -0.102 | 0.365  | 0.130  | -0.101 | 0.360  |
| India | Haryana-Fatehabad                                                                              | 109 | 0.757 | 0.004  | -0.251 | 0.259  | 0.003  | -0.185 | 0.191  |
| India | Haryana-Gurgaon                                                                                | 77  | 0.487 | 0.199  | -0.058 | 0.457  | 0.199  | -0.058 | 0.457  |

|       |                                |     |       |        |        |       |        |        |       |
|-------|--------------------------------|-----|-------|--------|--------|-------|--------|--------|-------|
| India | Haryana-Hisar                  | 113 | 0.655 | -0.069 | -0.295 | 0.156 | -0.062 | -0.266 | 0.141 |
| India | Haryana-Jhajjar                | 86  | 0.681 | 0.180  | -0.082 | 0.442 | 0.156  | -0.071 | 0.384 |
| India | Haryana-Jind                   | 96  | 0.691 | 0.044  | -0.208 | 0.297 | 0.038  | -0.178 | 0.254 |
| India | Haryana-Kaithal                | 88  | 0.737 | -0.030 | -0.307 | 0.247 | -0.023 | -0.238 | 0.192 |
| India | Haryana-Karnal                 | 124 | 0.820 | 0.049  | -0.218 | 0.315 | 0.029  | -0.129 | 0.186 |
| India | Haryana-Kurukshetra            | 121 | 0.661 | -0.042 | -0.261 | 0.177 | -0.038 | -0.234 | 0.159 |
| India | Haryana-Mahendragarh           | 87  | 0.540 | 0.146  | -0.099 | 0.390 | 0.145  | -0.098 | 0.387 |
| India | Haryana-Mewat                  | 218 | 0.391 | 0.136  | -0.020 | 0.293 | 0.130  | -0.019 | 0.279 |
| India | Haryana-Palwal                 | 161 | 0.487 | 0.147  | -0.031 | 0.326 | 0.147  | -0.031 | 0.325 |
| India | Haryana-Panchkula              | 54  | 0.775 | -0.086 | -0.461 | 0.289 | -0.060 | -0.321 | 0.202 |
| India | Haryana-Panipat                | 108 | 0.621 | 0.152  | -0.073 | 0.377 | 0.143  | -0.069 | 0.354 |
| India | Haryana-Rewari                 | 87  | 0.618 | 0.058  | -0.194 | 0.311 | 0.055  | -0.183 | 0.293 |
| India | Haryana-Rohtak                 | 97  | 0.612 | -0.022 | -0.260 | 0.217 | -0.021 | -0.247 | 0.206 |
| India | Haryana-Sirsa                  | 40  | 0.740 | 0.086  | -0.332 | 0.503 | 0.066  | -0.255 | 0.387 |
| India | Haryana-Sonipat                | 97  | 0.577 | 0.172  | -0.060 | 0.405 | 0.168  | -0.059 | 0.395 |
| India | Haryana-Yamunanagar            | 130 | 0.585 | -0.021 | -0.224 | 0.182 | -0.020 | -0.218 | 0.177 |
| India | Himachal Pradesh-Bilaspur      | 69  | 0.811 | 0.139  | -0.212 | 0.491 | 0.085  | -0.130 | 0.301 |
| India | Himachal Pradesh-Chamba        | 80  | 0.757 | 0.214  | -0.082 | 0.509 | 0.157  | -0.060 | 0.374 |
| India | Himachal Pradesh-Hamirpur      | 51  | 0.580 | 0.166  | -0.158 | 0.490 | 0.162  | -0.154 | 0.478 |
| India | Himachal Pradesh-Kangra        | 68  | 0.503 | -0.034 | -0.313 | 0.244 | -0.034 | -0.313 | 0.244 |
| India | Himachal Pradesh-Kinnaur       | 52  | 0.602 | 0.068  | -0.258 | 0.395 | 0.066  | -0.247 | 0.378 |
| India | Himachal Pradesh-Kullu         | 64  | 0.559 | 0.124  | -0.163 | 0.412 | 0.123  | -0.161 | 0.406 |
| India | Himachal Pradesh-Lahul & Spiti | 73  | 0.545 | 0.202  | -0.063 | 0.468 | 0.201  | -0.063 | 0.464 |
| India | Himachal Pradesh-Mandi         | 75  | 0.952 | 0.046  | -0.576 | 0.668 | 0.008  | -0.104 | 0.121 |
| India | Himachal Pradesh-Shimla        | 65  | 0.734 | 0.019  | -0.303 | 0.342 | 0.015  | -0.237 | 0.267 |
| India | Himachal Pradesh-Sirmaur       | 98  | 0.782 | -0.048 | -0.327 | 0.232 | -0.032 | -0.223 | 0.158 |
| India | Himachal Pradesh-Solan         | 71  | 0.856 | 0.353  | -0.026 | 0.731 | 0.174  | -0.013 | 0.361 |
| India | Himachal Pradesh-Una           | 84  | 0.566 | 0.273  | 0.028  | 0.518 | 0.269  | 0.028  | 0.509 |
| India | Jammu & Kashmir-Anantnag       | 74  | 0.665 | 0.057  | -0.225 | 0.339 | 0.051  | -0.201 | 0.302 |
| India | Jammu & Kashmir-Badgam         | 98  | 0.805 | -0.193 | -0.482 | 0.096 | -0.121 | -0.303 | 0.060 |
| India | Jammu & Kashmir-Bandipore      | 88  | 0.699 | 0.122  | -0.143 | 0.387 | 0.102  | -0.120 | 0.325 |
| India | Jammu & Kashmir-Baramula       | 113 | 0.607 | -0.067 | -0.286 | 0.153 | -0.064 | -0.273 | 0.146 |
| India | Jammu & Kashmir-Doda           | 104 | 0.648 | 0.167  | -0.066 | 0.399 | 0.152  | -0.060 | 0.364 |
| India | Jammu & Kashmir-Ganderbal      | 126 | 0.695 | -0.014 | -0.234 | 0.207 | -0.012 | -0.199 | 0.176 |
| India | Jammu & Kashmir-Jammu          | 82  | 0.721 | 0.272  | -0.004 | 0.548 | 0.219  | -0.003 | 0.441 |
| India | Jammu & Kashmir-Kathua         | 58  | 0.704 | -0.296 | -0.618 | 0.026 | -0.246 | -0.515 | 0.022 |
| India | Jammu & Kashmir-Kishtwar       | 75  | 0.708 | 0.323  | 0.041  | 0.605 | 0.267  | 0.034  | 0.500 |
| India | Jammu & Kashmir-Kulgam         | 106 | 0.876 | 0.330  | -0.001 | 0.661 | 0.143  | 0.000  | 0.287 |
| India | Jammu & Kashmir-Kupwara        | 102 | 0.872 | 0.160  | -0.177 | 0.497 | 0.071  | -0.079 | 0.222 |
| India | Jammu & Kashmir-Pulwama        | 80  | 0.891 | 0.212  | -0.197 | 0.622 | 0.082  | -0.076 | 0.241 |
| India | Jammu & Kashmir-Punch          | 112 | 0.789 | -0.133 | -0.397 | 0.130 | -0.089 | -0.264 | 0.087 |
| India | Jammu & Kashmir-Rajouri        | 113 | 0.861 | 0.033  | -0.278 | 0.343 | 0.016  | -0.133 | 0.164 |
| India | Jammu & Kashmir-Ramban         | 123 | 0.630 | 0.154  | -0.057 | 0.365 | 0.144  | -0.053 | 0.341 |
| India | Jammu & Kashmir-Reasi          | 110 | 0.730 | 0.867  | 0.684  | 1.050 | 0.683  | 0.539  | 0.827 |
| India | Jammu & Kashmir-Samba          | 100 | 0.805 | 0.091  | -0.197 | 0.379 | 0.057  | -0.124 | 0.238 |
| India | Jammu & Kashmir-Shupiyan       | 90  | 0.905 | 0.315  | -0.092 | 0.722 | 0.108  | -0.031 | 0.247 |
| India | Jammu & Kashmir-Srinagar       | 60  | 0.864 | 0.175  | -0.256 | 0.606 | 0.082  | -0.120 | 0.285 |
| India | Jammu & Kashmir-Udhampur       | 104 | 0.746 | -0.003 | -0.261 | 0.254 | -0.002 | -0.197 | 0.193 |
| India | Jharkhand-Bokaro               | 110 | 0.692 | -0.019 | -0.255 | 0.216 | -0.017 | -0.218 | 0.185 |
| India | Jharkhand-Chatra               | 162 | 0.673 | 0.157  | -0.032 | 0.346 | 0.138  | -0.028 | 0.305 |
| India | Jharkhand-Deoghar              | 156 | 0.466 | -0.024 | -0.207 | 0.159 | -0.024 | -0.206 | 0.158 |
| India | Jharkhand-Dhanbad              | 116 | 0.691 | 0.084  | -0.145 | 0.313 | 0.072  | -0.124 | 0.267 |
| India | Jharkhand-Dumka                | 127 | 0.738 | 0.048  | -0.182 | 0.278 | 0.037  | -0.141 | 0.215 |
| India | Jharkhand-Garhwa               | 154 | 0.669 | 0.165  | -0.028 | 0.359 | 0.146  | -0.025 | 0.318 |
| India | Jharkhand-Giridih              | 157 | 0.540 | 0.217  | 0.038  | 0.397 | 0.216  | 0.038  | 0.394 |
| India | Jharkhand-Godda                | 128 | 0.379 | 0.175  | -0.030 | 0.381 | 0.165  | -0.028 | 0.359 |
| India | Jharkhand-Gumla                | 134 | 0.729 | -0.090 | -0.311 | 0.131 | -0.071 | -0.246 | 0.103 |
| India | Jharkhand-Hazaribagh           | 171 | 0.614 | 0.094  | -0.085 | 0.272 | 0.089  | -0.080 | 0.258 |
| India | Jharkhand-Jamtara              | 111 | 0.688 | -0.080 | -0.313 | 0.154 | -0.069 | -0.269 | 0.132 |
| India | Jharkhand-Khunti               | 106 | 0.579 | 0.262  | 0.043  | 0.481 | 0.256  | 0.042  | 0.469 |
| India | Jharkhand-Kodarma              | 176 | 0.593 | -0.023 | -0.197 | 0.152 | -0.022 | -0.191 | 0.147 |
| India | Jharkhand-Latehar              | 155 | 0.703 | 0.107  | -0.093 | 0.307 | 0.089  | -0.077 | 0.256 |
| India | Jharkhand-Lohardaga            | 110 | 0.843 | 0.442  | 0.155  | 0.730 | 0.234  | 0.082  | 0.386 |



|       |                               |     |       |        |        |       |        |        |       |
|-------|-------------------------------|-----|-------|--------|--------|-------|--------|--------|-------|
| India | Jharkhand-Pakur               | 155 | 0.626 | 0.109  | -0.079 | 0.297 | 0.102  | -0.074 | 0.279 |
| India | Jharkhand-Palamu              | 163 | 0.712 | 0.153  | -0.042 | 0.349 | 0.126  | -0.035 | 0.286 |
| India | Jharkhand-Pashchimi Singhbhum | 157 | 0.722 | 0.092  | -0.111 | 0.294 | 0.074  | -0.089 | 0.236 |
| India | Jharkhand-Purbi Singhbhum     | 104 | 0.795 | 0.022  | -0.255 | 0.300 | 0.015  | -0.166 | 0.195 |
| India | Jharkhand-Ramgarh             | 120 | 0.740 | 0.024  | -0.213 | 0.261 | 0.019  | -0.164 | 0.201 |
| India | Jharkhand-Ranchi              | 103 | 0.659 | -0.232 | -0.465 | 0.002 | -0.208 | -0.418 | 0.001 |
| India | Jharkhand-Sahibganj           | 186 | 0.608 | -0.048 | -0.218 | 0.123 | -0.045 | -0.208 | 0.117 |
| India | Jharkhand-Saraikela-Kharsawan | 101 | 0.789 | -0.143 | -0.420 | 0.134 | -0.095 | -0.280 | 0.090 |
| India | Jharkhand-Simdega             | 123 | 0.655 | 0.244  | 0.032  | 0.456 | 0.221  | 0.029  | 0.412 |
| India | Karnataka-Bagalkot            | 108 | 0.608 | 0.063  | -0.161 | 0.288 | 0.060  | -0.154 | 0.275 |
| India | Karnataka-Bangalore           | 61  | 0.513 | 0.044  | -0.251 | 0.338 | 0.044  | -0.250 | 0.338 |
| India | Karnataka-Bangalore Rural     | 91  | 0.841 | -0.075 | -0.403 | 0.252 | -0.040 | -0.215 | 0.135 |
| India | Karnataka-Belgaum             | 118 | 0.636 | 0.048  | -0.170 | 0.266 | 0.045  | -0.157 | 0.247 |
| India | Karnataka-Bellary             | 86  | 0.571 | 0.146  | -0.102 | 0.393 | 0.143  | -0.100 | 0.385 |
| India | Karnataka-Bidar               | 117 | 0.502 | -0.054 | -0.265 | 0.157 | -0.054 | -0.265 | 0.157 |
| India | Karnataka-Bijapur             | 118 | 0.577 | 0.000  | -0.213 | 0.213 | 0.000  | -0.208 | 0.208 |
| India | Karnataka-Chamarajanagar      | 69  | 0.827 | -0.044 | -0.410 | 0.321 | -0.025 | -0.234 | 0.184 |
| India | Karnataka-Chikkaballapura     | 61  | 0.750 | 0.225  | -0.111 | 0.560 | 0.169  | -0.083 | 0.420 |
| India | Karnataka-Chikmagalur         | 75  | 0.723 | -0.010 | -0.306 | 0.286 | -0.008 | -0.245 | 0.229 |
| India | Karnataka-Chitradurga         | 78  | 0.852 | 0.418  | 0.064  | 0.771 | 0.211  | 0.032  | 0.389 |
| India | Karnataka-Dakshina Kannada    | 71  | 0.817 | -0.186 | -0.536 | 0.164 | -0.111 | -0.320 | 0.098 |
| India | Karnataka-Davanagere          | 88  | 0.610 | 0.017  | -0.233 | 0.267 | 0.017  | -0.222 | 0.255 |
| India | Karnataka-Dharwad             | 86  | 0.743 | -0.061 | -0.344 | 0.221 | -0.047 | -0.262 | 0.169 |
| India | Karnataka-Gadag               | 107 | 0.669 | -0.078 | -0.312 | 0.156 | -0.069 | -0.277 | 0.138 |
| India | Karnataka-Gulbarga            | 128 | 0.486 | 0.128  | -0.073 | 0.328 | 0.128  | -0.073 | 0.328 |
| India | Karnataka-Hassan              | 66  | 0.762 | -0.147 | -0.477 | 0.184 | -0.106 | -0.346 | 0.133 |
| India | Karnataka-Haveri              | 112 | 0.749 | 0.186  | -0.061 | 0.432 | 0.140  | -0.046 | 0.325 |
| India | Karnataka-Kodagu              | 71  | 0.721 | 0.098  | -0.204 | 0.401 | 0.079  | -0.164 | 0.323 |
| India | Karnataka-Kolar               | 89  | 0.835 | -0.024 | -0.351 | 0.303 | -0.013 | -0.193 | 0.167 |
| India | Karnataka-Koppal              | 118 | 0.511 | -0.050 | -0.260 | 0.160 | -0.050 | -0.260 | 0.160 |
| India | Karnataka-Mandya              | 56  | 0.899 | 0.103  | -0.408 | 0.613 | 0.037  | -0.148 | 0.223 |
| India | Karnataka-Mysore              | 69  | 0.832 | 0.009  | -0.362 | 0.379 | 0.005  | -0.202 | 0.211 |
| India | Karnataka-Raichur             | 138 | 0.641 | 0.099  | -0.103 | 0.300 | 0.091  | -0.095 | 0.276 |
| India | Karnataka-Ramanagara          | 49  | 0.851 | 0.010  | -0.453 | 0.474 | 0.005  | -0.230 | 0.240 |
| India | Karnataka-Shimoga             | 85  | 0.756 | -0.087 | -0.375 | 0.202 | -0.064 | -0.277 | 0.149 |
| India | Karnataka-Tumkur              | 70  | 0.889 | 0.535  | 0.117  | 0.954 | 0.210  | 0.046  | 0.375 |
| India | Karnataka-Udupi               | 88  | 0.815 | 0.104  | -0.210 | 0.417 | 0.063  | -0.127 | 0.252 |
| India | Karnataka-Uttara Kannada      | 89  | 0.838 | 0.044  | -0.285 | 0.373 | 0.024  | -0.155 | 0.203 |
| India | Karnataka-Yadgir              | 163 | 0.635 | 0.159  | -0.025 | 0.343 | 0.147  | -0.023 | 0.318 |
| India | Kerala-Alappuzha              | 45  | 0.449 | 0.109  | -0.236 | 0.454 | 0.108  | -0.234 | 0.450 |
| India | Kerala-Ernakulam              | 55  | 0.399 | 0.018  | -0.299 | 0.336 | 0.018  | -0.287 | 0.322 |
| India | Kerala-Idukki                 | 48  | 0.371 | 0.083  | -0.261 | 0.428 | 0.078  | -0.244 | 0.399 |
| India | Kerala-Kannur                 | 94  | 0.311 | -0.221 | -0.472 | 0.029 | -0.190 | -0.405 | 0.025 |
| India | Kerala-Kasaragod              | 88  | 0.519 | 0.106  | -0.137 | 0.349 | 0.106  | -0.137 | 0.349 |
| India | Kerala-Kollam                 | 50  | 0.459 | -0.013 | -0.341 | 0.315 | -0.013 | -0.338 | 0.313 |
| India | Kerala-Kottayam               | 45  | 0.468 | -0.171 | -0.513 | 0.171 | -0.170 | -0.511 | 0.170 |
| India | Kerala-Kozhikode              | 73  | 0.294 | 0.212  | -0.079 | 0.502 | 0.176  | -0.065 | 0.417 |
| India | Kerala-Malappuram             | 100 | 0.449 | 0.006  | -0.223 | 0.236 | 0.006  | -0.221 | 0.234 |
| India | Kerala-Palakkad               | 75  | 0.398 | 0.041  | -0.230 | 0.311 | 0.039  | -0.220 | 0.298 |
| India | Kerala-Pathanamthitta         | 33  | 0.408 | -0.124 | -0.535 | 0.287 | -0.120 | -0.517 | 0.277 |
| India | Kerala-Thiruvananthapuram     | 60  | 0.389 | 0.006  | -0.299 | 0.310 | 0.005  | -0.284 | 0.295 |
| India | Kerala-Thrissur               | 44  | 0.293 | -0.284 | -0.658 | 0.090 | -0.235 | -0.545 | 0.075 |
| India | Kerala-Wayanad                | 72  | 0.581 | -0.233 | -0.502 | 0.035 | -0.227 | -0.489 | 0.034 |
| India | Ladakh-Kargil                 | 77  | 0.855 | -0.155 | -0.524 | 0.214 | -0.077 | -0.260 | 0.106 |
| India | Ladakh-Leh                    | 83  | 0.694 | 0.014  | -0.259 | 0.287 | 0.012  | -0.220 | 0.243 |
| India | Lakshadweep-Lakshadweep       | 83  | 0.348 | 0.221  | -0.038 | 0.481 | 0.201  | -0.035 | 0.436 |
| India | Madhya Pradesh-Agar Malwa     | 45  | 0.721 | 0.180  | -0.201 | 0.561 | 0.145  | -0.161 | 0.451 |
| India | Madhya Pradesh-Alirajpur      | 148 | 0.696 | 0.014  | -0.190 | 0.217 | 0.012  | -0.161 | 0.184 |
| India | Madhya Pradesh-Anuppur        | 100 | 0.756 | 0.089  | -0.176 | 0.354 | 0.066  | -0.130 | 0.262 |
| India | Madhya Pradesh-Ashoknagar     | 98  | 0.664 | 0.074  | -0.170 | 0.318 | 0.066  | -0.152 | 0.284 |
| India | Madhya Pradesh-Balaghat       | 79  | 0.662 | 0.500  | 0.251  | 0.748 | 0.447  | 0.225  | 0.670 |
| India | Madhya Pradesh-Barwani        | 177 | 0.656 | 0.099  | -0.081 | 0.278 | 0.089  | -0.073 | 0.251 |
| India | Madhya Pradesh-Betul          | 122 | 0.743 | 0.083  | -0.153 | 0.319 | 0.063  | -0.117 | 0.243 |

|       |                                      |     |       |        |        |       |        |        |       |
|-------|--------------------------------------|-----|-------|--------|--------|-------|--------|--------|-------|
| India | Madhya Pradesh-Bhind                 | 121 | 0.630 | -0.063 | -0.277 | 0.152 | -0.058 | -0.258 | 0.142 |
| India | Madhya Pradesh-Bhopal                | 36  | 0.529 | -0.036 | -0.424 | 0.352 | -0.035 | -0.422 | 0.351 |
| India | Madhya Pradesh-Burhanpur             | 131 | 0.797 | 0.239  | -0.005 | 0.484 | 0.155  | -0.003 | 0.313 |
| India | Madhya Pradesh-Chhatarpur            | 125 | 0.630 | 0.270  | 0.064  | 0.476 | 0.251  | 0.060  | 0.443 |
| India | Madhya Pradesh-Chhindwara            | 86  | 0.656 | 0.414  | 0.169  | 0.658 | 0.374  | 0.153  | 0.594 |
| India | Madhya Pradesh-Damoh                 | 108 | 0.604 | -0.097 | -0.321 | 0.126 | -0.093 | -0.308 | 0.121 |
| India | Madhya Pradesh-Datia                 | 100 | 0.682 | 0.137  | -0.107 | 0.381 | 0.119  | -0.093 | 0.330 |
| India | Madhya Pradesh-Dewas                 | 102 | 0.706 | 0.160  | -0.086 | 0.407 | 0.133  | -0.071 | 0.338 |
| India | Madhya Pradesh-Dhar                  | 72  | 0.679 | 0.050  | -0.240 | 0.339 | 0.043  | -0.209 | 0.295 |
| India | Madhya Pradesh-Dindori               | 115 | 0.654 | 0.225  | 0.005  | 0.445 | 0.203  | 0.004  | 0.403 |
| India | Madhya Pradesh-Guna                  | 147 | 0.784 | 0.007  | -0.221 | 0.235 | 0.005  | -0.150 | 0.159 |
| India | Madhya Pradesh-Gwalior               | 114 | 0.688 | 0.217  | -0.010 | 0.445 | 0.187  | -0.008 | 0.382 |
| India | Madhya Pradesh-Harda                 | 113 | 0.908 | -0.117 | -0.488 | 0.254 | -0.039 | -0.163 | 0.085 |
| India | Madhya Pradesh-Hoshangabad           | 113 | 0.633 | 0.042  | -0.181 | 0.264 | 0.039  | -0.168 | 0.246 |
| India | Madhya Pradesh-Indore                | 106 | 0.742 | -0.163 | -0.415 | 0.088 | -0.125 | -0.318 | 0.067 |
| India | Madhya Pradesh-Jabalpur              | 15  | 0.873 | 0.095  | -0.844 | 1.035 | 0.042  | -0.374 | 0.458 |
| India | Madhya Pradesh-Jhabua                | 157 | 0.884 | 0.119  | -0.164 | 0.401 | 0.049  | -0.068 | 0.165 |
| India | Madhya Pradesh-Katni                 | 70  | 0.828 | -0.162 | -0.524 | 0.200 | -0.092 | -0.298 | 0.114 |
| India | Madhya Pradesh-Khandwa (East Nimar)  | 57  | 0.863 | 0.149  | -0.293 | 0.591 | 0.070  | -0.139 | 0.279 |
| India | Madhya Pradesh-Khargone (West Nimar) | 105 | 0.672 | 0.355  | 0.128  | 0.583 | 0.314  | 0.113  | 0.514 |
| India | Madhya Pradesh-Mandla                | 112 | 0.855 | 0.170  | -0.135 | 0.474 | 0.084  | -0.067 | 0.235 |
| India | Madhya Pradesh-Mandsaur              | 91  | 0.660 | 0.087  | -0.165 | 0.340 | 0.078  | -0.148 | 0.305 |
| India | Madhya Pradesh-Morena                | 162 | 0.687 | 0.033  | -0.160 | 0.226 | 0.028  | -0.138 | 0.194 |
| India | Madhya Pradesh-Narsimhapur           | 127 | 0.742 | 0.368  | 0.146  | 0.590 | 0.282  | 0.112  | 0.452 |
| India | Madhya Pradesh-Neemuch               | 125 | 0.853 | -0.009 | -0.297 | 0.280 | -0.004 | -0.149 | 0.140 |
| India | Madhya Pradesh-Panna                 | 112 | 0.555 | 0.351  | 0.144  | 0.558 | 0.346  | 0.142  | 0.551 |
| India | Madhya Pradesh-Raisen                | 38  | 0.714 | 0.774  | 0.443  | 1.106 | 0.632  | 0.361  | 0.903 |
| India | Madhya Pradesh-Rajgarh               | 98  | 0.571 | 0.349  | 0.126  | 0.572 | 0.342  | 0.124  | 0.560 |
| India | Madhya Pradesh-Ratlam                | 136 | 0.854 | 0.497  | 0.233  | 0.761 | 0.248  | 0.116  | 0.380 |
| India | Madhya Pradesh-Rewa                  | 119 | 0.595 | -0.089 | -0.302 | 0.123 | -0.086 | -0.291 | 0.119 |
| India | Madhya Pradesh-Sagar                 | 127 | 0.625 | 0.176  | -0.031 | 0.383 | 0.165  | -0.029 | 0.359 |
| India | Madhya Pradesh-Satna                 | 79  | 0.601 | 0.240  | -0.018 | 0.498 | 0.230  | -0.017 | 0.478 |
| India | Madhya Pradesh-Sehore                | 102 | 0.541 | 0.089  | -0.137 | 0.316 | 0.089  | -0.136 | 0.313 |
| India | Madhya Pradesh-Seoni                 | 114 | 0.812 | -0.154 | -0.426 | 0.118 | -0.094 | -0.260 | 0.072 |
| India | Madhya Pradesh-Shahdol               | 100 | 0.800 | -0.011 | -0.297 | 0.274 | -0.007 | -0.190 | 0.176 |
| India | Madhya Pradesh-Shajapur              | 132 | 0.732 | 0.020  | -0.204 | 0.244 | 0.016  | -0.160 | 0.192 |
| India | Madhya Pradesh-Sheopur               | 151 | 0.626 | 0.283  | 0.097  | 0.469 | 0.265  | 0.091  | 0.439 |
| India | Madhya Pradesh-Shivpuri              | 115 | 0.581 | 0.019  | -0.197 | 0.234 | 0.018  | -0.192 | 0.228 |
| India | Madhya Pradesh-Sidhi                 | 124 | 0.735 | -0.044 | -0.276 | 0.188 | -0.035 | -0.215 | 0.146 |
| India | Madhya Pradesh-Singrauli             | 69  | 0.522 | -0.217 | -0.489 | 0.055 | -0.217 | -0.488 | 0.055 |
| India | Madhya Pradesh-Tikamgarh             | 59  | 0.699 | -0.143 | -0.467 | 0.182 | -0.120 | -0.393 | 0.153 |
| India | Madhya Pradesh-Ujjain                | 117 | 0.787 | 0.057  | -0.201 | 0.315 | 0.038  | -0.134 | 0.211 |
| India | Madhya Pradesh-Umaria                | 98  | 0.581 | 0.142  | -0.090 | 0.374 | 0.138  | -0.088 | 0.364 |
| India | Madhya Pradesh-Vidisha               | 122 | 0.735 | 0.174  | -0.058 | 0.406 | 0.136  | -0.045 | 0.316 |
| India | Maharashtra-Ahmadnagar               | 108 | 0.701 | 0.376  | 0.147  | 0.605 | 0.315  | 0.123  | 0.507 |
| India | Maharashtra-Akola                    | 127 | 0.691 | 0.052  | -0.167 | 0.271 | 0.044  | -0.143 | 0.231 |
| India | Maharashtra-Amravati                 | 73  | 0.827 | -0.142 | -0.495 | 0.211 | -0.081 | -0.284 | 0.121 |
| India | Maharashtra-Aurangabad               | 112 | 0.449 | -0.079 | -0.295 | 0.138 | -0.078 | -0.292 | 0.136 |
| India | Maharashtra-Bhandara                 | 74  | 0.859 | 0.092  | -0.290 | 0.474 | 0.045  | -0.141 | 0.230 |
| India | Maharashtra-Bid                      | 102 | 0.700 | 0.250  | 0.008  | 0.492 | 0.210  | 0.007  | 0.413 |
| India | Maharashtra-Buldana                  | 89  | 0.773 | 0.177  | -0.110 | 0.464 | 0.124  | -0.077 | 0.326 |
| India | Maharashtra-Chandrapur               | 63  | 0.898 | -0.239 | -0.714 | 0.235 | -0.088 | -0.262 | 0.086 |
| India | Maharashtra-Dhule                    | 108 | 0.386 | 0.132  | -0.093 | 0.356 | 0.125  | -0.088 | 0.338 |
| India | Maharashtra-Gadchiroli               | 82  | 0.945 | 0.456  | -0.091 | 1.004 | 0.094  | -0.019 | 0.207 |
| India | Maharashtra-Gondiya                  | 83  | 0.819 | -0.284 | -0.605 | 0.036 | -0.169 | -0.359 | 0.021 |
| India | Maharashtra-Hingoli                  | 108 | 0.643 | 0.108  | -0.120 | 0.337 | 0.099  | -0.110 | 0.309 |
| India | Maharashtra-Jalgaon                  | 104 | 0.285 | 0.316  | 0.076  | 0.557 | 0.258  | 0.062  | 0.454 |
| India | Maharashtra-Jalna                    | 96  | 0.493 | 0.012  | -0.221 | 0.246 | 0.012  | -0.221 | 0.246 |
| India | Maharashtra-Kolhapur                 | 82  | 0.371 | 0.124  | -0.136 | 0.385 | 0.116  | -0.127 | 0.359 |
| India | Maharashtra-Latur                    | 98  | 0.727 | 0.244  | -0.010 | 0.499 | 0.194  | -0.008 | 0.396 |
| India | Maharashtra-Mumbai                   | 41  | 0.632 | 0.015  | -0.360 | 0.391 | 0.014  | -0.335 | 0.364 |
| India | Maharashtra-Mumbai Suburban          | 40  | 0.313 | -0.306 | -0.690 | 0.078 | -0.263 | -0.593 | 0.067 |
| India | Maharashtra-Nagpur                   | 85  | 0.770 | -0.183 | -0.475 | 0.110 | -0.129 | -0.337 | 0.078 |

|       |                                  |     |       |        |        |        |        |        |        |
|-------|----------------------------------|-----|-------|--------|--------|--------|--------|--------|--------|
| India | Maharashtra-Nanded               | 106 | 0.536 | 0.090  | -0.132 | 0.312  | 0.089  | -0.131 | 0.310  |
| India | Maharashtra-Nandurbar            | 119 | 0.289 | 0.118  | -0.112 | 0.348  | 0.097  | -0.092 | 0.286  |
| India | Maharashtra-Nashik               | 117 | 0.591 | 0.348  | 0.143  | 0.553  | 0.337  | 0.138  | 0.535  |
| India | Maharashtra-Osmanabad            | 105 | 0.791 | 0.009  | -0.265 | 0.284  | 0.006  | -0.175 | 0.188  |
| India | Maharashtra-Palghar              | 66  | 0.806 | -0.384 | -0.729 | -0.039 | -0.240 | -0.456 | -0.024 |
| India | Maharashtra-Parbhani             | 139 | 0.315 | 0.197  | -0.008 | 0.403  | 0.170  | -0.007 | 0.347  |
| India | Maharashtra-Pune                 | 75  | 0.352 | 0.090  | -0.187 | 0.366  | 0.082  | -0.170 | 0.334  |
| India | Maharashtra-Raigarh              | 66  | 0.829 | -0.001 | -0.376 | 0.374  | -0.001 | -0.214 | 0.213  |
| India | Maharashtra-Ratnagiri            | 62  | 0.502 | -0.173 | -0.462 | 0.115  | -0.173 | -0.462 | 0.115  |
| India | Maharashtra-Sangli               | 85  | 0.444 | 0.274  | 0.031  | 0.517  | 0.270  | 0.030  | 0.510  |
| India | Maharashtra-Satara               | 77  | 0.834 | 0.043  | -0.308 | 0.394  | 0.024  | -0.171 | 0.218  |
| India | Maharashtra-Sindhudurg           | 42  | 0.556 | 0.236  | -0.117 | 0.588  | 0.233  | -0.115 | 0.581  |
| India | Maharashtra-Solapur              | 108 | 0.750 | 0.011  | -0.243 | 0.265  | 0.008  | -0.182 | 0.199  |
| India | Maharashtra-Thane                | 72  | 0.497 | 0.022  | -0.248 | 0.292  | 0.022  | -0.248 | 0.292  |
| India | Maharashtra-Wardha               | 77  | 0.779 | 0.502  | 0.208  | 0.795  | 0.345  | 0.143  | 0.548  |
| India | Maharashtra-Washim               | 81  | 0.660 | -0.078 | -0.346 | 0.190  | -0.070 | -0.311 | 0.171  |
| India | Maharashtra-Yavatmal             | 88  | 0.707 | 0.047  | -0.221 | 0.315  | 0.039  | -0.183 | 0.261  |
| India | Manipur-Bishnupur                | 96  | 0.266 | 0.068  | -0.195 | 0.332  | 0.053  | -0.153 | 0.259  |
| India | Manipur-Chandel                  | 111 | 0.263 | 0.147  | -0.098 | 0.391  | 0.114  | -0.076 | 0.304  |
| India | Manipur-Churachandpur            | 143 | 0.421 | 0.279  | 0.091  | 0.466  | 0.272  | 0.089  | 0.455  |
| India | Manipur-Imphal East              | 107 | 0.271 | 0.268  | 0.025  | 0.511  | 0.212  | 0.020  | 0.404  |
| India | Manipur-Imphal West              | 75  | 0.280 | 0.153  | -0.140 | 0.445  | 0.123  | -0.113 | 0.359  |
| India | Manipur-Senapati                 | 125 | 0.376 | 0.187  | -0.022 | 0.395  | 0.175  | -0.020 | 0.370  |
| India | Manipur-Tamenglong               | 125 | 0.257 | 0.016  | -0.218 | 0.249  | 0.012  | -0.166 | 0.190  |
| India | Manipur-Thoubal                  | 110 | 0.408 | 0.146  | -0.074 | 0.365  | 0.141  | -0.072 | 0.353  |
| India | Manipur-Ukhrul                   | 129 | 0.201 | 0.372  | 0.130  | 0.614  | 0.239  | 0.084  | 0.394  |
| India | Meghalaya-East Garo Hills        | 104 | 0.195 | -0.283 | -0.560 | -0.006 | -0.178 | -0.352 | -0.004 |
| India | Meghalaya-East Jaintia Hills     | 336 | 0.480 | -0.069 | -0.193 | 0.054  | -0.069 | -0.193 | 0.054  |
| India | Meghalaya-East Khasi Hills       | 146 | 0.240 | -0.002 | -0.222 | 0.219  | -0.001 | -0.162 | 0.160  |
| India | Meghalaya-North Garo Hills       | 77  | 0.090 | -0.143 | -0.597 | 0.312  | -0.047 | -0.196 | 0.103  |
| India | Meghalaya-Ribhoi                 | 203 | 0.208 | 0.198  | 0.004  | 0.393  | 0.131  | 0.002  | 0.259  |
| India | Meghalaya-South Garo Hills       | 81  | 0.313 | -0.233 | -0.502 | 0.037  | -0.200 | -0.432 | 0.032  |
| India | Meghalaya-South West Garo Hills  | 104 | 0.438 | -0.393 | -0.606 | -0.181 | -0.387 | -0.597 | -0.178 |
| India | Meghalaya-South West Khasi Hills | 312 | 0.452 | -0.097 | -0.226 | 0.031  | -0.096 | -0.224 | 0.031  |
| India | Meghalaya-West Garo Hills        | 88  | 0.289 | -0.534 | -0.778 | -0.289 | -0.439 | -0.640 | -0.238 |
| India | Meghalaya-West Jaintia Hills     | 256 | 0.481 | -0.007 | -0.149 | 0.136  | -0.007 | -0.148 | 0.135  |
| India | Meghalaya-West Khasi Hills       | 360 | 0.393 | 0.129  | 0.007  | 0.250  | 0.123  | 0.006  | 0.239  |
| India | Mizoram-Aizawl                   | 87  | 0.529 | 0.128  | -0.116 | 0.373  | 0.128  | -0.116 | 0.371  |
| India | Mizoram-Champhai                 | 70  | 0.660 | 0.169  | -0.118 | 0.456  | 0.152  | -0.106 | 0.409  |
| India | Mizoram-Kolasib                  | 110 | 0.698 | 0.233  | 0.000  | 0.466  | 0.196  | 0.000  | 0.393  |
| India | Mizoram-Lawngtlai                | 123 | 0.571 | 0.156  | -0.050 | 0.362  | 0.152  | -0.049 | 0.354  |
| India | Mizoram-Lunglei                  | 59  | 0.519 | -0.068 | -0.368 | 0.231  | -0.068 | -0.367 | 0.231  |
| India | Mizoram-Mamit                    | 101 | 0.577 | 0.399  | 0.182  | 0.615  | 0.389  | 0.178  | 0.600  |
| India | Mizoram-Saiha                    | 125 | 0.401 | 0.003  | -0.205 | 0.211  | 0.003  | -0.197 | 0.203  |
| India | Mizoram-Serchhip                 | 138 | 0.581 | -0.049 | -0.245 | 0.148  | -0.047 | -0.239 | 0.144  |
| India | Nagaland-Dimapur                 | 82  | 0.267 | 0.026  | -0.259 | 0.312  | 0.021  | -0.203 | 0.245  |
| India | Nagaland-Kiphire                 | 103 | 0.264 | -0.048 | -0.303 | 0.208  | -0.037 | -0.235 | 0.161  |
| India | Nagaland-Kohima                  | 62  | 0.617 | -0.117 | -0.416 | 0.182  | -0.111 | -0.393 | 0.172  |
| India | Nagaland-Longleng                | 116 | 0.280 | 0.176  | -0.057 | 0.410  | 0.142  | -0.046 | 0.331  |
| India | Nagaland-Mokokchung              | 62  | 0.682 | 0.350  | 0.049  | 0.651  | 0.304  | 0.043  | 0.565  |
| India | Nagaland-Mon                     | 84  | 0.437 | 0.301  | 0.058  | 0.545  | 0.297  | 0.057  | 0.536  |
| India | Nagaland-Peren                   | 115 | 0.335 | 0.150  | -0.074 | 0.374  | 0.134  | -0.066 | 0.333  |
| India | Nagaland-Phek                    | 107 | 0.416 | 0.204  | -0.017 | 0.425  | 0.198  | -0.016 | 0.413  |
| India | Nagaland-Tuensang                | 136 | 0.328 | -0.027 | -0.235 | 0.181  | -0.023 | -0.207 | 0.160  |
| India | Nagaland-Wokha                   | 52  | 0.391 | 0.363  | 0.051  | 0.675  | 0.346  | 0.049  | 0.643  |
| India | Nagaland-Zunheboto               | 75  | 0.342 | 0.023  | -0.256 | 0.302  | 0.021  | -0.230 | 0.272  |
| India | Nct Of Delhi-Central             | 75  | 0.760 | 0.242  | -0.063 | 0.546  | 0.176  | -0.046 | 0.399  |
| India | Nct Of Delhi-East                | 94  | 0.682 | 0.143  | -0.109 | 0.394  | 0.124  | -0.095 | 0.342  |
| India | Nct Of Delhi-New Delhi           | 99  | 0.679 | 0.081  | -0.165 | 0.326  | 0.070  | -0.144 | 0.284  |
| India | Nct Of Delhi-North               | 103 | 0.562 | 0.001  | -0.226 | 0.227  | 0.001  | -0.223 | 0.224  |
| India | Nct Of Delhi-North East          | 99  | 0.813 | 0.398  | 0.114  | 0.682  | 0.242  | 0.069  | 0.414  |
| India | Nct Of Delhi-North West          | 90  | 0.815 | -0.242 | -0.548 | 0.065  | -0.146 | -0.331 | 0.039  |
| India | Nct Of Delhi-Shahdara            | 91  | 0.688 | -0.098 | -0.356 | 0.160  | -0.084 | -0.306 | 0.137  |

|       |                                   |     |       |        |        |       |        |        |       |
|-------|-----------------------------------|-----|-------|--------|--------|-------|--------|--------|-------|
| India | Nct Of Delhi-South                | 81  | 0.817 | 0.187  | -0.139 | 0.514 | 0.112  | -0.083 | 0.308 |
| India | Nct Of Delhi-South East           | 80  | 0.718 | 0.091  | -0.193 | 0.375 | 0.074  | -0.156 | 0.303 |
| India | Nct Of Delhi-South West           | 83  | 0.852 | 0.356  | 0.010  | 0.701 | 0.179  | 0.005  | 0.354 |
| India | Nct Of Delhi-West                 | 115 | 0.686 | 0.292  | 0.069  | 0.515 | 0.252  | 0.060  | 0.444 |
| India | Odisha-Anugul                     | 97  | 0.822 | 0.268  | -0.031 | 0.566 | 0.157  | -0.018 | 0.332 |
| India | Odisha-Balangir                   | 94  | 0.936 | 0.773  | 0.318  | 1.227 | 0.186  | 0.077  | 0.295 |
| India | Odisha-Baleshwar                  | 77  | 0.834 | 0.166  | -0.183 | 0.515 | 0.092  | -0.101 | 0.285 |
| India | Odisha-Bargarh                    | 81  | 0.947 | -0.301 | -0.863 | 0.262 | -0.061 | -0.174 | 0.053 |
| India | Odisha-Baudh                      | 99  | 0.878 | 0.301  | -0.045 | 0.647 | 0.129  | -0.019 | 0.277 |
| India | Odisha-Bhadrak                    | 100 | 0.811 | 0.129  | -0.162 | 0.420 | 0.079  | -0.099 | 0.258 |
| India | Odisha-Cuttack                    | 77  | 0.852 | -0.124 | -0.490 | 0.243 | -0.063 | -0.248 | 0.123 |
| India | Odisha-Debagarh                   | 67  | 0.881 | 0.484  | 0.066  | 0.901 | 0.202  | 0.028  | 0.377 |
| India | Odisha-Dhenkanal                  | 82  | 0.854 | -0.110 | -0.468 | 0.248 | -0.055 | -0.233 | 0.123 |
| India | Odisha-Gajapati                   | 104 | 0.866 | 0.062  | -0.266 | 0.391 | 0.029  | -0.124 | 0.182 |
| India | Odisha-Ganjam                     | 97  | 0.883 | 0.476  | 0.129  | 0.824 | 0.197  | 0.053  | 0.342 |
| India | Odisha-Jagatsinghapur             | 72  | 0.856 | 0.535  | 0.171  | 0.898 | 0.264  | 0.084  | 0.444 |
| India | Odisha-Jajapur                    | 86  | 0.805 | 0.086  | -0.225 | 0.396 | 0.054  | -0.142 | 0.249 |
| India | Odisha-Jharsuguda                 | 74  | 0.966 | 0.122  | -0.613 | 0.856 | 0.016  | -0.081 | 0.113 |
| India | Odisha-Kalahandi                  | 100 | 0.858 | -0.138 | -0.464 | 0.188 | -0.067 | -0.226 | 0.092 |
| India | Odisha-Kandhamal                  | 142 | 0.917 | 0.237  | -0.107 | 0.580 | 0.072  | -0.033 | 0.178 |
| India | Odisha-Kendrapara                 | 79  | 0.792 | -0.012 | -0.330 | 0.305 | -0.008 | -0.218 | 0.201 |
| India | Odisha-Kendujhar                  | 95  | 0.695 | 0.269  | 0.020  | 0.518 | 0.228  | 0.017  | 0.439 |
| India | Odisha-Khordha                    | 82  | 0.907 | -0.324 | -0.753 | 0.106 | -0.109 | -0.254 | 0.036 |
| India | Odisha-Koraput                    | 111 | 0.943 | 0.042  | -0.427 | 0.512 | 0.009  | -0.091 | 0.109 |
| India | Odisha-Malkangiri                 | 141 | 0.869 | 0.482  | 0.209  | 0.756 | 0.219  | 0.095  | 0.343 |
| India | Odisha-Mayurbhanj                 | 92  | 0.706 | 0.366  | 0.115  | 0.616 | 0.303  | 0.095  | 0.512 |
| India | Odisha-Nabarangapur               | 146 | 0.911 | -0.019 | -0.351 | 0.313 | -0.006 | -0.113 | 0.101 |
| India | Odisha-Nayagarh                   | 90  | 0.926 | -0.115 | -0.577 | 0.346 | -0.031 | -0.157 | 0.094 |
| India | Odisha-Nuapada                    | 110 | 0.928 | 0.507  | 0.097  | 0.918 | 0.135  | 0.026  | 0.245 |
| India | Odisha-Puri                       | 73  | 0.943 | 0.073  | -0.505 | 0.652 | 0.016  | -0.109 | 0.140 |
| India | Odisha-Rayagada                   | 134 | 0.853 | 0.195  | -0.081 | 0.471 | 0.098  | -0.040 | 0.237 |
| India | Odisha-Sambalpur                  | 81  | 0.941 | -0.183 | -0.723 | 0.357 | -0.040 | -0.160 | 0.079 |
| India | Odisha-Subarnapur                 | 94  | 0.905 | -0.227 | -0.627 | 0.174 | -0.078 | -0.215 | 0.060 |
| India | Odisha-Sundargarh                 | 63  | 0.758 | 0.169  | -0.166 | 0.505 | 0.124  | -0.122 | 0.371 |
| India | Puducherry-Karaikal               | 74  | 0.785 | 0.192  | -0.129 | 0.514 | 0.130  | -0.087 | 0.346 |
| India | Puducherry-Mahe                   | 55  | 0.944 | 0.314  | -0.357 | 0.984 | 0.066  | -0.076 | 0.208 |
| India | Puducherry-Puducherry             | 70  | 0.851 | 0.015  | -0.370 | 0.401 | 0.008  | -0.188 | 0.203 |
| India | Puducherry-Yanam                  | 74  | 0.731 | 0.009  | -0.292 | 0.309 | 0.007  | -0.230 | 0.243 |
| India | Punjab-Amritsar                   | 90  | 0.484 | -0.092 | -0.333 | 0.148 | -0.092 | -0.332 | 0.148 |
| India | Punjab-Barnala                    | 73  | 0.621 | 0.105  | -0.170 | 0.381 | 0.099  | -0.160 | 0.359 |
| India | Punjab-Bathinda                   | 73  | 0.469 | -0.043 | -0.312 | 0.226 | -0.043 | -0.311 | 0.225 |
| India | Punjab-Faridkot                   | 85  | 0.555 | 0.050  | -0.200 | 0.299 | 0.049  | -0.198 | 0.296 |
| India | Punjab-Fatehgarh Sahib            | 89  | 0.794 | 0.499  | 0.218  | 0.780 | 0.326  | 0.142  | 0.510 |
| India | Punjab-Fazilka                    | 92  | 0.525 | 0.164  | -0.072 | 0.400 | 0.164  | -0.072 | 0.399 |
| India | Punjab-Firozpur                   | 112 | 0.600 | 0.223  | 0.007  | 0.440 | 0.214  | 0.007  | 0.422 |
| India | Punjab-Gurdaspur                  | 85  | 0.547 | 0.217  | -0.028 | 0.462 | 0.215  | -0.028 | 0.458 |
| India | Punjab-Hoshiarpur                 | 72  | 0.726 | 0.036  | -0.268 | 0.339 | 0.028  | -0.213 | 0.269 |
| India | Punjab-Jalandhar                  | 76  | 0.780 | 0.145  | -0.171 | 0.460 | 0.099  | -0.118 | 0.316 |
| India | Punjab-Kapurthala                 | 90  | 0.552 | 0.245  | 0.008  | 0.482 | 0.242  | 0.008  | 0.477 |
| India | Punjab-Ludhiana                   | 75  | 0.586 | 0.184  | -0.082 | 0.449 | 0.178  | -0.079 | 0.436 |
| India | Punjab-Mansa                      | 103 | 0.643 | -0.072 | -0.306 | 0.163 | -0.066 | -0.281 | 0.150 |
| India | Punjab-Moga                       | 92  | 0.659 | 0.249  | 0.003  | 0.496 | 0.224  | 0.003  | 0.445 |
| India | Punjab-Muktsar                    | 82  | 0.551 | 0.342  | 0.099  | 0.585 | 0.339  | 0.098  | 0.579 |
| India | Punjab-Pathankot                  | 84  | 0.535 | 0.064  | -0.186 | 0.314 | 0.064  | -0.185 | 0.313 |
| India | Punjab-Patiala                    | 89  | 0.524 | 0.217  | -0.022 | 0.455 | 0.216  | -0.022 | 0.454 |
| India | Punjab-Rupnagar                   | 77  | 0.658 | 0.127  | -0.146 | 0.401 | 0.115  | -0.132 | 0.361 |
| India | Punjab-Sahibzada Ajit Singh Nagar | 85  | 0.782 | -0.268 | -0.564 | 0.027 | -0.183 | -0.384 | 0.019 |
| India | Punjab-Sangrur                    | 81  | 0.754 | 0.235  | -0.056 | 0.527 | 0.175  | -0.041 | 0.390 |
| India | Punjab-Shahid Bhagat Singh Nagar  | 83  | 0.905 | 0.107  | -0.322 | 0.536 | 0.037  | -0.110 | 0.184 |
| India | Punjab-Tarn Taran                 | 90  | 0.576 | 0.306  | 0.070  | 0.541 | 0.299  | 0.069  | 0.529 |
| India | Rajasthan-Ajmer                   | 90  | 0.432 | -0.052 | -0.296 | 0.191 | -0.052 | -0.290 | 0.187 |
| India | Rajasthan-Alwar                   | 153 | 0.403 | 0.256  | 0.073  | 0.439 | 0.247  | 0.070  | 0.423 |
| India | Rajasthan-Banswara                | 131 | 0.738 | 0.327  | 0.107  | 0.546 | 0.253  | 0.083  | 0.423 |

|       |                            |     |       |        |        |        |        |        |        |
|-------|----------------------------|-----|-------|--------|--------|--------|--------|--------|--------|
| India | Rajasthan-Baran            | 157 | 0.792 | 0.082  | -0.142 | 0.305  | 0.054  | -0.094 | 0.201  |
| India | Rajasthan-Barmer           | 176 | 0.831 | 0.517  | 0.301  | 0.733  | 0.290  | 0.169  | 0.411  |
| India | Rajasthan-Bharatpur        | 161 | 0.382 | 0.053  | -0.131 | 0.238  | 0.050  | -0.124 | 0.224  |
| India | Rajasthan-Bhilwara         | 122 | 0.611 | -0.116 | -0.327 | 0.094  | -0.111 | -0.311 | 0.090  |
| India | Rajasthan-Bikaner          | 180 | 0.555 | -0.029 | -0.199 | 0.142  | -0.028 | -0.197 | 0.140  |
| India | Rajasthan-Bundi            | 139 | 0.710 | 0.088  | -0.124 | 0.301  | 0.073  | -0.102 | 0.248  |
| India | Rajasthan-Chittaurgarh     | 117 | 0.829 | 0.303  | 0.028  | 0.577  | 0.172  | 0.016  | 0.328  |
| India | Rajasthan-Churu            | 157 | 0.532 | 0.142  | -0.039 | 0.322  | 0.141  | -0.039 | 0.321  |
| India | Rajasthan-Dausa            | 143 | 0.679 | 0.012  | -0.192 | 0.216  | 0.010  | -0.168 | 0.188  |
| India | Rajasthan-Dhaulpur         | 177 | 0.647 | 0.033  | -0.146 | 0.211  | 0.030  | -0.134 | 0.193  |
| India | Rajasthan-Dungarpur        | 122 | 0.732 | -0.100 | -0.333 | 0.132  | -0.079 | -0.261 | 0.104  |
| India | Rajasthan-Ganganagar       | 117 | 0.570 | 0.193  | -0.017 | 0.403  | 0.189  | -0.017 | 0.395  |
| India | Rajasthan-Hanumangarh      | 124 | 0.555 | 0.081  | -0.124 | 0.287  | 0.080  | -0.123 | 0.284  |
| India | Rajasthan-Jaipur           | 125 | 0.679 | -0.304 | -0.516 | -0.092 | -0.265 | -0.450 | -0.081 |
| India | Rajasthan-Jaisalmer        | 187 | 0.749 | 0.330  | 0.144  | 0.516  | 0.248  | 0.108  | 0.388  |
| India | Rajasthan-Jalor            | 150 | 0.707 | 0.005  | -0.199 | 0.209  | 0.004  | -0.165 | 0.174  |
| India | Rajasthan-Jhalawar         | 128 | 0.759 | 0.366  | 0.139  | 0.593  | 0.268  | 0.102  | 0.434  |
| India | Rajasthan-Jhunjhunun       | 122 | 0.607 | -0.197 | -0.405 | 0.012  | -0.188 | -0.387 | 0.011  |
| India | Rajasthan-Jodhpur          | 193 | 0.771 | 0.095  | -0.100 | 0.289  | 0.067  | -0.070 | 0.204  |
| India | Rajasthan-Karauli          | 142 | 0.606 | 0.279  | 0.089  | 0.470  | 0.267  | 0.085  | 0.448  |
| India | Rajasthan-Kota             | 113 | 0.719 | 0.187  | -0.049 | 0.423  | 0.151  | -0.040 | 0.342  |
| India | Rajasthan-Nagaur           | 153 | 0.746 | 0.134  | -0.076 | 0.345  | 0.102  | -0.058 | 0.261  |
| India | Rajasthan-Pali             | 129 | 0.848 | 0.458  | 0.190  | 0.726  | 0.236  | 0.098  | 0.374  |
| India | Rajasthan-Pratapgarh       | 138 | 0.736 | 0.159  | -0.060 | 0.377  | 0.123  | -0.046 | 0.293  |
| India | Rajasthan-Rajsamand        | 115 | 0.424 | 0.105  | -0.110 | 0.319  | 0.102  | -0.107 | 0.312  |
| India | Rajasthan-Sawai Madhopur   | 135 | 0.444 | 0.097  | -0.099 | 0.294  | 0.096  | -0.098 | 0.290  |
| India | Rajasthan-Sikar            | 155 | 0.644 | 0.021  | -0.170 | 0.212  | 0.020  | -0.156 | 0.195  |
| India | Rajasthan-Sirohi           | 123 | 0.510 | 0.014  | -0.191 | 0.220  | 0.014  | -0.191 | 0.220  |
| India | Rajasthan-Tonk             | 109 | 0.546 | -0.013 | -0.232 | 0.207  | -0.013 | -0.230 | 0.205  |
| India | Rajasthan-Udaipur          | 124 | 0.766 | -0.049 | -0.291 | 0.193  | -0.035 | -0.208 | 0.138  |
| India | Sikkim-East District       | 50  | 0.299 | 0.011  | -0.345 | 0.368  | 0.009  | -0.290 | 0.308  |
| India | Sikkim-North District      | 52  | 0.387 | -0.090 | -0.417 | 0.238  | -0.085 | -0.396 | 0.225  |
| India | Sikkim-South District      | 55  | 0.580 | -0.082 | -0.396 | 0.232  | -0.080 | -0.386 | 0.226  |
| India | Sikkim-West District       | 56  | 0.907 | 0.237  | -0.290 | 0.764  | 0.080  | -0.098 | 0.257  |
| India | Tamil Nadu-Ariyalur        | 67  | 0.920 | -0.841 | -1.316 | -0.366 | -0.248 | -0.388 | -0.108 |
| India | Tamil Nadu-Chennai         | 44  | 0.882 | 0.236  | -0.299 | 0.772  | 0.099  | -0.125 | 0.322  |
| India | Tamil Nadu-Coimbatore      | 55  | 0.809 | 0.201  | -0.190 | 0.592  | 0.124  | -0.118 | 0.367  |
| India | Tamil Nadu-Cuddalore       | 73  | 0.733 | 0.231  | -0.068 | 0.530  | 0.181  | -0.053 | 0.415  |
| India | Tamil Nadu-Dharmapuri      | 76  | 0.737 | -0.107 | -0.405 | 0.190  | -0.083 | -0.314 | 0.148  |
| India | Tamil Nadu-Dindigul        | 89  | 0.881 | 0.071  | -0.303 | 0.445  | 0.030  | -0.127 | 0.187  |
| India | Tamil Nadu-Erode           | 73  | 0.881 | 0.221  | -0.190 | 0.631  | 0.092  | -0.079 | 0.264  |
| India | Tamil Nadu-Kancheepuram    | 64  | 0.631 | -0.190 | -0.484 | 0.104  | -0.177 | -0.451 | 0.097  |
| India | Tamil Nadu-Kanniyakumari   | 61  | 0.769 | -0.388 | -0.723 | -0.053 | -0.276 | -0.514 | -0.037 |
| India | Tamil Nadu-Karur           | 58  | 0.644 | -0.111 | -0.426 | 0.203  | -0.102 | -0.390 | 0.186  |
| India | Tamil Nadu-Krishnagiri     | 97  | 0.761 | -0.042 | -0.314 | 0.230  | -0.031 | -0.229 | 0.167  |
| India | Tamil Nadu-Madurai         | 72  | 0.689 | -0.005 | -0.297 | 0.288  | -0.004 | -0.254 | 0.246  |
| India | Tamil Nadu-Nagapattinam    | 67  | 0.919 | 0.022  | -0.493 | 0.537  | 0.006  | -0.146 | 0.159  |
| India | Tamil Nadu-Namakkal        | 62  | 0.690 | -0.132 | -0.446 | 0.182  | -0.113 | -0.382 | 0.156  |
| India | Tamil Nadu-Perambalur      | 62  | 0.858 | -0.158 | -0.575 | 0.259  | -0.077 | -0.280 | 0.126  |
| India | Tamil Nadu-Pudukkottai     | 85  | 0.734 | 0.027  | -0.254 | 0.308  | 0.021  | -0.198 | 0.240  |
| India | Tamil Nadu-Ramanathapuram  | 101 | 0.872 | -0.128 | -0.468 | 0.212  | -0.057 | -0.208 | 0.094  |
| India | Tamil Nadu-Salem           | 47  | 0.684 | 0.027  | -0.336 | 0.390  | 0.023  | -0.290 | 0.337  |
| India | Tamil Nadu-Sivaganga       | 84  | 0.848 | 0.222  | -0.123 | 0.567  | 0.114  | -0.063 | 0.292  |
| India | Tamil Nadu-Thanjavur       | 57  | 0.661 | -0.158 | -0.478 | 0.161  | -0.142 | -0.428 | 0.144  |
| India | Tamil Nadu-The Nilgiris    | 59  | 0.678 | 0.191  | -0.126 | 0.508  | 0.167  | -0.110 | 0.444  |
| India | Tamil Nadu-Theni           | 106 | 0.948 | -0.434 | -0.927 | 0.059  | -0.086 | -0.183 | 0.012  |
| India | Tamil Nadu-Thiruvallur     | 73  | 0.802 | -0.067 | -0.403 | 0.270  | -0.042 | -0.256 | 0.172  |
| India | Tamil Nadu-Thiruvarur      | 56  | 0.912 | 0.095  | -0.449 | 0.639  | 0.030  | -0.144 | 0.204  |
| India | Tamil Nadu-Thoothukkudi    | 76  | 0.865 | -0.358 | -0.734 | 0.019  | -0.167 | -0.343 | 0.009  |
| India | Tamil Nadu-Tiruchirappalli | 61  | 0.761 | 0.121  | -0.223 | 0.465  | 0.088  | -0.162 | 0.338  |
| India | Tamil Nadu-Tirunelveli     | 65  | 0.843 | -0.116 | -0.507 | 0.275  | -0.061 | -0.268 | 0.146  |
| India | Tamil Nadu-Tiruppur        | 50  | 0.834 | 0.299  | -0.132 | 0.730  | 0.166  | -0.073 | 0.404  |
| India | Tamil Nadu-Tiruvannamalai  | 64  | 0.882 | 0.636  | 0.221  | 1.052  | 0.266  | 0.092  | 0.439  |

|       |                                    |     |       |        |        |        |        |        |        |
|-------|------------------------------------|-----|-------|--------|--------|--------|--------|--------|--------|
| India | Tamil Nadu-Vellore                 | 95  | 0.835 | 0.013  | -0.303 | 0.329  | 0.007  | -0.167 | 0.182  |
| India | Tamil Nadu-Viluppuram              | 63  | 0.710 | -0.085 | -0.403 | 0.234  | -0.070 | -0.332 | 0.193  |
| India | Tamil Nadu-Virudhunagar            | 72  | 0.677 | -0.201 | -0.486 | 0.084  | -0.176 | -0.426 | 0.074  |
| India | Telangana-Adilabad                 | 111 | 0.680 | 0.247  | 0.019  | 0.475  | 0.215  | 0.017  | 0.413  |
| India | Telangana-Bhadradi Kothagudem      | 64  | 0.787 | -0.363 | -0.702 | -0.024 | -0.243 | -0.471 | -0.016 |
| India | Telangana-Hyderabad                | 73  | 0.634 | 0.223  | -0.051 | 0.497  | 0.207  | -0.047 | 0.461  |
| India | Telangana-Jagitial                 | 73  | 0.729 | -0.115 | -0.415 | 0.186  | -0.091 | -0.329 | 0.147  |
| India | Telangana-Jangoan                  | 75  | 0.812 | -0.077 | -0.416 | 0.261  | -0.047 | -0.254 | 0.159  |
| India | Telangana-Jayashankar Bhupalapally | 52  | 0.829 | -0.078 | -0.502 | 0.347  | -0.044 | -0.285 | 0.197  |
| India | Telangana-Jogulamba Gadwal         | 118 | 0.792 | 0.123  | -0.134 | 0.381  | 0.081  | -0.089 | 0.251  |
| India | Telangana-Kamareddy                | 83  | 0.642 | -0.260 | -0.516 | -0.004 | -0.239 | -0.474 | -0.004 |
| India | Telangana-Karimnagar               | 59  | 0.663 | -0.305 | -0.612 | 0.002  | -0.273 | -0.547 | 0.002  |
| India | Telangana-Khammam                  | 65  | 0.765 | -0.038 | -0.375 | 0.298  | -0.028 | -0.269 | 0.214  |
| India | Telangana-Komaram Bheem Asifabad   | 80  | 0.704 | -0.106 | -0.386 | 0.173  | -0.089 | -0.322 | 0.144  |
| India | Telangana-Mahabubabad              | 56  | 0.642 | 0.018  | -0.303 | 0.339  | 0.016  | -0.279 | 0.312  |
| India | Telangana-Mahabubnagar             | 106 | 0.772 | -0.136 | -0.399 | 0.127  | -0.096 | -0.281 | 0.090  |
| India | Telangana-Mancherial               | 65  | 0.681 | 0.187  | -0.115 | 0.489  | 0.162  | -0.100 | 0.425  |
| India | Telangana-Medak                    | 63  | 0.528 | 0.075  | -0.214 | 0.365  | 0.075  | -0.214 | 0.364  |
| India | Telangana-Medchal-Malkajgiri       | 77  | 0.615 | 0.005  | -0.263 | 0.274  | 0.005  | -0.249 | 0.259  |
| India | Telangana-Nagarkurnool             | 91  | 0.665 | 0.022  | -0.232 | 0.276  | 0.020  | -0.206 | 0.246  |
| India | Telangana-Nalgonda                 | 69  | 0.543 | -0.029 | -0.307 | 0.248  | -0.029 | -0.304 | 0.246  |
| India | Telangana-Nirmal                   | 79  | 0.768 | 0.116  | -0.188 | 0.420  | 0.083  | -0.134 | 0.300  |
| India | Telangana-Nizamabad                | 98  | 0.729 | -0.015 | -0.275 | 0.245  | -0.012 | -0.217 | 0.193  |
| India | Telangana-Peddapalli               | 53  | 0.688 | 0.162  | -0.177 | 0.501  | 0.139  | -0.152 | 0.430  |
| India | Telangana-Rajanna Sircilla         | 73  | 0.737 | -0.292 | -0.589 | 0.006  | -0.226 | -0.457 | 0.004  |
| India | Telangana-Ranga Reddy              | 93  | 0.738 | -0.050 | -0.320 | 0.219  | -0.039 | -0.247 | 0.170  |
| India | Telangana-Sangareddy               | 93  | 0.494 | 0.050  | -0.187 | 0.287  | 0.050  | -0.187 | 0.287  |
| India | Telangana-Siddipet                 | 79  | 0.507 | -0.238 | -0.490 | 0.015  | -0.238 | -0.490 | 0.015  |
| India | Telangana-Suryapet                 | 49  | 0.682 | -0.047 | -0.401 | 0.307  | -0.041 | -0.348 | 0.266  |
| India | Telangana-Vikarabad                | 93  | 0.710 | 0.067  | -0.194 | 0.328  | 0.055  | -0.160 | 0.270  |
| India | Telangana-Wanaparthy               | 76  | 0.662 | 0.160  | -0.116 | 0.435  | 0.143  | -0.104 | 0.390  |
| India | Telangana-Warangal Rural           | 59  | 0.652 | 0.156  | -0.156 | 0.468  | 0.142  | -0.141 | 0.425  |
| India | Telangana-Warangal Urban           | 82  | 0.745 | 0.312  | 0.030  | 0.594  | 0.237  | 0.023  | 0.451  |
| India | Telangana-Yadadri Bhuvanagiri      | 91  | 0.754 | 0.139  | -0.138 | 0.416  | 0.103  | -0.102 | 0.309  |
| India | Tripura-Dhalai                     | 104 | 0.654 | 0.477  | 0.261  | 0.694  | 0.432  | 0.236  | 0.628  |
| India | Tripura-Gomati                     | 78  | 0.212 | 0.135  | -0.181 | 0.451  | 0.090  | -0.121 | 0.301  |
| India | Tripura-Khowai                     | 65  | 0.509 | 0.205  | -0.076 | 0.485  | 0.205  | -0.076 | 0.485  |
| India | Tripura-North Tripura              | 129 | 0.414 | 0.197  | -0.004 | 0.397  | 0.191  | -0.004 | 0.386  |
| India | Tripura-Sepahijala                 | 72  | 0.357 | -0.066 | -0.348 | 0.216  | -0.060 | -0.319 | 0.198  |
| India | Tripura-South Tripura              | 77  | 0.338 | 0.095  | -0.181 | 0.370  | 0.085  | -0.162 | 0.331  |
| India | Tripura-Unakoti                    | 85  | 0.458 | 0.104  | -0.145 | 0.352  | 0.103  | -0.144 | 0.349  |
| India | Tripura-West Tripura               | 61  | 0.666 | -0.363 | -0.661 | -0.064 | -0.322 | -0.588 | -0.057 |
| India | Uttar Pradesh-Agra                 | 166 | 0.633 | -0.092 | -0.275 | 0.091  | -0.086 | -0.255 | 0.084  |
| India | Uttar Pradesh-Aligarh              | 149 | 0.684 | 0.020  | -0.181 | 0.221  | 0.017  | -0.156 | 0.191  |
| India | Uttar Pradesh-Allahabad            | 138 | 0.422 | 0.313  | 0.123  | 0.502  | 0.305  | 0.120  | 0.490  |
| India | Uttar Pradesh-Ambedkar Nagar       | 106 | 0.627 | 0.084  | -0.145 | 0.313  | 0.079  | -0.136 | 0.293  |
| India | Uttar Pradesh-Amethi               | 167 | 0.617 | -0.059 | -0.240 | 0.122  | -0.056 | -0.227 | 0.115  |
| India | Uttar Pradesh-Auraiya              | 141 | 0.592 | -0.137 | -0.331 | 0.057  | -0.132 | -0.319 | 0.055  |
| India | Uttar Pradesh-Azamgarh             | 150 | 0.459 | -0.009 | -0.195 | 0.178  | -0.009 | -0.194 | 0.177  |
| India | Uttar Pradesh-Baghat               | 157 | 0.747 | 0.161  | -0.046 | 0.369  | 0.122  | -0.035 | 0.279  |
| India | Uttar Pradesh-Bahraich             | 209 | 0.325 | 0.328  | 0.166  | 0.490  | 0.288  | 0.146  | 0.430  |
| India | Uttar Pradesh-Ballia               | 116 | 0.408 | 0.203  | -0.010 | 0.415  | 0.196  | -0.009 | 0.401  |
| India | Uttar Pradesh-Balrampur            | 207 | 0.461 | -0.018 | -0.176 | 0.141  | -0.018 | -0.175 | 0.140  |
| India | Uttar Pradesh-Banda                | 131 | 0.423 | 0.021  | -0.180 | 0.223  | 0.021  | -0.176 | 0.218  |
| India | Uttar Pradesh-Bara Banki           | 135 | 0.568 | 0.023  | -0.175 | 0.221  | 0.023  | -0.172 | 0.217  |
| India | Uttar Pradesh-Bareilly             | 126 | 0.691 | -0.165 | -0.383 | 0.053  | -0.141 | -0.327 | 0.045  |
| India | Uttar Pradesh-Basti                | 149 | 0.618 | 0.146  | -0.045 | 0.337  | 0.138  | -0.042 | 0.318  |
| India | Uttar Pradesh-Bijnor               | 134 | 0.833 | 0.053  | -0.211 | 0.317  | 0.030  | -0.117 | 0.176  |
| India | Uttar Pradesh-Budaun               | 169 | 0.674 | 0.026  | -0.160 | 0.213  | 0.023  | -0.141 | 0.187  |
| India | Uttar Pradesh-Bulandshahr          | 179 | 0.677 | 0.007  | -0.175 | 0.189  | 0.006  | -0.153 | 0.165  |
| India | Uttar Pradesh-Chandauli            | 148 | 0.509 | -0.007 | -0.194 | 0.180  | -0.007 | -0.194 | 0.180  |
| India | Uttar Pradesh-Chitrakoot           | 139 | 0.426 | 0.133  | -0.061 | 0.327  | 0.130  | -0.060 | 0.320  |
| India | Uttar Pradesh-Deoria               | 146 | 0.422 | -0.050 | -0.240 | 0.141  | -0.048 | -0.234 | 0.138  |

|       |                                   |     |       |        |        |       |        |        |       |
|-------|-----------------------------------|-----|-------|--------|--------|-------|--------|--------|-------|
| India | Uttar Pradesh-Etah                | 160 | 0.543 | -0.007 | -0.188 | 0.174 | -0.007 | -0.186 | 0.172 |
| India | Uttar Pradesh-Etawah              | 153 | 0.713 | 0.250  | 0.050  | 0.450 | 0.204  | 0.041  | 0.368 |
| India | Uttar Pradesh-Faizabad            | 144 | 0.539 | 0.178  | -0.010 | 0.366 | 0.177  | -0.010 | 0.364 |
| India | Uttar Pradesh-Farrukhabad         | 159 | 0.560 | 0.271  | 0.094  | 0.447 | 0.267  | 0.092  | 0.441 |
| India | Uttar Pradesh-Fatehpur            | 136 | 0.467 | 0.050  | -0.146 | 0.246 | 0.050  | -0.145 | 0.245 |
| India | Uttar Pradesh-Firozabad           | 149 | 0.628 | 0.082  | -0.110 | 0.275 | 0.077  | -0.103 | 0.257 |
| India | Uttar Pradesh-Gautam Buddha Nagar | 96  | 0.667 | 0.237  | -0.006 | 0.480 | 0.211  | -0.005 | 0.426 |
| India | Uttar Pradesh-Ghaziabad           | 84  | 0.677 | 0.028  | -0.239 | 0.295 | 0.025  | -0.209 | 0.258 |
| India | Uttar Pradesh-Ghazipur            | 151 | 0.517 | 0.029  | -0.156 | 0.214 | 0.029  | -0.156 | 0.214 |
| India | Uttar Pradesh-Gonda               | 154 | 0.517 | 0.230  | 0.050  | 0.410 | 0.230  | 0.050  | 0.409 |
| India | Uttar Pradesh-Gorakhpur           | 153 | 0.562 | 0.021  | -0.164 | 0.207 | 0.021  | -0.162 | 0.203 |
| India | Uttar Pradesh-Hamirpur            | 144 | 0.645 | 0.060  | -0.139 | 0.258 | 0.055  | -0.127 | 0.236 |
| India | Uttar Pradesh-Hapur               | 194 | 0.795 | -0.084 | -0.286 | 0.118 | -0.055 | -0.186 | 0.077 |
| India | Uttar Pradesh-Hardoi              | 150 | 0.471 | 0.001  | -0.185 | 0.187 | 0.001  | -0.185 | 0.187 |
| India | Uttar Pradesh-Jalaun              | 132 | 0.548 | 0.083  | -0.116 | 0.282 | 0.082  | -0.115 | 0.279 |
| India | Uttar Pradesh-Jaunpur             | 162 | 0.481 | 0.058  | -0.121 | 0.237 | 0.058  | -0.121 | 0.237 |
| India | Uttar Pradesh-Jhansi              | 131 | 0.436 | -0.065 | -0.266 | 0.135 | -0.064 | -0.262 | 0.133 |
| India | Uttar Pradesh-Jyotiba Phule Nagar | 194 | 0.691 | 0.171  | -0.004 | 0.346 | 0.146  | -0.004 | 0.295 |
| India | Uttar Pradesh-Kannauj             | 169 | 0.461 | 0.089  | -0.086 | 0.264 | 0.088  | -0.086 | 0.262 |
| India | Uttar Pradesh-Kanpur Dehat        | 147 | 0.470 | 0.062  | -0.126 | 0.250 | 0.062  | -0.126 | 0.249 |
| India | Uttar Pradesh-Kanpur Nagar        | 104 | 0.566 | -0.158 | -0.382 | 0.066 | -0.155 | -0.375 | 0.065 |
| India | Uttar Pradesh-Kanshiram Nagar     | 186 | 0.609 | 0.004  | -0.167 | 0.175 | 0.004  | -0.159 | 0.167 |
| India | Uttar Pradesh-Kaushambi           | 159 | 0.538 | -0.107 | -0.287 | 0.073 | -0.106 | -0.286 | 0.073 |
| India | Uttar Pradesh-Kheri               | 175 | 0.617 | 0.110  | -0.066 | 0.287 | 0.104  | -0.062 | 0.271 |
| India | Uttar Pradesh-Kushinagar          | 179 | 0.542 | 0.247  | 0.080  | 0.414 | 0.245  | 0.080  | 0.411 |
| India | Uttar Pradesh-Lalitpur            | 179 | 0.500 | 0.001  | -0.169 | 0.171 | 0.001  | -0.169 | 0.171 |
| India | Uttar Pradesh-Lucknow             | 94  | 0.621 | 0.140  | -0.102 | 0.381 | 0.132  | -0.096 | 0.359 |
| India | Uttar Pradesh-Mahamaya Nagar      | 159 | 0.559 | 0.053  | -0.129 | 0.235 | 0.052  | -0.127 | 0.231 |
| India | Uttar Pradesh-Maharajanj          | 147 | 0.558 | -0.002 | -0.191 | 0.188 | -0.001 | -0.188 | 0.185 |
| India | Uttar Pradesh-Mahoba              | 162 | 0.569 | -0.024 | -0.205 | 0.156 | -0.024 | -0.201 | 0.153 |
| India | Uttar Pradesh-Mainpuri            | 169 | 0.631 | 0.172  | -0.008 | 0.351 | 0.160  | -0.007 | 0.327 |
| India | Uttar Pradesh-Mathura             | 165 | 0.631 | -0.040 | -0.223 | 0.144 | -0.037 | -0.208 | 0.134 |
| India | Uttar Pradesh-Mau                 | 136 | 0.410 | -0.031 | -0.230 | 0.167 | -0.030 | -0.223 | 0.162 |
| India | Uttar Pradesh-Meerut              | 169 | 0.812 | 0.315  | 0.096  | 0.534 | 0.192  | 0.059  | 0.326 |
| India | Uttar Pradesh-Mirzapur            | 160 | 0.583 | 0.058  | -0.125 | 0.240 | 0.056  | -0.121 | 0.234 |
| India | Uttar Pradesh-Moradabad           | 150 | 0.715 | -0.013 | -0.219 | 0.193 | -0.011 | -0.179 | 0.157 |
| India | Uttar Pradesh-Muzaffarnagar       | 130 | 0.713 | 0.225  | 0.007  | 0.442 | 0.184  | 0.006  | 0.362 |
| India | Uttar Pradesh-Pilibhit            | 117 | 0.803 | -0.112 | -0.376 | 0.153 | -0.070 | -0.238 | 0.097 |
| India | Uttar Pradesh-Pratapgarh          | 160 | 0.563 | 0.225  | 0.047  | 0.403 | 0.222  | 0.046  | 0.397 |
| India | Uttar Pradesh-Rae Bareli          | 132 | 0.629 | 0.037  | -0.168 | 0.242 | 0.035  | -0.157 | 0.226 |
| India | Uttar Pradesh-Rampur              | 129 | 0.707 | -0.022 | -0.242 | 0.199 | -0.018 | -0.201 | 0.165 |
| India | Uttar Pradesh-Saharanpur          | 142 | 0.880 | 0.124  | -0.169 | 0.418 | 0.053  | -0.072 | 0.177 |
| India | Uttar Pradesh-Sambhal             | 193 | 0.756 | 0.216  | 0.027  | 0.404 | 0.159  | 0.020  | 0.298 |
| India | Uttar Pradesh-Sant Kabir Nagar    | 170 | 0.641 | 0.045  | -0.137 | 0.227 | 0.041  | -0.126 | 0.209 |
| India | Uttar Pradesh-Sant Ravidas Nagar  | 197 | 0.414 | 0.059  | -0.105 | 0.223 | 0.057  | -0.102 | 0.217 |
| India | Uttar Pradesh-Shahjahanpur        | 190 | 0.732 | 0.091  | -0.095 | 0.277 | 0.071  | -0.075 | 0.217 |
| India | Uttar Pradesh-Shamli              | 159 | 0.860 | -0.034 | -0.294 | 0.227 | -0.016 | -0.141 | 0.109 |
| India | Uttar Pradesh-Shrawasti           | 229 | 0.573 | 0.096  | -0.055 | 0.248 | 0.094  | -0.054 | 0.242 |
| India | Uttar Pradesh-Siddharthnagar      | 222 | 0.603 | 0.085  | -0.070 | 0.241 | 0.082  | -0.067 | 0.231 |
| India | Uttar Pradesh-Sitapur             | 169 | 0.597 | 0.019  | -0.160 | 0.197 | 0.018  | -0.154 | 0.190 |
| India | Uttar Pradesh-Sonbhadra           | 160 | 0.498 | 0.063  | -0.116 | 0.243 | 0.063  | -0.116 | 0.243 |
| India | Uttar Pradesh-Sultanpur           | 146 | 0.579 | 0.118  | -0.072 | 0.308 | 0.115  | -0.070 | 0.300 |
| India | Uttar Pradesh-Unnao               | 104 | 0.432 | 0.052  | -0.174 | 0.278 | 0.051  | -0.171 | 0.273 |
| India | Uttar Pradesh-Varanasi            | 144 | 0.548 | 0.016  | -0.174 | 0.207 | 0.016  | -0.173 | 0.205 |
| India | Uttarakhand-Almora                | 63  | 0.832 | 0.185  | -0.200 | 0.570 | 0.103  | -0.112 | 0.318 |
| India | Uttarakhand-Bageshwar             | 90  | 0.757 | -0.072 | -0.352 | 0.209 | -0.053 | -0.259 | 0.154 |
| India | Uttarakhand-Chamoli               | 90  | 0.767 | 0.033  | -0.252 | 0.318 | 0.023  | -0.181 | 0.227 |
| India | Uttarakhand-Champawat             | 108 | 0.846 | 0.341  | 0.044  | 0.639 | 0.178  | 0.023  | 0.333 |
| India | Uttarakhand-Dehradun              | 81  | 0.750 | -0.098 | -0.391 | 0.195 | -0.074 | -0.294 | 0.146 |
| India | Uttarakhand-Garhwal               | 60  | 0.706 | 0.081  | -0.244 | 0.407 | 0.068  | -0.203 | 0.338 |
| India | Uttarakhand-Hardwar               | 96  | 0.666 | 0.322  | 0.084  | 0.561 | 0.287  | 0.074  | 0.499 |
| India | Uttarakhand-Nainital              | 105 | 0.780 | 0.475  | 0.222  | 0.728 | 0.326  | 0.152  | 0.499 |
| India | Uttarakhand-Pithoragarh           | 87  | 0.824 | 0.121  | -0.200 | 0.443 | 0.070  | -0.116 | 0.257 |

|           |                                        |     |       |        |        |        |        |        |        |
|-----------|----------------------------------------|-----|-------|--------|--------|--------|--------|--------|--------|
| India     | Uttarakhand-Rudraprayag                | 109 | 0.852 | 0.087  | -0.221 | 0.395  | 0.044  | -0.111 | 0.199  |
| India     | Uttarakhand-Tehri Garhwal              | 91  | 0.788 | 0.585  | 0.318  | 0.853  | 0.391  | 0.212  | 0.569  |
| India     | Uttarakhand-Udham Singh Nagar          | 126 | 0.728 | -0.115 | -0.342 | 0.113  | -0.091 | -0.271 | 0.089  |
| India     | Uttarakhand-Uttarkashi                 | 106 | 0.729 | 0.114  | -0.135 | 0.362  | 0.090  | -0.107 | 0.287  |
| India     | West Bengal-Bankura                    | 84  | 0.786 | 0.115  | -0.189 | 0.418  | 0.077  | -0.127 | 0.281  |
| India     | West Bengal-Birbhum                    | 114 | 0.792 | 0.008  | -0.255 | 0.271  | 0.005  | -0.168 | 0.179  |
| India     | West Bengal-Dakshin Dinajpur           | 97  | 0.910 | -0.129 | -0.533 | 0.275  | -0.042 | -0.175 | 0.091  |
| India     | West Bengal-Darjiling                  | 88  | 0.849 | 0.172  | -0.166 | 0.511  | 0.088  | -0.085 | 0.262  |
| India     | West Bengal-Haora                      | 84  | 0.713 | -0.051 | -0.327 | 0.225  | -0.042 | -0.268 | 0.184  |
| India     | West Bengal-Hugli                      | 75  | 0.685 | 0.235  | -0.045 | 0.515  | 0.203  | -0.039 | 0.444  |
| India     | West Bengal-Jalpaiguri                 | 88  | 0.793 | -0.331 | -0.624 | -0.038 | -0.217 | -0.410 | -0.025 |
| India     | West Bengal-Koch Bihar                 | 118 | 0.839 | 0.231  | -0.052 | 0.514  | 0.125  | -0.028 | 0.277  |
| India     | West Bengal-Kolkata                    | 54  | 0.713 | -0.340 | -0.674 | -0.005 | -0.278 | -0.552 | -0.004 |
| India     | West Bengal-Maldah                     | 137 | 0.744 | 0.068  | -0.154 | 0.291  | 0.052  | -0.118 | 0.222  |
| India     | West Bengal-Murshidabad                | 124 | 0.691 | -0.209 | -0.428 | 0.010  | -0.179 | -0.365 | 0.008  |
| India     | West Bengal-Nadia                      | 77  | 0.812 | 0.182  | -0.150 | 0.514  | 0.111  | -0.092 | 0.314  |
| India     | West Bengal-North Twenty Four Parganas | 77  | 0.928 | 0.545  | 0.056  | 1.034  | 0.146  | 0.015  | 0.278  |
| India     | West Bengal-Paschim Barddhaman         | 98  | 0.618 | -0.035 | -0.273 | 0.202  | -0.033 | -0.258 | 0.191  |
| India     | West Bengal-Paschim Medinipur          | 96  | 0.725 | 0.280  | 0.024  | 0.535  | 0.223  | 0.020  | 0.427  |
| India     | West Bengal-Purba Barddhaman           | 90  | 0.825 | -0.136 | -0.453 | 0.180  | -0.078 | -0.261 | 0.104  |
| India     | West Bengal-Purba Medinipur            | 93  | 0.643 | -0.148 | -0.394 | 0.098  | -0.136 | -0.362 | 0.090  |
| India     | West Bengal-Puruliya                   | 106 | 0.713 | -0.052 | -0.297 | 0.193  | -0.042 | -0.243 | 0.158  |
| India     | West Bengal-South Twenty Four Parganas | 95  | 0.678 | 0.366  | 0.126  | 0.606  | 0.320  | 0.110  | 0.529  |
| India     | West Bengal-Uttar Dinajpur             | 149 | 0.800 | -0.026 | -0.259 | 0.207  | -0.017 | -0.166 | 0.133  |
| Indonesia | Bali                                   | 85  | 0.843 | 0.332  | -0.002 | 0.665  | 0.176  | -0.001 | 0.352  |
| Indonesia | Bangka Belitung                        | 90  | 0.803 | -0.033 | -0.336 | 0.270  | -0.021 | -0.213 | 0.171  |
| Indonesia | Banten                                 | 186 | 0.559 | 0.251  | 0.087  | 0.415  | 0.247  | 0.086  | 0.409  |
| Indonesia | Bengkulu                               | 90  | 0.589 | 0.061  | -0.184 | 0.306  | 0.059  | -0.178 | 0.296  |
| Indonesia | Central Java                           | 357 | 0.825 | 0.023  | -0.135 | 0.181  | 0.013  | -0.078 | 0.105  |
| Indonesia | Central Kalimantan                     | 69  | 0.492 | 0.336  | 0.072  | 0.601  | 0.336  | 0.072  | 0.601  |
| Indonesia | Central Sulawesi                       | 157 | 0.644 | 0.466  | 0.291  | 0.641  | 0.427  | 0.267  | 0.588  |
| Indonesia | Di Aceh                                | 318 | 0.393 | 0.183  | 0.054  | 0.312  | 0.175  | 0.051  | 0.298  |
| Indonesia | Di Yogyakarta                          | 60  | 0.394 | 0.036  | -0.268 | 0.340  | 0.035  | -0.256 | 0.325  |
| Indonesia | Dki Jakarta                            | 189 | 0.681 | -0.166 | -0.343 | 0.011  | -0.144 | -0.298 | 0.010  |
| Indonesia | East Java                              | 371 | 0.759 | 0.140  | 0.003  | 0.277  | 0.102  | 0.002  | 0.203  |
| Indonesia | East Kalimantan                        | 174 | 0.766 | 0.028  | -0.176 | 0.231  | 0.020  | -0.126 | 0.166  |
| Indonesia | East Nusa Tenggara                     | 356 | 0.769 | 0.251  | 0.110  | 0.392  | 0.178  | 0.078  | 0.279  |
| Indonesia | Gorontalo                              | 76  | 0.738 | 0.185  | -0.111 | 0.481  | 0.143  | -0.086 | 0.372  |
| Indonesia | Jambi                                  | 76  | 0.665 | 0.064  | -0.214 | 0.342  | 0.057  | -0.191 | 0.305  |
| Indonesia | Lampung                                | 141 | 0.766 | -0.248 | -0.471 | -0.024 | -0.177 | -0.338 | -0.017 |
| Indonesia | Maluku                                 | 293 | 0.616 | 0.228  | 0.094  | 0.362  | 0.216  | 0.089  | 0.343  |
| Indonesia | North Kalimantan                       | 97  | 0.792 | 0.180  | -0.104 | 0.464  | 0.119  | -0.068 | 0.306  |
| Indonesia | North Maluku                           | 147 | 0.522 | 0.230  | 0.044  | 0.416  | 0.230  | 0.044  | 0.416  |
| Indonesia | North Sulawesi                         | 65  | 0.741 | 0.218  | -0.103 | 0.538  | 0.167  | -0.079 | 0.414  |
| Indonesia | North Sumatera                         | 327 | 0.628 | 0.209  | 0.081  | 0.337  | 0.195  | 0.076  | 0.315  |
| Indonesia | Papua                                  | 100 | 0.534 | 0.223  | -0.002 | 0.448  | 0.222  | -0.002 | 0.446  |
| Indonesia | Riau                                   | 151 | 0.560 | 0.196  | 0.011  | 0.380  | 0.193  | 0.011  | 0.374  |
| Indonesia | Riau Islands                           | 127 | 0.725 | 0.150  | -0.075 | 0.375  | 0.120  | -0.060 | 0.299  |
| Indonesia | South Kalimantan                       | 104 | 0.864 | -0.146 | -0.471 | 0.179  | -0.069 | -0.222 | 0.084  |
| Indonesia | South Sulawesi                         | 193 | 0.728 | 0.137  | -0.047 | 0.321  | 0.108  | -0.037 | 0.254  |
| Indonesia | South Sumatera                         | 136 | 0.669 | 0.118  | -0.089 | 0.325  | 0.104  | -0.079 | 0.288  |
| Indonesia | Southeast Sulawesi                     | 201 | 0.772 | 0.148  | -0.042 | 0.339  | 0.105  | -0.030 | 0.239  |
| Indonesia | West Java                              | 598 | 0.613 | 0.104  | 0.009  | 0.199  | 0.098  | 0.008  | 0.189  |
| Indonesia | West Kalimantan                        | 133 | 0.703 | 0.014  | -0.205 | 0.232  | 0.011  | -0.171 | 0.194  |
| Indonesia | West Nusa Tenggara                     | 169 | 0.779 | -0.104 | -0.315 | 0.107  | -0.071 | -0.216 | 0.073  |
| Indonesia | West Papua                             | 91  | 0.631 | 0.648  | 0.439  | 0.857  | 0.604  | 0.409  | 0.798  |
| Indonesia | West Sulawesi                          | 211 | 0.620 | 0.093  | -0.068 | 0.253  | 0.087  | -0.064 | 0.239  |
| Indonesia | West Sumatera                          | 128 | 0.524 | 0.227  | 0.029  | 0.425  | 0.226  | 0.029  | 0.424  |
| Jordan    | Ajloun                                 | 315 | 0.837 | 0.114  | -0.059 | 0.286  | 0.062  | -0.032 | 0.157  |
| Jordan    | Amman                                  | 361 | 0.816 | 0.069  | -0.085 | 0.223  | 0.041  | -0.051 | 0.134  |
| Jordan    | Aqaba                                  | 232 | 0.753 | 0.087  | -0.086 | 0.259  | 0.065  | -0.064 | 0.193  |
| Jordan    | Balqa                                  | 210 | 0.776 | 0.001  | -0.187 | 0.189  | 0.001  | -0.130 | 0.131  |
| Jordan    | Irbid                                  | 308 | 0.789 | 0.013  | -0.145 | 0.171  | 0.009  | -0.097 | 0.114  |



|         |                 |     |       |        |        |        |        |        |        |
|---------|-----------------|-----|-------|--------|--------|--------|--------|--------|--------|
| Jordan  | Jarash          | 314 | 0.834 | 0.009  | -0.163 | 0.181  | 0.005  | -0.090 | 0.100  |
| Jordan  | Karak           | 202 | 0.811 | -0.110 | -0.314 | 0.094  | -0.068 | -0.193 | 0.057  |
| Jordan  | Ma'an           | 232 | 0.653 | 0.301  | 0.150  | 0.453  | 0.273  | 0.136  | 0.411  |
| Jordan  | Madaba          | 262 | 0.777 | 0.142  | -0.025 | 0.310  | 0.099  | -0.018 | 0.215  |
| Jordan  | Mafraq          | 485 | 0.761 | -0.156 | -0.276 | -0.036 | -0.114 | -0.201 | -0.026 |
| Jordan  | Tafiela         | 291 | 0.856 | 0.220  | 0.032  | 0.408  | 0.109  | 0.016  | 0.201  |
| Jordan  | Zarqa           | 346 | 0.874 | -0.056 | -0.239 | 0.128  | -0.025 | -0.106 | 0.056  |
| Kenya   | Baringo         | 150 | 0.762 | 0.334  | 0.122  | 0.545  | 0.242  | 0.088  | 0.395  |
| Kenya   | Bomet           | 160 | 0.857 | 0.482  | 0.236  | 0.728  | 0.236  | 0.115  | 0.356  |
| Kenya   | Bungoma         | 196 | 0.744 | -0.083 | -0.272 | 0.107  | -0.063 | -0.207 | 0.081  |
| Kenya   | Busia           | 168 | 0.757 | -0.020 | -0.225 | 0.185  | -0.015 | -0.165 | 0.136  |
| Kenya   | Elgeyo Marakwet | 145 | 0.879 | 0.288  | 0.002  | 0.575  | 0.123  | 0.001  | 0.245  |
| Kenya   | Embu            | 90  | 0.822 | -0.065 | -0.380 | 0.249  | -0.038 | -0.223 | 0.146  |
| Kenya   | Garissa         | 158 | 0.540 | -0.081 | -0.263 | 0.100  | -0.081 | -0.261 | 0.099  |
| Kenya   | Homa Bay        | 188 | 0.567 | 0.028  | -0.140 | 0.196  | 0.027  | -0.138 | 0.193  |
| Kenya   | Isiolo          | 174 | 0.789 | -0.162 | -0.372 | 0.048  | -0.108 | -0.248 | 0.032  |
| Kenya   | Kajiado         | 175 | 0.504 | -0.005 | -0.178 | 0.167  | -0.005 | -0.178 | 0.167  |
| Kenya   | Kakamega        | 184 | 0.662 | -0.068 | -0.245 | 0.109  | -0.061 | -0.219 | 0.098  |
| Kenya   | Kericho         | 145 | 0.676 | -0.066 | -0.268 | 0.136  | -0.058 | -0.234 | 0.119  |
| Kenya   | Kiambu          | 113 | 0.762 | 0.054  | -0.199 | 0.307  | 0.040  | -0.144 | 0.223  |
| Kenya   | Kilifi          | 184 | 0.768 | -0.064 | -0.263 | 0.135  | -0.045 | -0.187 | 0.096  |
| Kenya   | Kirinyaga       | 67  | 0.734 | 0.256  | -0.056 | 0.567  | 0.200  | -0.044 | 0.443  |
| Kenya   | Kisii           | 160 | 0.827 | 0.229  | -0.007 | 0.464  | 0.131  | -0.004 | 0.265  |
| Kenya   | Kisumu          | 147 | 0.772 | 0.228  | 0.006  | 0.450  | 0.161  | 0.004  | 0.317  |
| Kenya   | Kitui           | 132 | 0.698 | 0.258  | 0.046  | 0.469  | 0.217  | 0.039  | 0.396  |
| Kenya   | Kwale           | 132 | 0.843 | 0.160  | -0.112 | 0.431  | 0.085  | -0.059 | 0.228  |
| Kenya   | Laikipia        | 130 | 0.765 | 0.391  | 0.165  | 0.617  | 0.281  | 0.119  | 0.443  |
| Kenya   | Lamu            | 121 | 0.656 | -0.034 | -0.255 | 0.187  | -0.031 | -0.230 | 0.169  |
| Kenya   | Machakos        | 118 | 0.885 | 0.100  | -0.229 | 0.430  | 0.041  | -0.093 | 0.174  |
| Kenya   | Makueni         | 129 | 0.845 | 0.145  | -0.131 | 0.422  | 0.076  | -0.069 | 0.221  |
| Kenya   | Mandera         | 155 | 0.272 | 0.199  | -0.004 | 0.402  | 0.158  | -0.003 | 0.318  |
| Kenya   | Marsabit        | 144 | 0.772 | 0.255  | 0.031  | 0.479  | 0.180  | 0.022  | 0.338  |
| Kenya   | Meru            | 109 | 0.826 | 0.107  | -0.181 | 0.395  | 0.062  | -0.104 | 0.227  |
| Kenya   | Migori          | 217 | 0.397 | -0.126 | -0.282 | 0.031  | -0.120 | -0.270 | 0.030  |
| Kenya   | Mombasa         | 107 | 0.687 | -0.207 | -0.446 | 0.031  | -0.179 | -0.384 | 0.026  |
| Kenya   | Murang'a        | 98  | 0.742 | 0.289  | 0.031  | 0.546  | 0.221  | 0.024  | 0.418  |
| Kenya   | Nairobi         | 155 | 0.729 | -0.033 | -0.238 | 0.173  | -0.026 | -0.188 | 0.137  |
| Kenya   | Nakuru          | 164 | 0.777 | 0.029  | -0.185 | 0.242  | 0.020  | -0.128 | 0.168  |
| Kenya   | Nandi           | 154 | 0.932 | 0.435  | 0.077  | 0.793  | 0.110  | 0.020  | 0.201  |
| Kenya   | Narok           | 234 | 0.679 | 0.182  | 0.025  | 0.339  | 0.159  | 0.021  | 0.296  |
| Kenya   | Nyamira         | 116 | 0.913 | 0.117  | -0.258 | 0.491  | 0.037  | -0.082 | 0.157  |
| Kenya   | Nyandarua       | 96  | 0.781 | 0.211  | -0.068 | 0.490  | 0.144  | -0.046 | 0.335  |
| Kenya   | Nyeri           | 118 | 0.722 | 0.006  | -0.228 | 0.241  | 0.005  | -0.183 | 0.193  |
| Kenya   | Samburu         | 198 | 0.633 | 0.333  | 0.172  | 0.494  | 0.309  | 0.160  | 0.459  |
| Kenya   | Siaya           | 151 | 0.706 | -0.010 | -0.214 | 0.193  | -0.009 | -0.178 | 0.160  |
| Kenya   | Taita Taveta    | 90  | 0.828 | 0.450  | 0.145  | 0.755  | 0.257  | 0.083  | 0.431  |
| Kenya   | Tana River      | 209 | 0.630 | -0.091 | -0.253 | 0.072  | -0.085 | -0.236 | 0.067  |
| Kenya   | Tharaka-Nithi   | 97  | 0.881 | -0.073 | -0.432 | 0.286  | -0.031 | -0.181 | 0.119  |
| Kenya   | Trans-Nzoia     | 143 | 0.645 | 0.021  | -0.179 | 0.222  | 0.019  | -0.164 | 0.203  |
| Kenya   | Turkana         | 174 | 0.537 | -0.006 | -0.180 | 0.168  | -0.006 | -0.179 | 0.167  |
| Kenya   | Uasin Gishu     | 154 | 0.697 | 0.003  | -0.197 | 0.203  | 0.002  | -0.166 | 0.171  |
| Kenya   | Vihiga          | 134 | 0.905 | 0.108  | -0.227 | 0.443  | 0.037  | -0.078 | 0.153  |
| Kenya   | Wajir           | 191 | 0.456 | 0.130  | -0.034 | 0.295  | 0.129  | -0.034 | 0.293  |
| Kenya   | West Pokot      | 194 | 0.411 | -0.006 | -0.173 | 0.161  | -0.006 | -0.167 | 0.156  |
| Lesotho | Berea           | 120 | 0.726 | 0.193  | -0.038 | 0.424  | 0.154  | -0.030 | 0.337  |
| Lesotho | Butha-Buthe     | 96  | 0.680 | 0.234  | -0.011 | 0.480  | 0.204  | -0.010 | 0.418  |
| Lesotho | Leribe          | 130 | 0.730 | -0.132 | -0.357 | 0.092  | -0.104 | -0.281 | 0.072  |
| Lesotho | Mafeteng        | 79  | 0.742 | 0.035  | -0.259 | 0.330  | 0.027  | -0.198 | 0.253  |
| Lesotho | Maseru          | 123 | 0.695 | -0.015 | -0.239 | 0.208  | -0.013 | -0.202 | 0.177  |
| Lesotho | Mohale's Hoek   | 99  | 0.643 | 0.027  | -0.213 | 0.267  | 0.025  | -0.195 | 0.245  |
| Lesotho | Mokhotlong      | 104 | 0.524 | -0.019 | -0.244 | 0.205  | -0.019 | -0.243 | 0.204  |
| Lesotho | Qacha's Nek     | 78  | 0.784 | 0.130  | -0.184 | 0.444  | 0.088  | -0.125 | 0.301  |
| Lesotho | Quthing         | 88  | 0.615 | 0.037  | -0.214 | 0.287  | 0.035  | -0.203 | 0.272  |

|            |                              |     |       |        |        |        |        |        |        |
|------------|------------------------------|-----|-------|--------|--------|--------|--------|--------|--------|
| Lesotho    | Thaba-Tseka                  | 112 | 0.634 | 0.150  | -0.072 | 0.373  | 0.140  | -0.067 | 0.346  |
| Liberia    | Bomi                         | 82  | 0.562 | -0.085 | -0.339 | 0.169  | -0.083 | -0.334 | 0.167  |
| Liberia    | Bong                         | 163 | 0.439 | 0.087  | -0.092 | 0.266  | 0.086  | -0.091 | 0.262  |
| Liberia    | Gbarpolu                     | 98  | 0.472 | 0.271  | 0.046  | 0.496  | 0.270  | 0.046  | 0.495  |
| Liberia    | Grand Bassa                  | 145 | 0.335 | 0.222  | 0.025  | 0.419  | 0.197  | 0.022  | 0.373  |
| Liberia    | Grand Cape Mount             | 104 | 0.540 | -0.063 | -0.288 | 0.161  | -0.063 | -0.286 | 0.160  |
| Liberia    | Grand Gedeh                  | 85  | 0.414 | 0.158  | -0.092 | 0.407  | 0.153  | -0.090 | 0.395  |
| Liberia    | Grand Kru                    | 104 | 0.514 | 0.201  | -0.020 | 0.421  | 0.200  | -0.020 | 0.421  |
| Liberia    | Lofa                         | 125 | 0.646 | -0.051 | -0.264 | 0.162  | -0.047 | -0.241 | 0.148  |
| Liberia    | Margibi                      | 89  | 0.328 | 0.219  | -0.035 | 0.473  | 0.193  | -0.031 | 0.417  |
| Liberia    | Maryland                     | 117 | 0.556 | 0.416  | 0.218  | 0.615  | 0.411  | 0.215  | 0.607  |
| Liberia    | Montserrado Incl. Monrovia   | 194 | 0.468 | 0.113  | -0.050 | 0.276  | 0.112  | -0.050 | 0.275  |
| Liberia    | Nimba                        | 203 | 0.504 | -0.019 | -0.178 | 0.141  | -0.019 | -0.178 | 0.141  |
| Liberia    | River Cess                   | 83  | 0.401 | -0.017 | -0.274 | 0.239  | -0.016 | -0.263 | 0.230  |
| Liberia    | River Gee                    | 77  | 0.343 | 0.140  | -0.133 | 0.413  | 0.126  | -0.120 | 0.373  |
| Liberia    | Sinoe                        | 102 | 0.310 | 0.306  | 0.069  | 0.544  | 0.262  | 0.059  | 0.465  |
| Madagascar | Alaotra Mangoro              | 137 | 0.591 | 0.511  | 0.333  | 0.690  | 0.495  | 0.322  | 0.667  |
| Madagascar | Amoron'i Mania               | 196 | 0.737 | 0.350  | 0.173  | 0.528  | 0.272  | 0.134  | 0.410  |
| Madagascar | Analamanga Excluding Capital | 139 | 0.732 | -0.144 | -0.361 | 0.073  | -0.113 | -0.284 | 0.057  |
| Madagascar | Analanjirifo                 | 149 | 0.556 | 0.334  | 0.154  | 0.514  | 0.330  | 0.153  | 0.508  |
| Madagascar | Androy                       | 273 | 0.331 | 0.088  | -0.058 | 0.233  | 0.078  | -0.051 | 0.207  |
| Madagascar | Anosy                        | 207 | 0.385 | 0.133  | -0.028 | 0.295  | 0.126  | -0.027 | 0.279  |
| Madagascar | Antananarivo Capital         | 213 | 0.588 | 0.237  | 0.082  | 0.392  | 0.230  | 0.080  | 0.380  |
| Madagascar | Atsimo Andrefana             | 217 | 0.307 | 0.069  | -0.098 | 0.236  | 0.059  | -0.084 | 0.201  |
| Madagascar | Atsimo Atsinanana            | 207 | 0.440 | 0.351  | 0.199  | 0.502  | 0.346  | 0.196  | 0.495  |
| Madagascar | Atsinanana                   | 160 | 0.359 | 0.225  | 0.040  | 0.409  | 0.207  | 0.037  | 0.376  |
| Madagascar | Betsiboka                    | 179 | 0.336 | 0.167  | -0.012 | 0.345  | 0.149  | -0.011 | 0.308  |
| Madagascar | Boeny                        | 117 | 0.423 | 0.379  | 0.177  | 0.581  | 0.370  | 0.173  | 0.568  |
| Madagascar | Bongolava                    | 193 | 0.555 | 0.228  | 0.067  | 0.390  | 0.225  | 0.066  | 0.385  |
| Madagascar | Diana                        | 151 | 0.460 | 0.162  | -0.022 | 0.346  | 0.161  | -0.022 | 0.344  |
| Madagascar | Haute Matsiatra              | 184 | 0.625 | 0.026  | -0.147 | 0.199  | 0.025  | -0.138 | 0.187  |
| Madagascar | Ihorombe                     | 211 | 0.419 | 0.194  | 0.038  | 0.350  | 0.189  | 0.037  | 0.341  |
| Madagascar | Itasy                        | 178 | 0.777 | -0.034 | -0.239 | 0.171  | -0.024 | -0.166 | 0.118  |
| Madagascar | Melaky                       | 157 | 0.352 | 0.423  | 0.245  | 0.602  | 0.386  | 0.224  | 0.549  |
| Madagascar | Menabe                       | 139 | 0.361 | 0.074  | -0.127 | 0.275  | 0.069  | -0.117 | 0.254  |
| Madagascar | Sava                         | 148 | 0.257 | 0.319  | 0.111  | 0.527  | 0.244  | 0.085  | 0.403  |
| Madagascar | Sofia                        | 140 | 0.378 | 0.476  | 0.293  | 0.658  | 0.447  | 0.276  | 0.618  |
| Madagascar | Vakinankaratra               | 167 | 0.671 | 0.012  | -0.175 | 0.200  | 0.011  | -0.155 | 0.176  |
| Madagascar | Vatovavy Fitovinany          | 144 | 0.417 | 0.145  | -0.046 | 0.336  | 0.141  | -0.045 | 0.327  |
| Malawi     | Balaka                       | 196 | 0.696 | 0.156  | -0.019 | 0.331  | 0.132  | -0.016 | 0.281  |
| Malawi     | Blantyre                     | 191 | 0.573 | -0.158 | -0.322 | 0.007  | -0.154 | -0.316 | 0.007  |
| Malawi     | Chikwawa                     | 206 | 0.658 | 0.221  | 0.057  | 0.385  | 0.199  | 0.051  | 0.347  |
| Malawi     | Chiradzulu                   | 161 | 0.793 | 0.026  | -0.195 | 0.247  | 0.017  | -0.128 | 0.163  |
| Malawi     | Chitipa                      | 148 | 0.774 | 0.220  | -0.001 | 0.441  | 0.154  | -0.001 | 0.308  |
| Malawi     | Dedza                        | 192 | 0.717 | 0.410  | 0.238  | 0.583  | 0.333  | 0.193  | 0.473  |
| Malawi     | Dowa                         | 180 | 0.754 | 0.077  | -0.119 | 0.274  | 0.057  | -0.088 | 0.203  |
| Malawi     | Karonga                      | 187 | 0.817 | 0.223  | 0.010  | 0.436  | 0.133  | 0.006  | 0.260  |
| Malawi     | Kasungu                      | 208 | 0.777 | -0.128 | -0.316 | 0.061  | -0.089 | -0.219 | 0.042  |
| Malawi     | Likoma                       | 134 | 0.829 | -0.312 | -0.568 | -0.056 | -0.177 | -0.322 | -0.032 |
| Malawi     | Lilongwe                     | 251 | 0.745 | 0.157  | -0.006 | 0.320  | 0.119  | -0.005 | 0.244  |
| Malawi     | Machinga                     | 238 | 0.669 | 0.057  | -0.100 | 0.213  | 0.050  | -0.088 | 0.189  |
| Malawi     | Mangochi                     | 288 | 0.706 | 0.097  | -0.050 | 0.243  | 0.080  | -0.041 | 0.202  |
| Malawi     | Mchinji                      | 237 | 0.759 | 0.049  | -0.124 | 0.221  | 0.036  | -0.090 | 0.162  |
| Malawi     | Mulanje                      | 193 | 0.763 | -0.062 | -0.254 | 0.131  | -0.044 | -0.184 | 0.095  |
| Malawi     | Mwanza                       | 161 | 0.896 | 0.322  | 0.032  | 0.612  | 0.120  | 0.012  | 0.228  |
| Malawi     | Mzimba                       | 234 | 0.761 | 0.131  | -0.042 | 0.304  | 0.095  | -0.031 | 0.222  |
| Malawi     | Neno                         | 208 | 0.832 | -0.029 | -0.240 | 0.182  | -0.016 | -0.134 | 0.102  |
| Malawi     | Nkhata Bay                   | 184 | 0.652 | 0.084  | -0.092 | 0.260  | 0.076  | -0.083 | 0.236  |
| Malawi     | Nkhotakota                   | 226 | 0.682 | -0.025 | -0.187 | 0.137  | -0.022 | -0.162 | 0.119  |
| Malawi     | Nsanje                       | 198 | 0.642 | -0.075 | -0.243 | 0.094  | -0.069 | -0.223 | 0.086  |
| Malawi     | Ntcheu                       | 221 | 0.710 | 0.129  | -0.039 | 0.296  | 0.106  | -0.032 | 0.244  |
| Malawi     | Ntchisi                      | 187 | 0.655 | 0.168  | -0.005 | 0.341  | 0.152  | -0.005 | 0.308  |
| Malawi     | Phalombe                     | 207 | 0.724 | 0.119  | -0.057 | 0.295  | 0.095  | -0.046 | 0.235  |

|            |                          |     |       |        |        |        |        |        |        |
|------------|--------------------------|-----|-------|--------|--------|--------|--------|--------|--------|
| Malawi     | Rumphi                   | 182 | 0.815 | 0.294  | 0.081  | 0.507  | 0.177  | 0.049  | 0.306  |
| Malawi     | Salima                   | 223 | 0.783 | 0.097  | -0.087 | 0.281  | 0.066  | -0.059 | 0.191  |
| Malawi     | Thyolo                   | 177 | 0.768 | 0.111  | -0.091 | 0.313  | 0.079  | -0.065 | 0.223  |
| Malawi     | Zomba                    | 205 | 0.736 | 0.099  | -0.081 | 0.279  | 0.077  | -0.063 | 0.216  |
| Maldives   | Central                  | 154 | 0.822 | 0.103  | -0.136 | 0.342  | 0.060  | -0.080 | 0.201  |
| Maldives   | Male                     | 87  | 0.802 | -0.043 | -0.351 | 0.265  | -0.027 | -0.223 | 0.168  |
| Maldives   | North                    | 176 | 0.784 | 0.161  | -0.046 | 0.368  | 0.109  | -0.031 | 0.249  |
| Maldives   | North Central            | 207 | 0.751 | 0.042  | -0.141 | 0.225  | 0.031  | -0.105 | 0.168  |
| Maldives   | South                    | 167 | 0.698 | -0.072 | -0.263 | 0.120  | -0.060 | -0.222 | 0.101  |
| Maldives   | South Central            | 228 | 0.754 | 0.125  | -0.049 | 0.299  | 0.092  | -0.037 | 0.222  |
| Mali       | Bamako                   | 400 | 0.447 | 0.162  | 0.049  | 0.274  | 0.160  | 0.048  | 0.271  |
| Mali       | Gao                      | 244 | 0.202 | 0.243  | 0.064  | 0.422  | 0.156  | 0.041  | 0.271  |
| Mali       | Kayes                    | 416 | 0.348 | 0.177  | 0.062  | 0.293  | 0.161  | 0.056  | 0.266  |
| Mali       | Kidal                    | 150 | 0.000 | 0.000  | 0.000  | 0.000  | 0.000  | 0.000  | 0.000  |
| Mali       | Koulikoro                | 448 | 0.389 | 0.032  | -0.077 | 0.142  | 0.031  | -0.074 | 0.135  |
| Mali       | Mopti                    | 264 | 0.413 | 0.047  | -0.095 | 0.189  | 0.045  | -0.092 | 0.183  |
| Mali       | Segou                    | 404 | 0.473 | -0.071 | -0.184 | 0.041  | -0.071 | -0.184 | 0.041  |
| Mali       | Sikasso                  | 566 | 0.393 | 0.014  | -0.083 | 0.112  | 0.014  | -0.079 | 0.107  |
| Mali       | Tombouctou               | 332 | 0.361 | -0.036 | -0.166 | 0.094  | -0.033 | -0.153 | 0.086  |
| Mauritania | Adrar                    | 149 | 0.486 | 0.122  | -0.064 | 0.307  | 0.122  | -0.064 | 0.307  |
| Mauritania | Assaba                   | 323 | 0.351 | -0.181 | -0.312 | -0.050 | -0.165 | -0.284 | -0.046 |
| Mauritania | Brakna                   | 383 | 0.415 | -0.207 | -0.323 | -0.091 | -0.201 | -0.314 | -0.089 |
| Mauritania | Dakhlet Nouadhibou       | 143 | 0.391 | 0.105  | -0.090 | 0.299  | 0.100  | -0.085 | 0.285  |
| Mauritania | Eastern Basin Region     | 363 | 0.259 | 0.036  | -0.100 | 0.171  | 0.027  | -0.077 | 0.132  |
| Mauritania | Gorgol                   | 353 | 0.387 | 0.125  | 0.001  | 0.248  | 0.118  | 0.001  | 0.235  |
| Mauritania | Guidimagha               | 528 | 0.448 | -0.086 | -0.185 | 0.013  | -0.085 | -0.183 | 0.013  |
| Mauritania | North Nouakchott         | 173 | 0.388 | -0.220 | -0.394 | -0.045 | -0.209 | -0.374 | -0.043 |
| Mauritania | South Nouakchott         | 153 | 0.249 | 0.138  | -0.074 | 0.350  | 0.103  | -0.056 | 0.261  |
| Mauritania | Tagant                   | 236 | 0.408 | 0.056  | -0.094 | 0.207  | 0.054  | -0.091 | 0.200  |
| Mauritania | Tiris Zemour And Inchiri | 190 | 0.392 | 0.030  | -0.139 | 0.199  | 0.028  | -0.133 | 0.189  |
| Mauritania | Trarza                   | 252 | 0.183 | -0.048 | -0.233 | 0.137  | -0.029 | -0.139 | 0.082  |
| Mauritania | West Nouakchott          | 119 | 0.312 | -0.041 | -0.267 | 0.185  | -0.035 | -0.229 | 0.158  |
| Mauritania | Western Basin Region     | 380 | 0.503 | 0.165  | 0.050  | 0.280  | 0.165  | 0.050  | 0.280  |
| Myanmar    | Ayeyarwaddy              | 108 | 0.396 | -0.101 | -0.324 | 0.123  | -0.096 | -0.310 | 0.118  |
| Myanmar    | Bago                     | 85  | 0.548 | 0.271  | 0.028  | 0.513  | 0.268  | 0.028  | 0.509  |
| Myanmar    | Chin                     | 147 | 0.550 | 0.211  | 0.026  | 0.397  | 0.209  | 0.025  | 0.393  |
| Myanmar    | Kachin                   | 111 | 0.726 | 0.196  | -0.045 | 0.436  | 0.156  | -0.035 | 0.347  |
| Myanmar    | Kayah                    | 131 | 0.796 | 0.357  | 0.118  | 0.597  | 0.232  | 0.077  | 0.388  |
| Myanmar    | Kayin                    | 117 | 0.621 | 0.529  | 0.333  | 0.725  | 0.498  | 0.314  | 0.682  |
| Myanmar    | Magway                   | 72  | 0.653 | 0.095  | -0.188 | 0.378  | 0.086  | -0.171 | 0.343  |
| Myanmar    | Mandalay                 | 86  | 0.863 | -0.014 | -0.373 | 0.345  | -0.007 | -0.176 | 0.163  |
| Myanmar    | Mon                      | 79  | 0.682 | -0.056 | -0.333 | 0.220  | -0.049 | -0.289 | 0.191  |
| Myanmar    | Naypyitaw                | 81  | 0.494 | 0.422  | 0.185  | 0.659  | 0.422  | 0.185  | 0.659  |
| Myanmar    | Rakhine                  | 127 | 0.420 | 0.185  | -0.019 | 0.389  | 0.180  | -0.019 | 0.379  |
| Myanmar    | Sagaing                  | 99  | 0.707 | 0.052  | -0.200 | 0.304  | 0.043  | -0.166 | 0.252  |
| Myanmar    | Shan                     | 113 | 0.592 | 0.114  | -0.104 | 0.331  | 0.110  | -0.100 | 0.320  |
| Myanmar    | Taninthayi               | 119 | 0.493 | 0.307  | 0.105  | 0.510  | 0.307  | 0.105  | 0.510  |
| Myanmar    | Yangon                   | 85  | 0.772 | 0.202  | -0.091 | 0.495  | 0.142  | -0.064 | 0.349  |
| Nepal      | Province 1               | 254 | 0.814 | -0.036 | -0.220 | 0.147  | -0.022 | -0.133 | 0.089  |
| Nepal      | Province 2               | 346 | 0.712 | 0.082  | -0.053 | 0.216  | 0.067  | -0.043 | 0.177  |
| Nepal      | Province 3               | 174 | 0.750 | -0.009 | -0.208 | 0.191  | -0.007 | -0.156 | 0.143  |
| Nepal      | Province 4               | 180 | 0.941 | 0.259  | -0.099 | 0.618  | 0.058  | -0.022 | 0.137  |
| Nepal      | Province 5               | 267 | 0.850 | 0.046  | -0.149 | 0.240  | 0.023  | -0.076 | 0.122  |
| Nepal      | Province 6               | 272 | 0.776 | 0.076  | -0.089 | 0.241  | 0.053  | -0.062 | 0.168  |
| Nepal      | Province 7               | 217 | 0.837 | 0.124  | -0.085 | 0.332  | 0.067  | -0.046 | 0.181  |
| Nigeria    | Abia                     | 209 | 0.327 | 0.104  | -0.063 | 0.271  | 0.091  | -0.056 | 0.238  |
| Nigeria    | Adamawa                  | 311 | 0.320 | 0.065  | -0.072 | 0.203  | 0.057  | -0.063 | 0.177  |
| Nigeria    | Akwa Ibom                | 179 | 0.357 | 0.091  | -0.086 | 0.268  | 0.083  | -0.079 | 0.246  |
| Nigeria    | Anambra                  | 287 | 0.761 | 0.377  | 0.226  | 0.528  | 0.274  | 0.164  | 0.383  |
| Nigeria    | Bauchi                   | 439 | 0.204 | 0.322  | 0.191  | 0.453  | 0.209  | 0.124  | 0.294  |
| Nigeria    | Bayelsa                  | 201 | 0.122 | 0.141  | -0.103 | 0.385  | 0.061  | -0.044 | 0.166  |
| Nigeria    | Benue                    | 297 | 0.283 | 0.212  | 0.068  | 0.356  | 0.172  | 0.055  | 0.289  |
| Nigeria    | Borno                    | 355 | 0.212 | 0.298  | 0.154  | 0.442  | 0.200  | 0.103  | 0.296  |

|             |                                     |     |       |        |        |        |        |        |        |
|-------------|-------------------------------------|-----|-------|--------|--------|--------|--------|--------|--------|
| Nigeria     | Cross River                         | 142 | 0.488 | 0.185  | -0.004 | 0.374  | 0.185  | -0.004 | 0.374  |
| Nigeria     | Delta                               | 168 | 0.487 | 0.140  | -0.035 | 0.314  | 0.140  | -0.034 | 0.314  |
| Nigeria     | Ebonyi                              | 318 | 0.476 | 0.134  | 0.008  | 0.261  | 0.134  | 0.008  | 0.260  |
| Nigeria     | Edo                                 | 139 | 0.564 | 0.131  | -0.062 | 0.325  | 0.129  | -0.061 | 0.320  |
| Nigeria     | Ekiti                               | 164 | 0.399 | 0.330  | 0.155  | 0.504  | 0.316  | 0.149  | 0.483  |
| Nigeria     | Enugu                               | 202 | 0.362 | 0.080  | -0.086 | 0.246  | 0.074  | -0.080 | 0.227  |
| Nigeria     | Fct-Abuja                           | 241 | 0.470 | 0.238  | 0.094  | 0.381  | 0.237  | 0.094  | 0.380  |
| Nigeria     | Gombe                               | 370 | 0.215 | 0.428  | 0.292  | 0.565  | 0.289  | 0.197  | 0.382  |
| Nigeria     | Imo                                 | 229 | 0.574 | 0.351  | 0.206  | 0.496  | 0.344  | 0.202  | 0.485  |
| Nigeria     | Jigawa                              | 417 | 0.189 | 0.153  | 0.012  | 0.294  | 0.094  | 0.007  | 0.180  |
| Nigeria     | Kaduna                              | 391 | 0.191 | 0.359  | 0.218  | 0.501  | 0.222  | 0.134  | 0.309  |
| Nigeria     | Kano                                | 584 | 0.260 | 0.293  | 0.189  | 0.398  | 0.226  | 0.146  | 0.306  |
| Nigeria     | Katsina                             | 449 | 0.187 | 0.163  | 0.027  | 0.300  | 0.100  | 0.017  | 0.183  |
| Nigeria     | Kebbi                               | 353 | 0.040 | 0.518  | 0.215  | 0.821  | 0.080  | 0.033  | 0.127  |
| Nigeria     | Kogi                                | 168 | 0.308 | 0.214  | 0.026  | 0.401  | 0.182  | 0.023  | 0.342  |
| Nigeria     | Kwara                               | 215 | 0.306 | 0.568  | 0.418  | 0.718  | 0.483  | 0.356  | 0.610  |
| Nigeria     | Lagos                               | 275 | 0.565 | 0.252  | 0.118  | 0.387  | 0.248  | 0.116  | 0.381  |
| Nigeria     | Nasarawa                            | 251 | 0.290 | 0.167  | 0.010  | 0.323  | 0.137  | 0.008  | 0.266  |
| Nigeria     | Niger                               | 354 | 0.189 | 0.387  | 0.239  | 0.536  | 0.238  | 0.146  | 0.329  |
| Nigeria     | Ogun                                | 168 | 0.257 | 0.542  | 0.359  | 0.726  | 0.414  | 0.274  | 0.554  |
| Nigeria     | Ondo                                | 162 | 0.535 | 0.387  | 0.218  | 0.556  | 0.385  | 0.217  | 0.553  |
| Nigeria     | Osun                                | 172 | 0.319 | 0.003  | -0.183 | 0.189  | 0.003  | -0.159 | 0.164  |
| Nigeria     | Oyo                                 | 210 | 0.201 | 0.251  | 0.058  | 0.444  | 0.161  | 0.037  | 0.285  |
| Nigeria     | Plateau                             | 258 | 0.458 | 0.230  | 0.091  | 0.369  | 0.229  | 0.091  | 0.367  |
| Nigeria     | Rivers                              | 219 | 0.407 | 0.278  | 0.126  | 0.430  | 0.268  | 0.121  | 0.415  |
| Nigeria     | Sokoto                              | 299 | 0.045 | 0.272  | -0.042 | 0.586  | 0.047  | -0.007 | 0.101  |
| Nigeria     | Taraba                              | 310 | 0.236 | 0.164  | 0.013  | 0.314  | 0.118  | 0.009  | 0.227  |
| Nigeria     | Yobe                                | 381 | 0.168 | 0.305  | 0.153  | 0.458  | 0.170  | 0.085  | 0.256  |
| Nigeria     | Zamfara                             | 325 | 0.069 | 0.421  | 0.177  | 0.664  | 0.109  | 0.046  | 0.172  |
| Pakistan    | Azad, Jammu And Kashmir             | 449 | 0.771 | 0.211  | 0.086  | 0.337  | 0.149  | 0.061  | 0.238  |
| Pakistan    | Balochistan                         | 456 | 0.358 | 0.325  | 0.218  | 0.431  | 0.298  | 0.200  | 0.397  |
| Pakistan    | Federally Administered Tribal Areas | 364 | 0.306 | 0.095  | -0.034 | 0.223  | 0.080  | -0.029 | 0.190  |
| Pakistan    | Gilgit Baltistan                    | 293 | 0.727 | 0.131  | -0.017 | 0.280  | 0.104  | -0.013 | 0.222  |
| Pakistan    | Islamabad (lct)                     | 271 | 0.744 | 0.115  | -0.043 | 0.272  | 0.087  | -0.033 | 0.208  |
| Pakistan    | Khyber Pakhtunkhwa                  | 664 | 0.554 | 0.367  | 0.283  | 0.451  | 0.362  | 0.279  | 0.445  |
| Pakistan    | Punjab Excluding Islamabad (lct)    | 875 | 0.794 | 0.162  | 0.068  | 0.256  | 0.106  | 0.044  | 0.167  |
|             | Sindh                               |     |       |        |        |        |        |        |        |
|             | Sindh                               |     |       |        |        |        |        |        |        |
| Pakistan    | Sindh                               | 705 | 0.524 | 0.407  | 0.327  | 0.487  | 0.406  | 0.326  | 0.486  |
| Philippines | Armm                                | 289 | 0.204 | 0.123  | -0.042 | 0.288  | 0.080  | -0.027 | 0.187  |
| Philippines | Bicol                               | 251 | 0.741 | 0.030  | -0.133 | 0.194  | 0.023  | -0.102 | 0.149  |
| Philippines | Cagayan Valley                      | 142 | 0.624 | 0.118  | -0.079 | 0.314  | 0.111  | -0.074 | 0.295  |
| Philippines | Calabarzon                          | 193 | 0.730 | 0.069  | -0.115 | 0.253  | 0.054  | -0.091 | 0.199  |
| Philippines | Caraga                              | 207 | 0.765 | 0.262  | 0.079  | 0.444  | 0.188  | 0.057  | 0.320  |
| Philippines | Central Luzon                       | 264 | 0.637 | 0.224  | 0.081  | 0.367  | 0.207  | 0.075  | 0.339  |
| Philippines | Central Visayas                     | 153 | 0.726 | -0.231 | -0.434 | -0.028 | -0.184 | -0.346 | -0.022 |
| Philippines | Cordillera Admin Region             | 218 | 0.767 | 0.329  | 0.152  | 0.506  | 0.235  | 0.109  | 0.362  |
| Philippines | Davao Peninsula                     | 197 | 0.862 | 0.297  | 0.066  | 0.528  | 0.141  | 0.031  | 0.251  |
| Philippines | Eastern Visayas                     | 254 | 0.795 | 0.090  | -0.087 | 0.266  | 0.058  | -0.056 | 0.173  |
| Philippines | Ilocos                              | 114 | 0.676 | 0.144  | -0.083 | 0.371  | 0.126  | -0.073 | 0.325  |
| Philippines | Mimaropa                            | 161 | 0.594 | 0.255  | 0.076  | 0.433  | 0.246  | 0.074  | 0.418  |
| Philippines | National Capital Region             | 267 | 0.748 | 0.169  | 0.010  | 0.328  | 0.128  | 0.008  | 0.247  |
| Philippines | Northern Mindanao                   | 239 | 0.693 | 0.157  | -0.001 | 0.315  | 0.134  | -0.001 | 0.268  |
| Philippines | Soccksargen                         | 185 | 0.425 | 0.311  | 0.148  | 0.474  | 0.304  | 0.145  | 0.464  |
| Philippines | Western Visayas                     | 241 | 0.650 | 0.436  | 0.293  | 0.579  | 0.397  | 0.266  | 0.527  |
| Philippines | Zamboanga Peninsula                 | 148 | 0.586 | 0.188  | 0.000  | 0.376  | 0.182  | 0.000  | 0.365  |
| Rwanda      | East                                | 678 | 0.945 | 0.180  | -0.010 | 0.370  | 0.038  | -0.002 | 0.077  |
| Rwanda      | Kigali                              | 307 | 0.961 | 0.148  | -0.186 | 0.481  | 0.022  | -0.028 | 0.072  |
| Rwanda      | North                               | 423 | 0.926 | 0.059  | -0.151 | 0.269  | 0.016  | -0.042 | 0.074  |
| Rwanda      | South                               | 623 | 0.971 | 0.232  | -0.036 | 0.501  | 0.026  | -0.004 | 0.057  |

|              |                    |     |       |        |        |        |        |        |        |
|--------------|--------------------|-----|-------|--------|--------|--------|--------|--------|--------|
| Rwanda       | West               | 698 | 0.940 | 0.107  | -0.074 | 0.287  | 0.024  | -0.017 | 0.065  |
| Senegal      | Center             | 700 | 0.796 | -0.050 | -0.156 | 0.056  | -0.032 | -0.101 | 0.037  |
| Senegal      | North              | 410 | 0.689 | 0.430  | 0.317  | 0.544  | 0.369  | 0.272  | 0.467  |
| Senegal      | South              | 681 | 0.662 | 0.218  | 0.127  | 0.308  | 0.195  | 0.114  | 0.276  |
| Senegal      | West               | 312 | 0.771 | 0.083  | -0.070 | 0.236  | 0.059  | -0.049 | 0.167  |
| Sierra Leone | Bo                 | 235 | 0.671 | -0.076 | -0.234 | 0.081  | -0.067 | -0.206 | 0.072  |
| Sierra Leone | Bombali            | 180 | 0.514 | 0.047  | -0.123 | 0.216  | 0.046  | -0.123 | 0.216  |
| Sierra Leone | Bonthe             | 186 | 0.592 | 0.029  | -0.140 | 0.199  | 0.028  | -0.136 | 0.192  |
| Sierra Leone | Falaba             | 141 | 0.575 | -0.026 | -0.220 | 0.168  | -0.026 | -0.215 | 0.164  |
| Sierra Leone | Kailahun           | 162 | 0.572 | 0.182  | 0.003  | 0.361  | 0.178  | 0.003  | 0.353  |
| Sierra Leone | Kambia             | 205 | 0.415 | 0.116  | -0.045 | 0.276  | 0.112  | -0.044 | 0.268  |
| Sierra Leone | Karene             | 156 | 0.439 | 0.114  | -0.068 | 0.297  | 0.113  | -0.067 | 0.293  |
| Sierra Leone | Kenema             | 252 | 0.658 | 0.100  | -0.050 | 0.250  | 0.090  | -0.045 | 0.225  |
| Sierra Leone | Koinadugu          | 139 | 0.528 | 0.169  | -0.023 | 0.360  | 0.168  | -0.023 | 0.359  |
| Sierra Leone | Kono               | 181 | 0.582 | -0.031 | -0.202 | 0.141  | -0.030 | -0.197 | 0.137  |
| Sierra Leone | Moyamba            | 227 | 0.651 | 0.036  | -0.122 | 0.194  | 0.033  | -0.111 | 0.176  |
| Sierra Leone | Port Loko          | 202 | 0.443 | -0.106 | -0.266 | 0.054  | -0.105 | -0.263 | 0.054  |
| Sierra Leone | Pujehun            | 178 | 0.614 | 0.094  | -0.081 | 0.268  | 0.089  | -0.077 | 0.254  |
| Sierra Leone | Tonkolili          | 190 | 0.489 | 0.020  | -0.145 | 0.185  | 0.020  | -0.145 | 0.185  |
| Sierra Leone | Western Area Rural | 203 | 0.468 | 0.086  | -0.074 | 0.245  | 0.085  | -0.074 | 0.244  |
| Sierra Leone | Western Area Urban | 193 | 0.473 | 0.103  | -0.060 | 0.267  | 0.103  | -0.060 | 0.266  |
| South Africa | Eastern Cape       | 150 | 0.697 | -0.186 | -0.387 | 0.014  | -0.157 | -0.326 | 0.012  |
| South Africa | Free State         | 97  | 0.723 | 0.120  | -0.138 | 0.379  | 0.096  | -0.111 | 0.303  |
| South Africa | Gauteng            | 115 | 0.509 | 0.181  | -0.029 | 0.391  | 0.181  | -0.029 | 0.391  |
| South Africa | Kwazulu Natal      | 185 | 0.592 | -0.096 | -0.265 | 0.074  | -0.092 | -0.256 | 0.071  |
| South Africa | Limpopo            | 180 | 0.665 | -0.165 | -0.343 | 0.013  | -0.147 | -0.306 | 0.011  |
| South Africa | Mpumalanga         | 162 | 0.663 | 0.000  | -0.190 | 0.189  | 0.000  | -0.169 | 0.169  |
| South Africa | North West         | 135 | 0.479 | -0.156 | -0.351 | 0.038  | -0.156 | -0.350 | 0.038  |
| South Africa | Northern Cape      | 88  | 0.699 | -0.003 | -0.269 | 0.262  | -0.003 | -0.227 | 0.221  |
| South Africa | Western Cape       | 64  | 0.603 | -0.093 | -0.386 | 0.199  | -0.089 | -0.370 | 0.191  |
| Tajikistan   | Drs                | 584 | 0.673 | 0.002  | -0.095 | 0.100  | 0.002  | -0.084 | 0.088  |
| Tajikistan   | Dushanbe           | 277 | 0.695 | -0.072 | -0.127 | -0.017 | -0.061 | -0.108 | -0.014 |
| Tajikistan   | Gbao               | 179 | 0.642 | 0.136  | -0.027 | 0.299  | 0.125  | -0.025 | 0.275  |
| Tajikistan   | Khatlon            | 722 | 0.867 | -0.076 | -0.197 | 0.044  | -0.035 | -0.091 | 0.020  |
| Tajikistan   | Sughd              | 428 | 0.924 | -0.122 | -0.323 | 0.079  | -0.034 | -0.091 | 0.022  |
| Tanzania     | Arusha             | 104 | 0.832 | 0.172  | -0.126 | 0.470  | 0.096  | -0.070 | 0.263  |
| Tanzania     | Dar Es Salaam      | 152 | 0.814 | -0.107 | -0.344 | 0.130  | -0.064 | -0.208 | 0.079  |
| Tanzania     | Dodoma             | 82  | 0.823 | -0.134 | -0.464 | 0.196  | -0.078 | -0.270 | 0.114  |
| Tanzania     | Geita              | 171 | 0.624 | 0.013  | -0.167 | 0.193  | 0.012  | -0.157 | 0.181  |
| Tanzania     | Iringa             | 73  | 0.820 | 0.159  | -0.189 | 0.507  | 0.094  | -0.111 | 0.299  |
| Tanzania     | Kagera             | 122 | 0.895 | 0.186  | -0.150 | 0.522  | 0.070  | -0.056 | 0.195  |
| Tanzania     | Kaskazini Pemba    | 113 | 0.817 | 0.208  | -0.067 | 0.483  | 0.124  | -0.040 | 0.289  |
| Tanzania     | Kaskazini Unguja   | 99  | 0.938 | 0.106  | -0.371 | 0.582  | 0.025  | -0.086 | 0.135  |
| Tanzania     | Katavi             | 164 | 0.606 | 0.321  | 0.146  | 0.496  | 0.306  | 0.139  | 0.474  |
| Tanzania     | Kigoma             | 147 | 0.756 | 0.217  | 0.001  | 0.433  | 0.160  | 0.001  | 0.319  |
| Tanzania     | Kilimanjaro        | 50  | 0.909 | -0.107 | -0.674 | 0.460  | -0.036 | -0.223 | 0.152  |
| Tanzania     | Kusini Pemba       | 103 | 0.811 | 0.110  | -0.177 | 0.397  | 0.067  | -0.108 | 0.243  |
| Tanzania     | Kusini Unguja      | 91  | 0.857 | 0.214  | -0.126 | 0.553  | 0.105  | -0.062 | 0.272  |
| Tanzania     | Lindi              | 79  | 0.744 | 0.337  | 0.051  | 0.623  | 0.257  | 0.039  | 0.474  |
| Tanzania     | Manyara            | 118 | 0.898 | -0.105 | -0.453 | 0.242  | -0.038 | -0.165 | 0.088  |
| Tanzania     | Mara               | 189 | 0.700 | 0.101  | -0.079 | 0.281  | 0.085  | -0.066 | 0.236  |
| Tanzania     | Mbeya              | 73  | 0.673 | 0.186  | -0.097 | 0.469  | 0.164  | -0.086 | 0.413  |
| Tanzania     | Mjini Magharibi    | 112 | 0.788 | -0.168 | -0.430 | 0.094  | -0.112 | -0.287 | 0.063  |
| Tanzania     | Morogoro           | 94  | 0.797 | 0.237  | -0.052 | 0.526  | 0.153  | -0.034 | 0.340  |
| Tanzania     | Mtwara             | 70  | 0.858 | 0.049  | -0.344 | 0.442  | 0.024  | -0.168 | 0.216  |
| Tanzania     | Mwanza             | 130 | 0.596 | 0.252  | 0.053  | 0.451  | 0.243  | 0.051  | 0.435  |
| Tanzania     | Njombe             | 70  | 0.831 | -0.197 | -0.560 | 0.166  | -0.111 | -0.315 | 0.093  |
| Tanzania     | Pwani              | 76  | 0.814 | 0.166  | -0.170 | 0.502  | 0.100  | -0.103 | 0.304  |
| Tanzania     | Rukwa              | 139 | 0.760 | 0.030  | -0.197 | 0.256  | 0.022  | -0.143 | 0.187  |
| Tanzania     | Ruvuma             | 83  | 0.787 | 0.245  | -0.058 | 0.547  | 0.164  | -0.039 | 0.367  |
| Tanzania     | Shinyanga          | 147 | 0.673 | -0.099 | -0.298 | 0.101  | -0.087 | -0.263 | 0.089  |
| Tanzania     | Simiyu             | 209 | 0.735 | 0.089  | -0.089 | 0.267  | 0.069  | -0.069 | 0.208  |
| Tanzania     | Singida            | 125 | 0.767 | 0.273  | 0.036  | 0.509  | 0.195  | 0.026  | 0.364  |

|             |                     |     |       |        |        |        |        |        |        |
|-------------|---------------------|-----|-------|--------|--------|--------|--------|--------|--------|
| Tanzania    | Tabora              | 194 | 0.532 | 0.293  | 0.134  | 0.451  | 0.291  | 0.134  | 0.449  |
| Tanzania    | Tanga               | 106 | 0.774 | 0.109  | -0.155 | 0.374  | 0.076  | -0.109 | 0.262  |
| The Gambia  | Banjul              | 137 | 0.783 | 0.193  | -0.040 | 0.427  | 0.132  | -0.028 | 0.291  |
| The Gambia  | Basse               | 524 | 0.853 | -0.051 | -0.191 | 0.088  | -0.026 | -0.096 | 0.044  |
| The Gambia  | Brikama             | 495 | 0.822 | 0.021  | -0.113 | 0.154  | 0.012  | -0.066 | 0.090  |
| The Gambia  | Janjanbureh         | 300 | 0.826 | 0.071  | -0.102 | 0.243  | 0.041  | -0.059 | 0.140  |
| The Gambia  | Kanifing            | 239 | 0.768 | 0.250  | 0.078  | 0.421  | 0.178  | 0.056  | 0.300  |
| The Gambia  | Kerewan             | 348 | 0.906 | -0.267 | -0.473 | -0.061 | -0.091 | -0.162 | -0.021 |
| The Gambia  | Kuntaur             | 358 | 0.840 | 0.007  | -0.157 | 0.170  | 0.004  | -0.084 | 0.092  |
| The Gambia  | Mansakonko          | 248 | 0.907 | -0.176 | -0.423 | 0.071  | -0.059 | -0.143 | 0.024  |
| Timor-Leste | Aileu               | 169 | 0.568 | -0.059 | -0.235 | 0.118  | -0.058 | -0.231 | 0.116  |
| Timor-Leste | Ainaro              | 185 | 0.287 | 0.216  | 0.034  | 0.398  | 0.177  | 0.027  | 0.326  |
| Timor-Leste | Baucau              | 177 | 0.634 | 0.128  | -0.049 | 0.304  | 0.119  | -0.045 | 0.282  |
| Timor-Leste | Bobonaro            | 197 | 0.469 | 0.105  | -0.057 | 0.266  | 0.104  | -0.057 | 0.265  |
| Timor-Leste | Cova Lima           | 154 | 0.401 | 0.425  | 0.250  | 0.599  | 0.408  | 0.240  | 0.576  |
| Timor-Leste | Dili                | 277 | 0.482 | 0.039  | -0.097 | 0.176  | 0.039  | -0.097 | 0.176  |
| Timor-Leste | Ermera              | 199 | 0.275 | 0.145  | -0.034 | 0.325  | 0.116  | -0.027 | 0.259  |
| Timor-Leste | Lautem              | 161 | 0.565 | 0.118  | -0.062 | 0.298  | 0.116  | -0.061 | 0.293  |
| Timor-Leste | Liquica             | 191 | 0.488 | 0.044  | -0.120 | 0.209  | 0.044  | -0.120 | 0.209  |
| Timor-Leste | Manatuto            | 183 | 0.555 | 0.231  | 0.065  | 0.397  | 0.228  | 0.064  | 0.392  |
| Timor-Leste | Manufahi            | 198 | 0.274 | 0.290  | 0.114  | 0.467  | 0.231  | 0.091  | 0.372  |
| Timor-Leste | Oecussi             | 146 | 0.396 | 0.127  | -0.064 | 0.319  | 0.122  | -0.062 | 0.305  |
| Timor-Leste | Viqueque            | 179 | 0.443 | 0.148  | -0.022 | 0.318  | 0.146  | -0.021 | 0.314  |
| Uganda      | Acholi              | 309 | 0.620 | 0.021  | -0.112 | 0.154  | 0.020  | -0.106 | 0.145  |
| Uganda      | Ankole              | 304 | 0.649 | 0.082  | -0.054 | 0.218  | 0.075  | -0.049 | 0.199  |
| Uganda      | Bugishu             | 254 | 0.441 | 0.054  | -0.089 | 0.198  | 0.053  | -0.088 | 0.195  |
| Uganda      | Bukedi              | 386 | 0.512 | 0.141  | 0.027  | 0.256  | 0.141  | 0.027  | 0.256  |
| Uganda      | Bunyoro             | 340 | 0.625 | 0.084  | -0.043 | 0.211  | 0.079  | -0.040 | 0.198  |
| Uganda      | Busoga              | 445 | 0.509 | 0.053  | -0.055 | 0.160  | 0.053  | -0.055 | 0.160  |
| Uganda      | Central 1           | 413 | 0.440 | -0.114 | -0.226 | -0.002 | -0.113 | -0.223 | -0.002 |
| Uganda      | Central 2           | 403 | 0.467 | 0.200  | 0.089  | 0.312  | 0.199  | 0.088  | 0.310  |
| Uganda      | Kampala             | 264 | 0.451 | 0.067  | -0.073 | 0.207  | 0.067  | -0.072 | 0.205  |
| Uganda      | Karamoja            | 285 | 0.664 | -0.013 | -0.155 | 0.129  | -0.012 | -0.139 | 0.115  |
| Uganda      | Kigezi              | 228 | 0.700 | 0.051  | -0.114 | 0.215  | 0.042  | -0.095 | 0.180  |
| Uganda      | Lango               | 327 | 0.465 | 0.138  | 0.013  | 0.263  | 0.137  | 0.013  | 0.261  |
| Uganda      | Teso                | 387 | 0.642 | 0.145  | 0.026  | 0.265  | 0.134  | 0.024  | 0.243  |
| Uganda      | Tooro               | 400 | 0.535 | -0.020 | -0.133 | 0.094  | -0.020 | -0.133 | 0.094  |
| Uganda      | West Nile           | 382 | 0.636 | 0.090  | -0.030 | 0.210  | 0.083  | -0.028 | 0.195  |
| Zambia      | Central             | 344 | 0.749 | 0.240  | 0.101  | 0.379  | 0.180  | 0.076  | 0.285  |
| Zambia      | Copperbelt          | 300 | 0.802 | -0.031 | -0.196 | 0.133  | -0.020 | -0.124 | 0.085  |
| Zambia      | Eastern             | 395 | 0.790 | -0.031 | -0.171 | 0.109  | -0.021 | -0.114 | 0.072  |
| Zambia      | Luapula             | 396 | 0.645 | 0.186  | 0.068  | 0.304  | 0.170  | 0.063  | 0.278  |
| Zambia      | Lusaka              | 346 | 0.743 | -0.034 | -0.173 | 0.106  | -0.026 | -0.132 | 0.081  |
| Zambia      | Muchinga            | 303 | 0.657 | 0.260  | 0.126  | 0.395  | 0.235  | 0.114  | 0.356  |
| Zambia      | North Western       | 278 | 0.742 | -0.126 | -0.281 | 0.028  | -0.097 | -0.216 | 0.022  |
| Zambia      | Northern            | 316 | 0.782 | 0.255  | 0.103  | 0.407  | 0.174  | 0.070  | 0.278  |
| Zambia      | Southern            | 357 | 0.706 | -0.096 | -0.228 | 0.035  | -0.080 | -0.189 | 0.029  |
| Zambia      | Western             | 288 | 0.638 | 0.066  | -0.073 | 0.205  | 0.061  | -0.067 | 0.190  |
| Zimbabwe    | Bulawayo            | 146 | 0.865 | 0.087  | -0.189 | 0.363  | 0.040  | -0.088 | 0.169  |
| Zimbabwe    | Harare Chitungwiza  | 243 | 0.785 | 0.139  | -0.038 | 0.316  | 0.094  | -0.025 | 0.213  |
| Zimbabwe    | Manicaland          | 211 | 0.695 | 0.166  | -0.003 | 0.334  | 0.141  | -0.002 | 0.284  |
| Zimbabwe    | Mashonaland Central | 224 | 0.773 | 0.290  | 0.113  | 0.467  | 0.204  | 0.079  | 0.328  |
| Zimbabwe    | Mashonaland East    | 181 | 0.859 | 0.210  | -0.031 | 0.451  | 0.102  | -0.015 | 0.218  |
| Zimbabwe    | Mashonaland West    | 227 | 0.689 | 0.087  | -0.075 | 0.250  | 0.075  | -0.064 | 0.214  |
| Zimbabwe    | Masvingo            | 228 | 0.744 | 0.045  | -0.127 | 0.218  | 0.035  | -0.097 | 0.166  |
| Zimbabwe    | Matabeleland North  | 173 | 0.936 | -0.168 | -0.520 | 0.184  | -0.040 | -0.125 | 0.044  |
| Zimbabwe    | Matabeleland South  | 146 | 0.800 | 0.196  | -0.037 | 0.430  | 0.126  | -0.024 | 0.275  |
| Zimbabwe    | Midlands            | 230 | 0.705 | 0.025  | -0.139 | 0.189  | 0.021  | -0.116 | 0.157  |
