# Supplementary material for: Essential childhood immunization in 43 low- and middle-income countries: Analysis of spatial trends and socioeconomic inequalities in vaccine coverage
Source: PubMed Central journal article supplement (PMC9888726; doi:10.1371/journal.pmed.1004166), 2023-01-17
Supplement: pmed.1004166.s006.pdf [file pmed.1004166.s006.pdf]

**Table S6.** Theil index of inequality by country for individual vaccinations, full immunization coverage (FIC), and Wagstaff's (W) and Erreygers' (E) indices of inequality.

| Country      | BCG   | DTP   | OPV   | MCV   | FIC   | W     | E     |
|--------------|-------|-------|-------|-------|-------|-------|-------|
| Afghanistan  | 0.066 | 0.099 | 0.052 | 0.079 | 0.127 | 0.210 | 0.245 |
| Albania      | 0.001 | 0.001 | 0.001 | 0.001 | 0.001 | 0.203 | 0.248 |
| Angola       | 0.027 | 0.069 | 0.078 | 0.040 | 0.106 | 0.103 | 0.113 |
| Armenia      | 0.000 | 0.002 | 0.002 | 0.002 | 0.003 | 0.151 | 0.302 |
| Bangladesh   | 0.000 | 0.000 | 0.000 | 0.000 | 0.000 | 0.133 | 0.065 |
| Benin        | 0.005 | 0.015 | 0.016 | 0.017 | 0.028 | 0.326 | 0.342 |
| Burundi      | 0.000 | 0.000 | 0.002 | 0.000 | 0.004 | 0.362 | 0.378 |
| Cambodia     | 0.001 | 0.004 | 0.004 | 0.004 | 0.007 | 0.230 | 0.337 |
| Cameroon     | 0.004 | 0.014 | 0.009 | 0.013 | 0.024 | 0.187 | 0.195 |
| Chad         | 0.075 | 0.168 | 0.090 | 0.059 | 0.232 | 0.288 | 0.236 |
| Egypt        | 0.000 | 0.000 | 0.000 | 0.020 | 0.024 | 0.342 | 0.347 |
| Ethiopia     | 0.050 | 0.084 | 0.071 | 0.054 | 0.120 | 0.234 | 0.302 |
| Ghana        | 0.000 | 0.002 | 0.003 | 0.001 | 0.005 | 0.154 | 0.174 |
| Guatemala    | 0.000 | 0.001 | 0.001 | 0.002 | 0.003 | 0.205 | 0.229 |
| Guinea       | 0.008 | 0.056 | 0.035 | 0.055 | 0.110 | 0.153 | 0.090 |
| Haiti        | 0.003 | 0.013 | 0.010 | 0.010 | 0.022 | 0.119 | 0.110 |
| India        | 0.001 | 0.004 | 0.008 | 0.022 | 0.037 | 0.329 | 0.309 |
| Indonesia    | 0.003 | 0.011 | 0.013 | 0.006 | 0.017 | 0.243 | 0.274 |
| Jordan       | 0.001 | 0.002 | 0.003 | 0.002 | 0.003 | 0.384 | 0.445 |
| Kenya        | 0.002 | 0.006 | 0.012 | 0.005 | 0.022 | 0.286 | 0.274 |
| Lesotho      | 0.000 | 0.003 | 0.005 | 0.000 | 0.006 | 0.370 | 0.375 |
| Liberia      | 0.001 | 0.007 | 0.016 | 0.004 | 0.023 | 0.183 | 0.180 |
| Madagascar   | 0.017 | 0.030 | 0.035 | 0.028 | 0.047 | 0.255 | 0.267 |
| Malawi       | 0.000 | 0.001 | 0.003 | 0.001 | 0.004 | 0.217 | 0.203 |
| Maldives     | 0.002 | 0.001 | 0.002 | 0.002 | 0.001 | 0.109 | 0.104 |
| Mali         | 0.070 | 0.124 | 0.112 | 0.082 | 0.023 | 0.506 | 0.410 |
| Mauritania   | 0.002 | 0.010 | 0.024 | 0.006 | 0.030 | 0.271 | 0.286 |
| Myanmar      | 0.002 | 0.016 | 0.009 | 0.004 | 0.024 | 0.177 | 0.212 |
| Nepal        | 0.000 | 0.003 | 0.001 | 0.001 | 0.004 | 0.321 | 0.189 |
| Nigeria      | 0.056 | 0.111 | 0.053 | 0.055 | 0.135 | 0.131 | 0.159 |
| Pakistan     | 0.025 | 0.034 | 0.006 | 0.047 | 0.048 | 0.164 | 0.229 |
| Philippines  | 0.009 | 0.024 | 0.019 | 0.018 | 0.031 | 0.144 | 0.142 |
| Rwanda       | 0.000 | 0.000 | 0.000 | 0.000 | 0.000 | 0.106 | 0.055 |
| Senegal      | 0.001 | 0.001 | 0.001 | 0.002 | 0.003 | 0.329 | 0.375 |
| Sierra Leone | 0.000 | 0.003 | 0.004 | 0.003 | 0.011 | 0.319 | 0.322 |
| South Africa | 0.001 | 0.005 | 0.007 | 0.001 | 0.009 | 0.246 | 0.263 |
| Tajikistan   | 0.001 | 0.005 | 0.004 | 0.003 | 0.011 | 0.232 | 0.336 |
| Tanzania     | 0.001 | 0.004 | 0.005 | 0.003 | 0.008 | 0.228 | 0.318 |
| The Gambia   | 0.000 | 0.001 | 0.001 | 0.001 | 0.002 | 0.324 | 0.389 |

|             |       |       |       |       |       |       |       |
|-------------|-------|-------|-------|-------|-------|-------|-------|
| Timor-Leste | 0.007 | 0.015 | 0.028 | 0.008 | 0.033 | 0.203 | 0.197 |
| Uganda      | 0.000 | 0.002 | 0.010 | 0.002 | 0.013 | 0.269 | 0.277 |
| Zambia      | 0.000 | 0.001 | 0.002 | 0.001 | 0.003 | 0.220 | 0.242 |
| Zimbabwe    | 0.002 | 0.004 | 0.004 | 0.003 | 0.005 | 0.204 | 0.248 |

---
