# Supplementary material for: Essential childhood immunization in 43 low- and middle-income countries: Analysis of spatial trends and socioeconomic inequalities in vaccine coverage
Source: PubMed Central journal article supplement (PMC9888726; doi:10.1371/journal.pmed.1004166), 2023-01-17

**Fig S2.** A concentration curve based on DHS survey data from Nigeria for children aged 15 to 35 months. The y-axis shows the cumulative share of children who are fully immunized, and the x-axis shows the cumulative share of children ranked by wealth index from the poorest to the richest. The green 45° line represents a state of perfect equality.

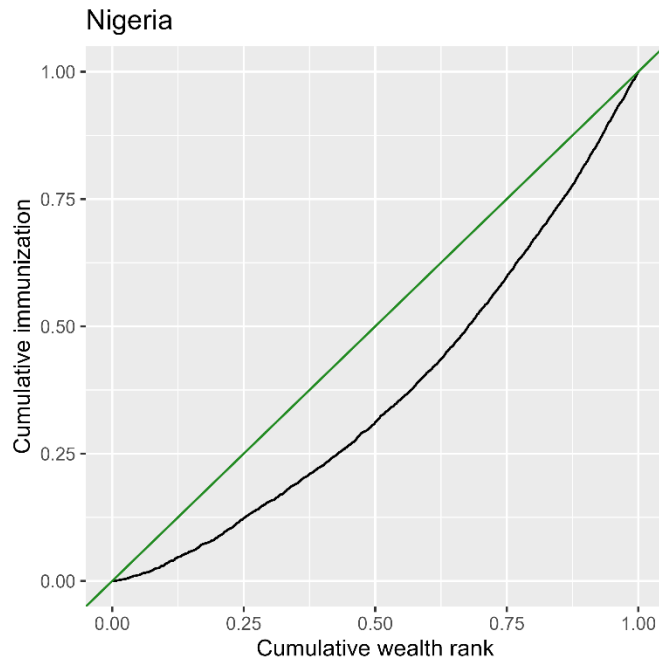

Supplement: pmed.1004166.s008.pdf [file pmed.1004166.s008.pdf]
