# Supplementary material for: Essential childhood immunization in 43 low- and middle-income countries: Analysis of spatial trends and socioeconomic inequalities in vaccine coverage
Source: PubMed Central journal article supplement (PMC9888726; doi:10.1371/journal.pmed.1004166), 2023-01-17

**Fig S3.** Subnational estimates of Wagstaff's (a) and Erreygers' (b) indices of inequality statistically significant at 95 percent level. Spatial boundaries were retrieved from Natural Earth (<https://www.naturalearthdata.com/>) using "rnaturalearth" package (<https://github.com/ropenscilabs/rnaturalearth>).

a. Wagstaff's index of inequality (W)

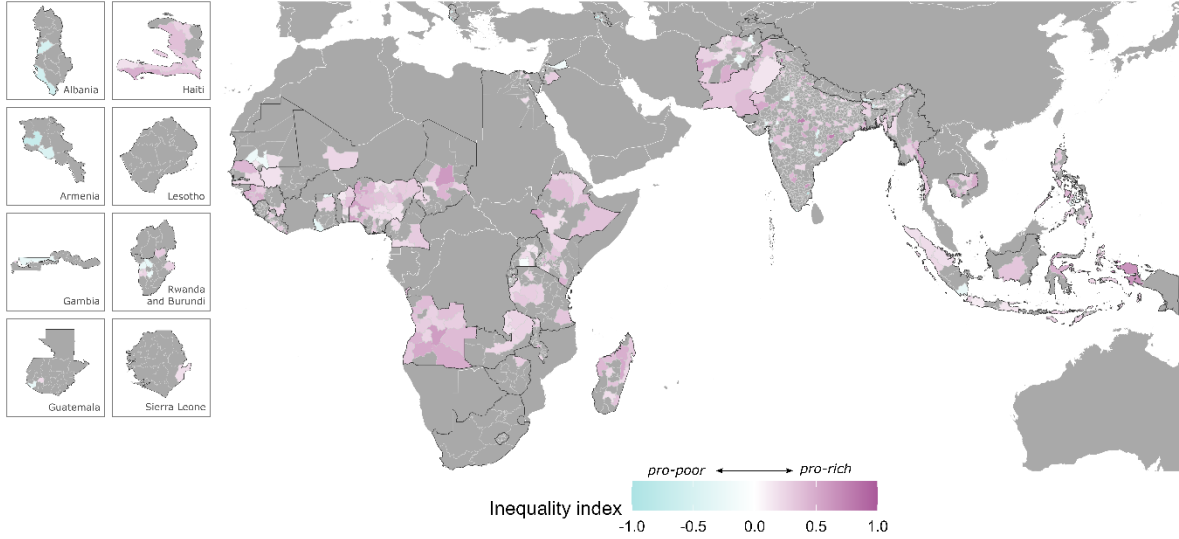

b. Erreygers' index of inequality (E)

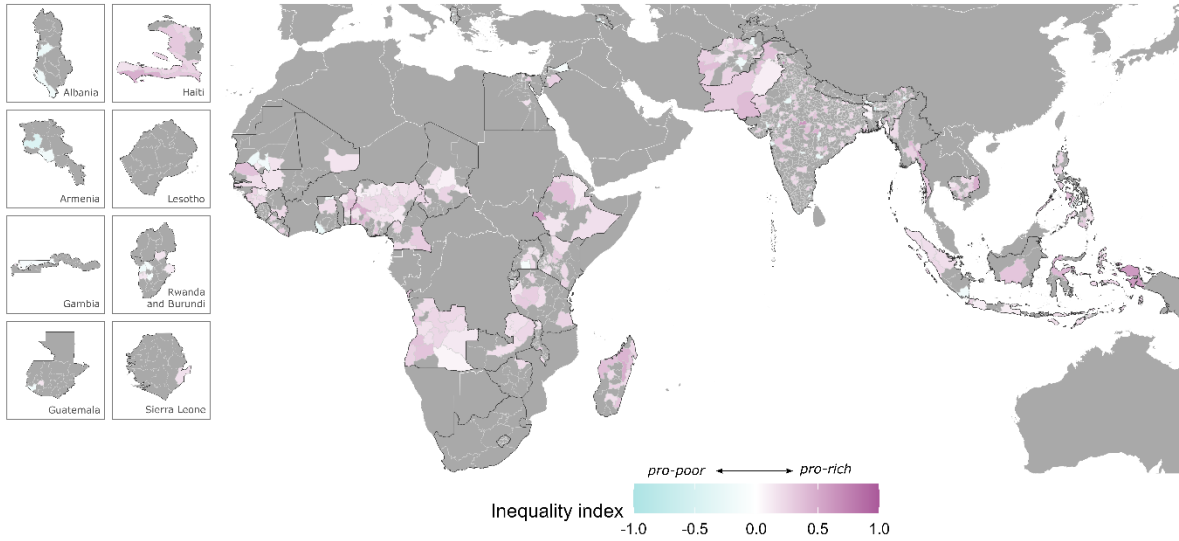

Supplement: pmed.1004166.s009.pdf [file pmed.1004166.s009.pdf]
