# Supplementary material for: Essential childhood immunization in 43 low- and middle-income countries: Analysis of spatial trends and socioeconomic inequalities in vaccine coverage
Source: PubMed Central journal article supplement (PMC9888726; doi:10.1371/journal.pmed.1004166), 2023-01-17

**Fig S4.** Bivariate map showing the intersection between full immunization coverage (FIC) and Wagstaff's (W) index of inequality. Spatial boundaries were retrieved from Natural Earth (<https://www.naturalearthdata.com/>) using "rnaturalearth" package (<https://github.com/ropenscilabs/rnaturalearth>).

Wagstaff's index of inequality (W) and full immunization coverage (FIC)

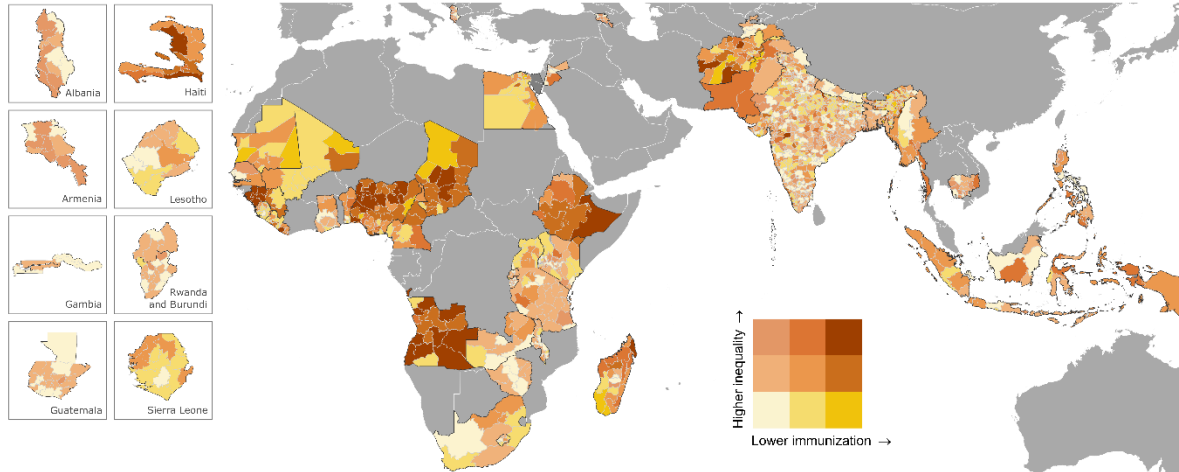

Supplement: pmed.1004166.s010.pdf [file pmed.1004166.s010.pdf]
